# Supplementary material for: Accelerating the exploration of novel perovskite-structured metal borohydrides with enhanced dehydrogenation performance through machine learning
Source: Royal Society of Chemistry journal article supplement (doi:10.1039/d4ta08236b), 2025-01-01
Supplement: d4ta08236b1.xlsx [file d4ta08236b1.xlsx]

## Sheet: ABX3
A-site	B_site	X_site	T_ML	tf	u	H%
Li	Ni	BH4	173.51	0.725588	0.347029	10.8465
Na	Ni	BH4	175.313	0.891915	0.347029	9.47245
K	Ni	BH4	173.133	0.957919	0.347029	8.40385
Rb	Ni	BH4	173.849	0.97904	0.347029	6.3438
Li	Mg	BH4	290.272	0.71755	0.362117	15.7385
Na	Mg	BH4	294.183	0.882036	0.362117	13.0018
K	Mg	BH4	293.138	0.947308	0.362117	11.0698
Rb	Mg	BH4	294.158	0.968195	0.362117	7.7533
Li	Ge	BH4	193.018	0.714911	0.367146	9.63461
Na	Ge	BH4	195.673	0.878791	0.367146	8.53486
K	Ge	BH4	193.245	0.943823	0.367146	7.65754
Rb	Ge	BH4	194.681	0.964633	0.367146	5.90907
Li	Co	BH4	158.944	0.710987	0.37469	10.8231
Na	Co	BH4	160.362	0.873968	0.37469	9.45455
K	Co	BH4	158.172	0.938643	0.37469	8.38976
Rb	Co	BH4	158.151	0.959339	0.37469	6.33576
Li	Fe	BH4	158.296	0.701998	0.392293	11.133
Na	Fe	BH4	153.115	0.862919	0.392293	9.69018
K	Fe	BH4	157.634	0.926776	0.392293	8.57478
Rb	Fe	BH4	150.838	0.94721	0.392293	6.44071
Li	V	BH4	197.837	0.699471	0.397323	11.6638
Na	V	BH4	200.388	0.859813	0.397323	10.0899
K	V	BH4	197.241	0.92344	0.397323	8.88627
Rb	V	BH4	198.243	0.943801	0.397323	6.61488
Li	Cr	BH4	186.922	0.696963	0.402352	11.5455
Na	Cr	BH4	188.63	0.856729	0.402352	10.0012
K	Cr	BH4	186.656	0.920128	0.402352	8.81742
Rb	Cr	BH4	187.083	0.940416	0.402352	6.57665
Li	Mn	BH4	208.431	0.689544	0.41744	11.2276
Na	Mn	BH4	217.208	0.847609	0.41744	9.76183
K	Mn	BH4	207.492	0.910334	0.41744	8.63084
Rb	Mn	BH4	214.589	0.930406	0.41744	6.47229
Li	Pd	BH4	174.125	0.682281	0.432528	7.57762
Li	Ti	BH4	219.083	0.682281	0.432528	12.0215
Na	Pd	BH4	173.941	0.838682	0.432528	6.88035
Na	Ti	BH4	223.342	0.838682	0.432528	10.3565
K	Pd	BH4	173.465	0.900746	0.432528	6.29861
K	Ti	BH4	224.085	0.900746	0.432528	9.0924
Rb	Pd	BH4	171.798	0.920606	0.432528	5.06569
Rb	Ti	BH4	225.532	0.920606	0.432528	6.72843
Li	Ag	BH4	174.873	0.663642	0.472764	7.50896
Na	Ag	BH4	177.158	0.81577	0.472764	6.8237
K	Ag	BH4	173.79	0.876138	0.472764	6.2511
Rb	Ag	BH4	174.971	0.895456	0.472764	5.03491
Li	Cd	BH4	227.045	0.661383	0.477793	7.30145
Na	Cd	BH4	226.643	0.812993	0.477793	6.65189
K	Cd	BH4	227.155	0.873156	0.477793	6.10661
Rb	Cd	BH4	224.876	0.892408	0.477793	4.94076
Li	Ca	BH4	340.316	0.650317	0.50294	13.0408
Na	Ca	BH4	344.945	0.79939	0.50294	11.1041
K	Ca	BH4	345.756	0.858546	0.50294	9.66368
Rb	Ca	BH4	346.901	0.877476	0.50294	7.03623
Li	Yb	BH4	347.022	0.645993	0.512999	5.33378
Na	Yb	BH4	352.09	0.794076	0.512999	4.97864
K	Yb	BH4	352.595	0.852839	0.512999	4.66675
Rb	Yb	BH4	354.401	0.871643	0.512999	3.95377
Li	Tm	BH4	266.023	0.643853	0.518028	5.43293
Na	Tm	BH4	269.885	0.791445	0.518028	5.06492
K	Tm	BH4	269.255	0.850013	0.518028	4.74247
Rb	Tm	BH4	270.877	0.868755	0.518028	4.00799
Li	Dy	BH4	271.465	0.635432	0.538146	5.59594
Na	Dy	BH4	275.683	0.781093	0.538146	5.2063
K	Dy	BH4	275.151	0.838896	0.538146	4.86621
Rb	Dy	BH4	276.671	0.857392	0.538146	4.09601
Li	Eu	BH4	340.76	0.615313	0.58844	5.88506
Na	Eu	BH4	345.65	0.756362	0.58844	5.45567
K	Eu	BH4	345.007	0.812334	0.58844	5.08338
Rb	Eu	BH4	346.155	0.830245	0.58844	4.2488
Li	Sr	BH4	352.227	0.613371	0.593469	8.59839
Na	Sr	BH4	357.263	0.753975	0.593469	7.7116
K	Sr	BH4	357.772	0.80977	0.593469	6.98819
Rb	Sr	BH4	359.593	0.827625	0.593469	5.50237
Li	Pb	BH4	226.872	0.611441	0.598499	4.63068
Na	Pb	BH4	230.968	0.751603	0.598499	4.36063
K	Pb	BH4	226.648	0.807222	0.598499	4.11949
Rb	Pb	BH4	229.63	0.825021	0.598499	3.55379

## Sheet: A2B1B2X6
A-site	B1-site	B2-site	X-site	TML	tf	u1	u2	H wt.%
Li	Na	Al	BH4	217.987	0.703	0.513	0.269	0.1692
Li	Na	Bi	BH4	194.932	0.645	0.513	0.518	0.0741
Li	Na	Ce	BH4	270.282	0.647	0.513	0.508	0.0941
Li	Na	Dy	BH4	275.215	0.658	0.513	0.459	0.0865
Li	Na	Er	BH4	276.046	0.66	0.513	0.448	0.0851
Li	Na	Eu	BH4	259.408	0.654	0.513	0.476	0.0899
Li	Na	Ga	BH4	193.984	0.692	0.513	0.312	0.13
Li	Na	Gd	BH4	274.233	0.655	0.513	0.472	0.0882
Li	Na	In	BH4	204.849	0.671	0.513	0.402	0.1045
Li	Na	La	BH4	271.366	0.645	0.513	0.519	0.0946
Li	Na	Lu	BH4	276.838	0.664	0.513	0.433	0.0828
Li	Na	Nd	BH4	272.012	0.65	0.513	0.494	0.0926
Li	Na	Pr	BH4	271.592	0.649	0.513	0.498	0.0938
Li	Na	Sb	BH4	192.604	0.675	0.513	0.382	0.1014
Li	Na	Sc	BH4	264.033	0.677	0.513	0.375	0.1502
Li	Na	Sm	BH4	273.273	0.653	0.513	0.482	0.0905
Li	Na	Tm	BH4	270.75	0.661	0.513	0.443	0.0846
Li	Na	Y	BH4	273.596	0.659	0.513	0.453	0.1178
Li	Na	Mo	BH4	185.613	0.684	0.513	0.347	0.1138
Li	Na	Cr	BH4	215.677	0.693	0.513	0.309	0.1438
Li	Na	Yb	BH4	247.78	0.663	0.513	0.437	0.0834
Li	Na	Rh	BH4	187.025	0.687	0.513	0.334	0.1102
Li	Na	Ru	BH4	184.679	0.685	0.513	0.342	0.1111
Li	K	Al	BH4	219.356	0.66	0.694	0.269	0.1519
Li	K	Bi	BH4	196.31	0.609	0.694	0.518	0.0706
Li	K	Ce	BH4	272.022	0.611	0.694	0.508	0.0885
Li	K	Dy	BH4	276.749	0.62	0.694	0.459	0.0818
Li	K	Er	BH4	277.582	0.622	0.694	0.448	0.0805
Li	K	Eu	BH4	260.92	0.617	0.694	0.476	0.0848
Li	K	Ga	BH4	196.006	0.65	0.694	0.312	0.1196
Li	K	Gd	BH4	275.719	0.618	0.694	0.472	0.0833
Li	K	In	BH4	206.257	0.631	0.694	0.402	0.0976
Li	K	La	BH4	272.903	0.608	0.694	0.519	0.0889
Li	K	Lu	BH4	278.422	0.625	0.694	0.433	0.0784
Li	K	Nd	BH4	273.492	0.613	0.694	0.494	0.0872
Li	K	Pr	BH4	273.185	0.612	0.694	0.498	0.0883
Li	K	Sb	BH4	194.12	0.636	0.694	0.382	0.095
Li	K	Sc	BH4	265.88	0.637	0.694	0.375	0.1364
Li	K	Sm	BH4	274.548	0.616	0.694	0.482	0.0853
Li	K	Tm	BH4	272.316	0.623	0.694	0.443	0.08
Li	K	Y	BH4	275.09	0.621	0.694	0.453	0.1091
Li	K	Mo	BH4	187.6	0.643	0.694	0.347	0.1058
Li	K	Cr	BH4	217.491	0.651	0.694	0.309	0.1312
Li	K	Yb	BH4	249.361	0.625	0.694	0.437	0.0789
Li	K	Rh	BH4	189.018	0.646	0.694	0.334	0.1026
Li	K	Ru	BH4	186.662	0.644	0.694	0.342	0.1034
Li	Rb	Al	BH4	217.335	0.644	0.764	0.269	0.1175
Li	Rb	Bi	BH4	195.594	0.596	0.764	0.518	0.0621
Li	Rb	Ce	BH4	270.508	0.597	0.764	0.508	0.0756
Li	Rb	Dy	BH4	275.444	0.607	0.764	0.459	0.0706
Li	Rb	Er	BH4	276.275	0.609	0.764	0.448	0.0696
Li	Rb	Eu	BH4	261.666	0.603	0.764	0.476	0.0729
Li	Rb	Ga	BH4	193.975	0.636	0.764	0.312	0.0971
Li	Rb	Gd	BH4	274.461	0.604	0.764	0.472	0.0717
Li	Rb	In	BH4	205.049	0.617	0.764	0.402	0.0821
Li	Rb	La	BH4	271.593	0.595	0.764	0.519	0.0759
Li	Rb	Lu	BH4	277.067	0.611	0.764	0.433	0.0681
Li	Rb	Nd	BH4	272.239	0.6	0.764	0.494	0.0746
Li	Rb	Pr	BH4	271.82	0.599	0.764	0.498	0.0754
Li	Rb	Sb	BH4	192.827	0.621	0.764	0.382	0.0802
Li	Rb	Sc	BH4	263.856	0.623	0.764	0.375	0.108
Li	Rb	Sm	BH4	273.363	0.602	0.764	0.482	0.0732
Li	Rb	Tm	BH4	270.977	0.61	0.764	0.443	0.0693
Li	Rb	Y	BH4	273.759	0.608	0.764	0.453	0.0901
Li	Rb	Mo	BH4	186.027	0.628	0.764	0.347	0.0878
Li	Rb	Cr	BH4	216.221	0.636	0.764	0.309	0.1046
Li	Rb	Yb	BH4	250.189	0.611	0.764	0.437	0.0685
Li	Rb	Rh	BH4	187.572	0.631	0.764	0.334	0.0856
Li	Rb	Ru	BH4	185.118	0.629	0.764	0.342	0.0862
Li	Ag	Al	BH4	178.712	0.687	0.578	0.269	0.1059
Li	Ag	Bi	BH4	162.713	0.631	0.578	0.518	0.0587
Li	Ag	Ce	BH4	229.013	0.633	0.578	0.508	0.0706
Li	Ag	Dy	BH4	232.656	0.644	0.578	0.459	0.0663
Li	Ag	Er	BH4	233.003	0.646	0.578	0.448	0.0654
Li	Ag	Eu	BH4	223.882	0.64	0.578	0.476	0.0682
Li	Ag	Ga	BH4	159.069	0.676	0.578	0.312	0.0891
Li	Ag	Gd	BH4	231.73	0.641	0.578	0.472	0.0672
Li	Ag	In	BH4	167.059	0.656	0.578	0.402	0.0763
Li	Ag	La	BH4	230.456	0.631	0.578	0.519	0.0709
Li	Ag	Lu	BH4	233.002	0.649	0.578	0.433	0.064
Li	Ag	Nd	BH4	230.664	0.636	0.578	0.494	0.0698
Li	Ag	Pr	BH4	230.276	0.636	0.578	0.498	0.0705
Li	Ag	Sb	BH4	160.273	0.66	0.578	0.382	0.0746
Li	Ag	Sc	BH4	223.258	0.662	0.578	0.375	0.0981
Li	Ag	Sm	BH4	230.858	0.639	0.578	0.482	0.0685
Li	Ag	Tm	BH4	227.496	0.647	0.578	0.443	0.0651
Li	Ag	Y	BH4	231.163	0.645	0.578	0.453	0.0831
Li	Ag	Mo	BH4	150.98	0.668	0.578	0.347	0.0812
Li	Ag	Cr	BH4	176.223	0.677	0.578	0.309	0.0953
Li	Ag	Yb	BH4	216.478	0.648	0.578	0.437	0.0644
Li	Ag	Rh	BH4	153.878	0.671	0.578	0.334	0.0793
Li	Ag	Ru	BH4	150.995	0.669	0.578	0.342	0.0798
Na	Li	Al	BH4	216.222	0.906	0.382	0.269	0.152
Na	Li	Bi	BH4	192.135	0.829	0.382	0.518	0.0706
Na	Li	Ce	BH4	267.236	0.832	0.382	0.508	0.0885
Na	Li	Dy	BH4	272.175	0.846	0.382	0.459	0.0818
Na	Li	Er	BH4	273.001	0.849	0.382	0.448	0.0805
Na	Li	Eu	BH4	256.608	0.841	0.382	0.476	0.0848
Na	Li	Ga	BH4	191.861	0.892	0.382	0.312	0.1196
Na	Li	Gd	BH4	271.206	0.842	0.382	0.472	0.0833
Na	Li	In	BH4	202.306	0.863	0.382	0.402	0.0977
Na	Li	La	BH4	268.296	0.828	0.382	0.519	0.0889
Na	Li	Lu	BH4	274.037	0.854	0.382	0.433	0.0785
Na	Li	Nd	BH4	268.974	0.835	0.382	0.494	0.0872
Na	Li	Pr	BH4	268.569	0.834	0.382	0.498	0.0883
Na	Li	Sb	BH4	190.258	0.869	0.382	0.382	0.095
Na	Li	Sc	BH4	261.957	0.872	0.382	0.375	0.1365
Na	Li	Sm	BH4	270.275	0.839	0.382	0.482	0.0853
Na	Li	Tm	BH4	267.817	0.851	0.382	0.443	0.08
Na	Li	Y	BH4	270.637	0.848	0.382	0.453	0.1092
Na	Li	Mo	BH4	183.51	0.881	0.382	0.347	0.1058
Na	Li	Cr	BH4	213.728	0.893	0.382	0.309	0.1312
Na	Li	Yb	BH4	245.054	0.853	0.382	0.437	0.079
Na	Li	Rh	BH4	185.072	0.885	0.382	0.334	0.1026
Na	Li	Ru	BH4	182.771	0.882	0.382	0.342	0.1035
Na	K	Al	BH4	217.184	0.811	0.694	0.269	0.1263
Na	K	Bi	BH4	193.87	0.748	0.694	0.518	0.0645
Na	K	Ce	BH4	269.446	0.751	0.694	0.508	0.0792
Na	K	Dy	BH4	274.127	0.762	0.694	0.459	0.0737
Na	K	Er	BH4	274.956	0.765	0.694	0.448	0.0727
Na	K	Eu	BH4	258.429	0.758	0.694	0.476	0.0762
Na	K	Ga	BH4	193.707	0.8	0.694	0.312	0.1031
Na	K	Gd	BH4	273.087	0.759	0.694	0.472	0.0749
Na	K	In	BH4	203.937	0.776	0.694	0.402	0.0864
Na	K	La	BH4	270.27	0.748	0.694	0.519	0.0795
Na	K	Lu	BH4	276.098	0.769	0.694	0.433	0.071
Na	K	Nd	BH4	270.871	0.754	0.694	0.494	0.0781
Na	K	Pr	BH4	270.578	0.753	0.694	0.498	0.079
Na	K	Sb	BH4	192.131	0.781	0.694	0.382	0.0843
Na	K	Sc	BH4	263.455	0.783	0.694	0.375	0.1154
Na	K	Sm	BH4	271.942	0.757	0.694	0.482	0.0766
Na	K	Tm	BH4	269.799	0.766	0.694	0.443	0.0723
Na	K	Y	BH4	272.487	0.764	0.694	0.453	0.0952
Na	K	Mo	BH4	185.769	0.79	0.694	0.347	0.0927
Na	K	Cr	BH4	215.5	0.8	0.694	0.309	0.1116
Na	K	Yb	BH4	246.937	0.768	0.694	0.437	0.0714
Na	K	Rh	BH4	187.182	0.794	0.694	0.334	0.0902
Na	K	Ru	BH4	184.835	0.792	0.694	0.342	0.0909
Na	Rb	Al	BH4	215.654	0.792	0.764	0.269	0.1015
Na	Rb	Bi	BH4	193.138	0.732	0.764	0.518	0.0574
Na	Rb	Ce	BH4	267.917	0.734	0.764	0.508	0.0687
Na	Rb	Dy	BH4	272.805	0.746	0.764	0.459	0.0645
Na	Rb	Er	BH4	273.632	0.748	0.764	0.448	0.0637
Na	Rb	Eu	BH4	259.102	0.742	0.764	0.476	0.0664
Na	Rb	Ga	BH4	192.144	0.781	0.764	0.312	0.086
Na	Rb	Gd	BH4	271.812	0.743	0.764	0.472	0.0654
Na	Rb	In	BH4	202.715	0.759	0.764	0.402	0.074
Na	Rb	La	BH4	268.922	0.732	0.764	0.519	0.0689
Na	Rb	Lu	BH4	274.726	0.752	0.764	0.433	0.0624
Na	Rb	Nd	BH4	269.601	0.737	0.764	0.494	0.0679
Na	Rb	Pr	BH4	269.196	0.737	0.764	0.498	0.0685
Na	Rb	Sb	BH4	190.823	0.764	0.764	0.382	0.0725
Na	Rb	Sc	BH4	261.968	0.766	0.764	0.375	0.0943
Na	Rb	Sm	BH4	270.739	0.74	0.764	0.482	0.0667
Na	Rb	Tm	BH4	268.443	0.749	0.764	0.443	0.0634
Na	Rb	Y	BH4	271.139	0.747	0.764	0.453	0.0804
Na	Rb	Mo	BH4	184.654	0.772	0.764	0.347	0.0786
Na	Rb	Cr	BH4	214.716	0.782	0.764	0.309	0.0918
Na	Rb	Yb	BH4	247.693	0.751	0.764	0.437	0.0627
Na	Rb	Rh	BH4	186.194	0.776	0.764	0.334	0.0768
Na	Rb	Ru	BH4	183.747	0.774	0.764	0.342	0.0773
Na	Ag	Al	BH4	176.912	0.844	0.578	0.269	0.0927
Na	Ag	Bi	BH4	160.187	0.776	0.578	0.518	0.0544
Na	Ag	Ce	BH4	226.34	0.779	0.578	0.508	0.0645
Na	Ag	Dy	BH4	229.942	0.791	0.578	0.459	0.0609
Na	Ag	Er	BH4	230.287	0.794	0.578	0.448	0.0601
Na	Ag	Eu	BH4	221.223	0.787	0.578	0.476	0.0625
Na	Ag	Ga	BH4	157.134	0.832	0.578	0.312	0.0796
Na	Ag	Gd	BH4	229.007	0.788	0.578	0.472	0.0617
Na	Ag	In	BH4	164.666	0.806	0.578	0.402	0.0692
Na	Ag	La	BH4	227.707	0.776	0.578	0.519	0.0647
Na	Ag	Lu	BH4	230.566	0.798	0.578	0.433	0.059
Na	Ag	Nd	BH4	227.947	0.782	0.578	0.494	0.0638
Na	Ag	Pr	BH4	227.572	0.781	0.578	0.498	0.0644
Na	Ag	Sb	BH4	158.216	0.812	0.578	0.382	0.0679
Na	Ag	Sc	BH4	221.236	0.814	0.578	0.375	0.0867
Na	Ag	Sm	BH4	228.158	0.785	0.578	0.482	0.0628
Na	Ag	Tm	BH4	224.886	0.796	0.578	0.443	0.0599
Na	Ag	Y	BH4	228.467	0.793	0.578	0.453	0.0748
Na	Ag	Mo	BH4	149.523	0.822	0.578	0.347	0.0732
Na	Ag	Cr	BH4	174.549	0.832	0.578	0.309	0.0846
Na	Ag	Yb	BH4	213.871	0.797	0.578	0.437	0.0593
Na	Ag	Rh	BH4	152.41	0.825	0.578	0.334	0.0717
Na	Ag	Ru	BH4	149.537	0.823	0.578	0.342	0.0721
K	Li	Al	BH4	238.27	0.974	0.382	0.269	0.1262
K	Li	Bi	BH4	218.47	0.89	0.382	0.518	0.0645
K	Li	Ce	BH4	291.07	0.893	0.382	0.508	0.0791
K	Li	Dy	BH4	296.004	0.909	0.382	0.459	0.0737
K	Li	Er	BH4	296.83	0.912	0.382	0.448	0.0726
K	Li	Eu	BH4	279.557	0.903	0.382	0.476	0.0762
K	Li	Ga	BH4	215.851	0.958	0.382	0.312	0.1031
K	Li	Gd	BH4	295.373	0.904	0.382	0.472	0.0749
K	Li	In	BH4	226.211	0.927	0.382	0.402	0.0863
K	Li	La	BH4	293.171	0.89	0.382	0.519	0.0795
K	Li	Lu	BH4	295.611	0.917	0.382	0.433	0.071
K	Li	Nd	BH4	293.018	0.897	0.382	0.494	0.0781
K	Li	Pr	BH4	292.569	0.896	0.382	0.498	0.0789
K	Li	Sb	BH4	212.581	0.934	0.382	0.382	0.0842
K	Li	Sc	BH4	284.113	0.936	0.382	0.375	0.1153
K	Li	Sm	BH4	294.188	0.901	0.382	0.482	0.0766
K	Li	Tm	BH4	290.641	0.914	0.382	0.443	0.0723
K	Li	Y	BH4	294.582	0.91	0.382	0.453	0.0952
K	Li	Mo	BH4	202.134	0.946	0.382	0.347	0.0926
K	Li	Cr	BH4	234.067	0.959	0.382	0.309	0.1116
K	Li	Yb	BH4	267.511	0.916	0.382	0.437	0.0714
K	Li	Rh	BH4	203.918	0.95	0.382	0.334	0.0902
K	Li	Ru	BH4	201.433	0.947	0.382	0.342	0.0908
K	Na	Al	BH4	238.341	0.928	0.513	0.269	0.1164
K	Na	Bi	BH4	218.82	0.852	0.513	0.518	0.0618
K	Na	Ce	BH4	291.529	0.854	0.513	0.508	0.0752
K	Na	Dy	BH4	296.409	0.869	0.513	0.459	0.0702
K	Na	Er	BH4	297.235	0.872	0.513	0.448	0.0693
K	Na	Eu	BH4	279.849	0.863	0.513	0.476	0.0725
K	Na	Ga	BH4	216.144	0.914	0.513	0.312	0.0964
K	Na	Gd	BH4	295.753	0.865	0.513	0.472	0.0713
K	Na	In	BH4	226.419	0.885	0.513	0.402	0.0816
K	Na	La	BH4	293.53	0.851	0.513	0.519	0.0754
K	Na	Lu	BH4	296.075	0.876	0.513	0.433	0.0678
K	Na	Nd	BH4	293.42	0.858	0.513	0.494	0.0742
K	Na	Pr	BH4	292.972	0.857	0.513	0.498	0.075
K	Na	Sb	BH4	212.927	0.891	0.513	0.382	0.0797
K	Na	Sc	BH4	284.293	0.894	0.513	0.375	0.1071
K	Na	Sm	BH4	294.564	0.862	0.513	0.482	0.0728
K	Na	Tm	BH4	291.042	0.873	0.513	0.443	0.0689
K	Na	Y	BH4	294.922	0.87	0.513	0.453	0.0895
K	Na	Mo	BH4	202.882	0.902	0.513	0.347	0.0872
K	Na	Cr	BH4	234.518	0.915	0.513	0.309	0.1038
K	Na	Yb	BH4	267.796	0.875	0.513	0.437	0.0681
K	Na	Rh	BH4	204.506	0.906	0.513	0.334	0.0851
K	Na	Ru	BH4	201.981	0.904	0.513	0.342	0.0856
K	Rb	Al	BH4	237.19	0.851	0.764	0.269	0.0893
K	Rb	Bi	BH4	218.843	0.786	0.764	0.518	0.0533
K	Rb	Ce	BH4	290.994	0.789	0.764	0.508	0.0629
K	Rb	Dy	BH4	295.869	0.801	0.764	0.459	0.0594
K	Rb	Er	BH4	296.755	0.804	0.764	0.448	0.0587
K	Rb	Eu	BH4	281.809	0.796	0.764	0.476	0.061
K	Rb	Ga	BH4	215.681	0.839	0.764	0.312	0.0771
K	Rb	Gd	BH4	295.214	0.798	0.764	0.472	0.0602
K	Rb	In	BH4	226.164	0.815	0.764	0.402	0.0673
K	Rb	La	BH4	293.018	0.786	0.764	0.519	0.0631
K	Rb	Lu	BH4	295.595	0.807	0.764	0.433	0.0576
K	Rb	Nd	BH4	292.883	0.792	0.764	0.494	0.0622
K	Rb	Pr	BH4	292.435	0.791	0.764	0.498	0.0627
K	Rb	Sb	BH4	212.649	0.82	0.764	0.382	0.066
K	Rb	Sc	BH4	283.348	0.822	0.764	0.375	0.0837
K	Rb	Sm	BH4	293.942	0.795	0.764	0.482	0.0612
K	Rb	Tm	BH4	290.566	0.805	0.764	0.443	0.0585
K	Rb	Y	BH4	294.375	0.802	0.764	0.453	0.0726
K	Rb	Mo	BH4	202.933	0.83	0.764	0.347	0.0711
K	Rb	Cr	BH4	234.68	0.84	0.764	0.309	0.0817
K	Rb	Yb	BH4	270.159	0.806	0.764	0.437	0.0579
K	Rb	Rh	BH4	204.694	0.833	0.764	0.334	0.0697
K	Rb	Ru	BH4	202.059	0.831	0.764	0.342	0.07
K	Ag	Al	BH4	200.499	0.906	0.578	0.269	0.0825
K	Ag	Bi	BH4	187.733	0.834	0.578	0.518	0.0507
K	Ag	Ce	BH4	251.809	0.836	0.578	0.508	0.0594
K	Ag	Dy	BH4	255.389	0.85	0.578	0.459	0.0563
K	Ag	Er	BH4	255.773	0.853	0.578	0.448	0.0556
K	Ag	Eu	BH4	246.436	0.845	0.578	0.476	0.0577
K	Ag	Ga	BH4	182.516	0.893	0.578	0.312	0.0719
K	Ag	Gd	BH4	254.759	0.846	0.578	0.472	0.057
K	Ag	In	BH4	189.914	0.866	0.578	0.402	0.0633
K	Ag	La	BH4	254.131	0.833	0.578	0.519	0.0596
K	Ag	Lu	BH4	253.935	0.857	0.578	0.433	0.0547
K	Ag	Nd	BH4	253.621	0.84	0.578	0.494	0.0588
K	Ag	Pr	BH4	253.204	0.839	0.578	0.498	0.0593
K	Ag	Sb	BH4	181.935	0.872	0.578	0.382	0.0622
K	Ag	Sc	BH4	245.101	0.874	0.578	0.375	0.0777
K	Ag	Sm	BH4	253.725	0.843	0.578	0.482	0.0579
K	Ag	Tm	BH4	249.376	0.854	0.578	0.443	0.0554
K	Ag	Y	BH4	254.064	0.852	0.578	0.453	0.068
K	Ag	Mo	BH4	169.735	0.882	0.578	0.347	0.0667
K	Ag	Cr	BH4	196.596	0.894	0.578	0.309	0.0759
K	Ag	Yb	BH4	238.942	0.856	0.578	0.437	0.0549
K	Ag	Rh	BH4	172.909	0.886	0.578	0.334	0.0654
K	Ag	Ru	BH4	169.814	0.884	0.578	0.342	0.0657
Rb	Li	Al	BH4	245.581	0.995	0.382	0.269	0.0848
Rb	Li	Bi	BH4	225.298	0.91	0.382	0.518	0.0516
Rb	Li	Ce	BH4	299.472	0.913	0.382	0.508	0.0606
Rb	Li	Dy	BH4	305.19	0.929	0.382	0.459	0.0574
Rb	Li	Er	BH4	306.029	0.932	0.382	0.448	0.0567
Rb	Li	Eu	BH4	285.554	0.923	0.382	0.476	0.0588
Rb	Li	Ga	BH4	222.626	0.979	0.382	0.312	0.0737
Rb	Li	Gd	BH4	304.884	0.924	0.382	0.472	0.0581
Rb	Li	In	BH4	232.947	0.947	0.382	0.402	0.0647
Rb	Li	La	BH4	303.161	0.909	0.382	0.519	0.0608
Rb	Li	Lu	BH4	304.535	0.937	0.382	0.433	0.0557
Rb	Li	Nd	BH4	300.893	0.917	0.382	0.494	0.06
Rb	Li	Pr	BH4	300.054	0.916	0.382	0.498	0.0605
Rb	Li	Sb	BH4	218.553	0.954	0.382	0.382	0.0636
Rb	Li	Sc	BH4	292.235	0.957	0.382	0.375	0.0798
Rb	Li	Sm	BH4	302.238	0.921	0.382	0.482	0.0591
Rb	Li	Tm	BH4	298.162	0.934	0.382	0.443	0.0565
Rb	Li	Y	BH4	302.479	0.931	0.382	0.453	0.0696
Rb	Li	Mo	BH4	206.794	0.967	0.382	0.347	0.0682
Rb	Li	Cr	BH4	240.138	0.98	0.382	0.309	0.078
Rb	Li	Yb	BH4	267.422	0.936	0.382	0.437	0.056
Rb	Li	Rh	BH4	203.197	0.971	0.382	0.334	0.0669
Rb	Li	Ru	BH4	195.508	0.968	0.382	0.342	0.0672
Rb	Na	Al	BH4	245.549	0.948	0.513	0.269	0.0803
Rb	Na	Bi	BH4	225.553	0.87	0.513	0.518	0.0499
Rb	Na	Ce	BH4	299.825	0.873	0.513	0.508	0.0582
Rb	Na	Dy	BH4	305.486	0.888	0.513	0.459	0.0552
Rb	Na	Er	BH4	306.326	0.891	0.513	0.448	0.0546
Rb	Na	Eu	BH4	285.737	0.882	0.513	0.476	0.0566
Rb	Na	Ga	BH4	222.824	0.934	0.513	0.312	0.0702
Rb	Na	Gd	BH4	305.155	0.884	0.513	0.472	0.0559
Rb	Na	In	BH4	233.056	0.905	0.513	0.402	0.0621
Rb	Na	La	BH4	303.41	0.87	0.513	0.519	0.0584
Rb	Na	Lu	BH4	304.89	0.895	0.513	0.433	0.0537
Rb	Na	Nd	BH4	301.187	0.877	0.513	0.494	0.0577
Rb	Na	Pr	BH4	300.347	0.876	0.513	0.498	0.0581
Rb	Na	Sb	BH4	218.804	0.911	0.513	0.382	0.061
Rb	Na	Sc	BH4	292.305	0.914	0.513	0.375	0.0757
Rb	Na	Sm	BH4	302.504	0.881	0.513	0.482	0.0568
Rb	Na	Tm	BH4	298.454	0.893	0.513	0.443	0.0544
Rb	Na	Y	BH4	302.71	0.89	0.513	0.453	0.0665
Rb	Na	Mo	BH4	207.172	0.922	0.513	0.347	0.0652
Rb	Na	Cr	BH4	240.406	0.935	0.513	0.309	0.0741
Rb	Na	Yb	BH4	267.6	0.894	0.513	0.437	0.0539
Rb	Na	Rh	BH4	203.572	0.926	0.513	0.334	0.064
Rb	Na	Ru	BH4	195.744	0.924	0.513	0.342	0.0643
Rb	K	Al	BH4	245.836	0.89	0.694	0.269	0.0762
Rb	K	Bi	BH4	226.24	0.821	0.694	0.518	0.0483
Rb	K	Ce	BH4	300.761	0.824	0.694	0.508	0.0561
Rb	K	Dy	BH4	306.198	0.837	0.694	0.459	0.0533
Rb	K	Er	BH4	307.038	0.84	0.694	0.448	0.0527
Rb	K	Eu	BH4	286.447	0.832	0.694	0.476	0.0545
Rb	K	Ga	BH4	223.862	0.878	0.694	0.312	0.0671
Rb	K	Gd	BH4	305.819	0.833	0.694	0.472	0.0539
Rb	K	In	BH4	233.752	0.852	0.694	0.402	0.0596
Rb	K	La	BH4	303.907	0.821	0.694	0.519	0.0562
Rb	K	Lu	BH4	305.648	0.844	0.694	0.433	0.0518
Rb	K	Nd	BH4	301.846	0.827	0.694	0.494	0.0555
Rb	K	Pr	BH4	301.125	0.826	0.694	0.498	0.056
Rb	K	Sb	BH4	219.719	0.858	0.694	0.382	0.0586
Rb	K	Sc	BH4	292.985	0.86	0.694	0.375	0.0721
Rb	K	Sm	BH4	302.945	0.831	0.694	0.482	0.0547
Rb	K	Tm	BH4	299.204	0.841	0.694	0.443	0.0525
Rb	K	Y	BH4	303.38	0.838	0.694	0.453	0.0637
Rb	K	Mo	BH4	208.177	0.867	0.694	0.347	0.0625
Rb	K	Cr	BH4	241.163	0.878	0.694	0.309	0.0706
Rb	K	Yb	BH4	268.392	0.843	0.694	0.437	0.0521
Rb	K	Rh	BH4	204.57	0.871	0.694	0.334	0.0614
Rb	K	Ru	BH4	196.725	0.869	0.694	0.342	0.0617
Rb	Ag	Al	BH4	207.161	0.926	0.578	0.269	0.0625
Rb	Ag	Bi	BH4	193.84	0.852	0.578	0.518	0.0424
Rb	Ag	Ce	BH4	258.98	0.855	0.578	0.508	0.0483
Rb	Ag	Dy	BH4	263.267	0.869	0.578	0.459	0.0462
Rb	Ag	Er	BH4	263.657	0.872	0.578	0.448	0.0458
Rb	Ag	Eu	BH4	251.742	0.864	0.578	0.476	0.0472
Rb	Ag	Ga	BH4	188.726	0.913	0.578	0.312	0.0563
Rb	Ag	Gd	BH4	262.939	0.865	0.578	0.472	0.0467
Rb	Ag	In	BH4	196.055	0.885	0.578	0.402	0.0509
Rb	Ag	La	BH4	262.779	0.852	0.578	0.519	0.0484
Rb	Ag	Lu	BH4	261.555	0.876	0.578	0.433	0.0451
Rb	Ag	Nd	BH4	260.3	0.859	0.578	0.494	0.0479
Rb	Ag	Pr	BH4	259.52	0.858	0.578	0.498	0.0482
Rb	Ag	Sb	BH4	187.28	0.891	0.578	0.382	0.0502
Rb	Ag	Sc	BH4	252.016	0.893	0.578	0.375	0.0597
Rb	Ag	Sm	BH4	260.551	0.862	0.578	0.482	0.0473
Rb	Ag	Tm	BH4	256.013	0.873	0.578	0.443	0.0457
Rb	Ag	Y	BH4	260.749	0.87	0.578	0.453	0.0538
Rb	Ag	Mo	BH4	174.289	0.902	0.578	0.347	0.053
Rb	Ag	Cr	BH4	201.912	0.914	0.578	0.309	0.0587
Rb	Ag	Yb	BH4	238.743	0.875	0.578	0.437	0.0453
Rb	Ag	Rh	BH4	172.329	0.906	0.578	0.334	0.0522
Rb	Ag	Ru	BH4	164.488	0.903	0.578	0.342	0.0524
