# Supplementary material for: Accelerating the exploration of novel perovskite-structured metal borohydrides with enhanced dehydrogenation performance through machine learning
Source: Royal Society of Chemistry journal article supplement (doi:10.1039/d4ta08236b), 2025-01-01
Supplement: d4ta08236b2.pdf [file d4ta08236b2.pdf]

## Electronic Supporting Information

### **Accelerating the Exploration of Novel Perovskite-Structured Metal Borohydrides with Enhanced Dehydrogenation Performance Through Machine Learning**

Jingjing Zhang, ‡<sup>[a]</sup> Jinwei Fan, ‡<sup>[a]</sup> Xiaowei Chen,<sup>[c]</sup> Jiyue Zhang,<sup>[a]</sup> Jing Peng,<sup>[b]</sup> Xiaojun Yan,<sup>[a][d][e][f]</sup>  
and Jianmei Huang <sup>\*[a][d][e]</sup>

<sup>a</sup>School of Energy and Power Engineering, Beihang University, Beijing 100191, China

E-mail: jmhuang@buaa.edu.cn.

<sup>b</sup>School of Materials Science and Engineering, Beihang University, Beijing 100191, China

<sup>c</sup>School of Science, Jimei University, Xiamen 361021, China

<sup>d</sup>National Key Laboratory of Science and Technology on Aero-Engine Aero-thermodynamics,

<sup>e</sup>Beijing Key Laboratory of Aero-Engine Structure and Strength, Beihang University, Beijing  
100191, China

<sup>f</sup>Collaborative Innovation Center of Advanced Aero-Engine, Beihang University, Beijing  
100191, China

‡ These authors contributed equally to this work and should be considered co-first authors.

Table S1 Coordination number and oxidation state of metal ions in perovskite structured metal borohydrides.

| Structure Type      | perovskite structure |        | Double perovskite structure |                      |                      |
|---------------------|----------------------|--------|-----------------------------|----------------------|----------------------|
|                     | A-site               | B-site | A-site                      | B <sub>1</sub> -site | B <sub>2</sub> -site |
| Metal Position      | A-site               | B-site | A-site                      | B <sub>1</sub> -site | B <sub>2</sub> -site |
| Coordination Number | 12                   | 6      | 12                          | 6                    | 6                    |
| Oxidation State     | +1                   | +2     | +1                          | +1                   | +3                   |

Table S2 Physical and chemical properties of elements

| Number | Property Name                    | Explanation               | Abbreviation |
|--------|----------------------------------|---------------------------|--------------|
| 1      | Density                          | -                         | D            |
| 2      | at. wt                           | Relative Atomic Mass      | Wt           |
| 3      | BCC-energy                       | Energy in BCC Database    | BCC-e        |
| 4      | BCC-fermi                        | Fermi Energy              | BCC-fermi    |
| 5      | BCC-volume                       | Volume in BCC Database    | BCC-v        |
| 6      | GS-energy                        | Energy in GS Database     | GS-e         |
| 7      | ICSD-Volume                      | Volume in ICSD Database   | ICSD-V       |
| 8      | Covalent radius                  | -                         | Cov-R        |
| 9      | Ionization Energy                | -                         | IE           |
| 10     | Atomic Radius                    | -                         | AtoR         |
| 11     | Electron Affinity                | -                         | EA           |
| 12     | At. Radius                       | Ionic Radius              | At. R        |
| 13     | Atomic Volume                    | -                         | AtoV         |
| 14     | 1st Ionization Potential         | -                         | 1stIP        |
| 15     | 2nd Ionization Potential         | -                         | 2ndIP        |
| 16     | 3rd Ionization Potential         | -                         | 3rdIP        |
| 17     | Coefficient of Thermal Expansion | -                         | COTE         |
| 18     | Specific heat capacity           | -                         | SHC          |
| 19     | Thermal conductivity             | -                         | TC           |
| 20     | Heat of fusion                   | -                         | HoF          |
| 21     | Heat of Vaporization             | -                         | HoV          |
| 22     | At.                              | Atomic Number             | At.          |
| 23     | Melting                          | Melting Point             | Melting      |
| 24     | Boiling                          | Boiling Point             | Boiling      |
| 25     | Electronegativity                | Pauling Electronegativity | Ele          |



Fig. S1 Relationship between the hydrogen desorption temperature and the electronegativity of the B-site metal cations in single perovskite metal borohydrides.



Fig. S2 Relationship between the hydrogen desorption temperature and the electronegativity of the B2-site metal cations in double perovskite metal borohydrides.
