# Supplementary material for: Accelerating the exploration of novel perovskite-structured metal borohydrides with enhanced dehydrogenation performance through machine learning
Source: Royal Society of Chemistry journal article supplement (doi:10.1039/d4ta08236b), 2025-01-01
Supplement: d4ta08236b3.xlsx [file d4ta08236b3.xlsx]

## Sheet: ABX3
A	B	X	e_above_hull	volume	energy	A_radius	B_radius	X_radius	density	band_gap	tf	u	melting_A	boiling_A	electronegativity_A	ionization_A	melting_B	boiling_B	electronegativity_B	ionization_B	melting_X	boiling_X	electronegativity_X	ionization_X	Density_A	at. wt._A	BCCenergy_pa_A	BCCfermi_A	BCCvolume_pa_A	GSenergy_pa_A	ICSDVolume_A	covalent radius_A	Ionization Energy_A	Atomic Radius_A	Electron Affinity_A	At. Radius (angstroms)_A	Atomic Volume_A	First Ionization Potential_A	Second Ionization Potential_A	Third Ionization Potential_A	Coeficient of Thermal Expansion_A	specific heat capacity_A	thermal conductivity_A	heat of fusion_A	Heat of Vaporization_A	At. #_A	Density_B	at. wt._B	BCCenergy_pa_B
Cs	Ba	I	0	1068.62	-63.4968	1.81	1.49	2.06	4.04603	3.6292	0.770846	0.723301	301.59	944	0.79	375.7	1000	2143	0.89	502.85	386.85	457.4	2.66	1008.39	1.87	132.905	-0.852602	0.477812	118.03	-0.854626	67.5	2.35	375.7	2.67	45.49	3.34	71.07	3.894	25.1		100	0.24	35.9	2.092	67.74	55	3.59	137.33	-1.92352
Rb	Sm	I	0.0564154	429.656	-33.4448	1.66	1.36	2.06	4.76563	0	0.769134	0.660194	312.46	961	0.82	403.03	1345	2076	1.17	544.54	386.85	457.4	2.66	1008.39	1.532	85.4678	-0.961937	0.0908836	88.64	-0.963335	93	2.16	403	2.48	46.89	2.98	55.9	4.177	27.28	40	91	0.363	58.2	2.34	69.2	37	2.75	150.36	-4.57324
Cs	Sm	I	0.0590544	457.432	-33.4065	1.81	1.36	2.06	4.82066	0	0.800147	0.660194	301.59	944	0.79	375.7	1345	2076	1.17	544.54	386.85	457.4	2.66	1008.39	1.87	132.905	-0.852602	0.477812	118.03	-0.854626	67.5	2.35	375.7	2.67	45.49	3.34	71.07	3.894	25.1		100	0.24	35.9	2.092	67.74	55	2.75	150.36	-4.57324
Cs	Sm	Cl	0.107934	166.356	-20.7626	1.81	1.36	1.67	3.88916	0	0.812123	0.814371	301.59	944	0.79	375.7	1345	2076	1.17	544.54	171.6	239.11	3.16	1251.19	1.87	132.905	-0.852602	0.477812	118.03	-0.854626	67.5	2.35	375.7	2.67	45.49	3.34	71.07	3.894	25.1		100	0.24	35.9	2.092	67.74	55	2.75	150.36	-4.57324
Cs	Sm	Br	0.0856813	780.599	-74.8856	1.81	1.36	1.82	4.45004	0	0.807169	0.747253	301.59	944	0.79	375.7	1345	2076	1.17	544.54	265.8	332	2.96	1139.86	1.87	132.905	-0.852602	0.477812	118.03	-0.854626	67.5	2.35	375.7	2.67	45.49	3.34	71.07	3.894	25.1		100	0.24	35.9	2.092	67.74	55	2.75	150.36	-4.57324
Cu	Pb	Br	0.459101	364.992	-27.4139	0.91	1.33	1.82	4.64468	0.2824	0.612826	0.730769	1357.77	3200	1.9	745.48	600.61	2022	2.33	715.6	265.8	332	2.96	1139.86	8.96	63.456	-3.64289	4.37874	11.08	-3.68065	11.8	1.17	745.4	1.278	118.3	1.57	7.1	7.726	20.292	36.83	16.5	0.385	401	13.14	300.5	29	11.35	207.2	-3.58277
K	Pb	I	0.0138004	882.245	-57.2529	1.52	1.33	2.06	4.72058	2.4304	0.746738	0.645631	336.53	1032	0.82	418.81	600.61	2022	2.33	715.6	386.85	457.4	2.66	1008.39	0.86	39.0983	-1.09652	-0.0540791	72.1	-1.09754	75.6	2.03	418.8	2.35	48.36	2.77	45.46	4.341	31.625	45.72	82	0.757	102.5	2.33	76.9	19	11.35	207.2	-3.58277
Rb	Pb	Br	0	385.932	-32.1281	1.66	1.33	1.82	4.58131	2.823	0.781185	0.730769	312.46	961	0.82	403.03	600.61	2022	2.33	715.6	265.8	332	2.96	1139.86	1.532	85.4678	-0.961937	0.0908836	88.64	-0.963335	93	2.16	403	2.48	46.89	2.98	55.9	4.177	27.28	40	91	0.363	58.2	2.34	69.2	37	11.35	207.2	-3.58277
Rb	Pb	Cl	0.0381256	186.765	-17.5399	1.66	1.33	1.67	3.54778	3.0393	0.784889	0.796407	312.46	961	0.82	403.03	600.61	2022	2.33	715.6	171.6	239.11	3.16	1251.19	1.532	85.4678	-0.961937	0.0908836	88.64	-0.963335	93	2.16	403	2.48	46.89	2.98	55.9	4.177	27.28	40	91	0.363	58.2	2.34	69.2	37	11.35	207.2	-3.58277
Rb	Pb	Cl	0.0383458	187.451	-17.5388	1.66	1.33	1.67	3.53478	3.091	0.784889	0.796407	312.46	961	0.82	403.03	600.61	2022	2.33	715.6	171.6	239.11	3.16	1251.19	1.532	85.4678	-0.961937	0.0908836	88.64	-0.963335	93	2.16	403	2.48	46.89	2.98	55.9	4.177	27.28	40	91	0.363	58.2	2.34	69.2	37	11.35	207.2	-3.58277
Rb	Pb	Br	0.0498612	214.226	-15.8148	1.66	1.33	1.82	4.12666	3.093	0.781185	0.730769	312.46	961	0.82	403.03	600.61	2022	2.33	715.6	265.8	332	2.96	1139.86	1.532	85.4678	-0.961937	0.0908836	88.64	-0.963335	93	2.16	403	2.48	46.89	2.98	55.9	4.177	27.28	40	91	0.363	58.2	2.34	69.2	37	11.35	207.2	-3.58277
Rb	Pb	Cl	0	336.881	-35.4611	1.66	1.33	1.67	3.93373	3.2997	0.784889	0.796407	312.46	961	0.82	403.03	600.61	2022	2.33	715.6	171.6	239.11	3.16	1251.19	1.532	85.4678	-0.961937	0.0908836	88.64	-0.963335	93	2.16	403	2.48	46.89	2.98	55.9	4.177	27.28	40	91	0.363	58.2	2.34	69.2	37	11.35	207.2	-3.58277
Rb	Pb	I	0	919.077	-57.2316	1.66	1.33	2.06	4.86652	2.4576	0.77594	0.645631	312.46	961	0.82	403.03	600.61	2022	2.33	715.6	386.85	457.4	2.66	1008.39	1.532	85.4678	-0.961937	0.0908836	88.64	-0.963335	93	2.16	403	2.48	46.89	2.98	55.9	4.177	27.28	40	91	0.363	58.2	2.34	69.2	37	11.35	207.2	-3.58277
Cs	Pb	Cl	0.0107922	188.335	-17.6994	1.81	1.33	1.67	3.93645	2.8506	0.820244	0.796407	301.59	944	0.79	375.7	600.61	2022	2.33	715.6	171.6	239.11	3.16	1251.19	1.87	132.905	-0.852602	0.477812	118.03	-0.854626	67.5	2.35	375.7	2.67	45.49	3.34	71.07	3.894	25.1		100	0.24	35.9	2.092	67.74	55	11.35	207.2	-3.58277
Cs	Pb	Br	0.0076016	429.044	-32.126	1.81	1.33	1.82	4.48816	1.9528	0.814856	0.730769	301.59	944	0.79	375.7	600.61	2022	2.33	715.6	265.8	332	2.96	1139.86	1.87	132.905	-0.852602	0.477812	118.03	-0.854626	67.5	2.35	375.7	2.67	45.49	3.34	71.07	3.894	25.1		100	0.24	35.9	2.092	67.74	55	11.35	207.2	-3.58277
Cs	Pb	Cl	0.00732867	188.519	-17.7168	1.81	1.33	1.67	3.9326	2.3955	0.820244	0.796407	301.59	944	0.79	375.7	600.61	2022	2.33	715.6	171.6	239.11	3.16	1251.19	1.87	132.905	-0.852602	0.477812	118.03	-0.854626	67.5	2.35	375.7	2.67	45.49	3.34	71.07	3.894	25.1		100	0.24	35.9	2.092	67.74	55	11.35	207.2	-3.58277
Cs	Pb	I	0	960.712	-57.487	1.81	1.33	2.06	4.98358	2.5222	0.807228	0.645631	301.59	944	0.79	375.7	600.61	2022	2.33	715.6	386.85	457.4	2.66	1008.39	1.87	132.905	-0.852602	0.477812	118.03	-0.854626	67.5	2.35	375.7	2.67	45.49	3.34	71.07	3.894	25.1		100	0.24	35.9	2.092	67.74	55	11.35	207.2	-3.58277
Cs	Pb	Br	0.0187682	217.877	-16.0072	1.81	1.33	1.82	4.41904	3.1527	0.814856	0.730769	301.59	944	0.79	375.7	600.61	2022	2.33	715.6	265.8	332	2.96	1139.86	1.87	132.905	-0.852602	0.477812	118.03	-0.854626	67.5	2.35	375.7	2.67	45.49	3.34	71.07	3.894	25.1		100	0.24	35.9	2.092	67.74	55	11.35	207.2	-3.58277
Cs	Pb	Br	0	805.451	-64.4041	1.81	1.33	1.82	4.78147	2.8917	0.814856	0.730769	301.59	944	0.79	375.7	600.61	2022	2.33	715.6	265.8	332	2.96	1139.86	1.87	132.905	-0.852602	0.477812	118.03	-0.854626	67.5	2.35	375.7	2.67	45.49	3.34	71.07	3.894	25.1		100	0.24	35.9	2.092	67.74	55	11.35	207.2	-3.58277
Cs	Pb	Br	0.00893206	427.457	-32.1127	1.81	1.33	1.82	4.50483	1.8178	0.814856	0.730769	301.59	944	0.79	375.7	600.61	2022	2.33	715.6	265.8	332	2.96	1139.86	1.87	132.905	-0.852602	0.477812	118.03	-0.854626	67.5	2.35	375.7	2.67	45.49	3.34	71.07	3.894	25.1		100	0.24	35.9	2.092	67.74	55	11.35	207.2	-3.58277
Cs	Pb	Cl	0	368.953	-35.5068	1.81	1.33	1.67	4.01878	0.8635	0.820244	0.796407	301.59	944	0.79	375.7	600.61	2022	2.33	715.6	171.6	239.11	3.16	1251.19	1.87	132.905	-0.852602	0.477812	118.03	-0.854626	67.5	2.35	375.7	2.67	45.49	3.34	71.07	3.894	25.1		100	0.24	35.9	2.092	67.74	55	11.35	207.2	-3.58277
Cs	Pb	I	0.0388523	263.886	-14.1775	1.81	1.33	2.06	4.53585	2.8567	0.807228	0.645631	301.59	944	0.79	375.7	600.61	2022	2.33	715.6	386.85	457.4	2.66	1008.39	1.87	132.905	-0.852602	0.477812	118.03	-0.854626	67.5	2.35	375.7	2.67	45.49	3.34	71.07	3.894	25.1		100	0.24	35.9	2.092	67.74	55	11.35	207.2	-3.58277
Cs	Pb	I	0.0158136	1008.7	-57.1707	1.81	1.33	2.06	4.74651	1.6364	0.807228	0.645631	301.59	944	0.79	375.7	600.61	2022	2.33	715.6	386.85	457.4	2.66	1008.39	1.87	132.905	-0.852602	0.477812	118.03	-0.854626	67.5	2.35	375.7	2.67	45.49	3.34	71.07	3.894	25.1		100	0.24	35.9	2.092	67.74	55	11.35	207.2	-3.58277
Cs	Pb	Br	0.00122194	847.074	-64.3797	1.81	1.33	1.82	4.54652	2.0087	0.814856	0.730769	301.59	944	0.79	375.7	600.61	2022	2.33	715.6	265.8	332	2.96	1139.86	1.87	132.905	-0.852602	0.477812	118.03	-0.854626	67.5	2.35	375.7	2.67	45.49	3.34	71.07	3.894	25.1		100	0.24	35.9	2.092	67.74	55	11.35	207.2	-3.58277
Cs	Pb	Cl	0.00220053	376.809	-35.4848	1.81	1.33	1.67	3.935	2.5958	0.820244	0.796407	301.59	944	0.79	375.7	600.61	2022	2.33	715.6	171.6	239.11	3.16	1251.19	1.87	132.905	-0.852602	0.477812	118.03	-0.854626	67.5	2.35	375.7	2.67	45.49	3.34	71.07	3.894	25.1		100	0.24	35.9	2.092	67.74	55	11.35	207.2	-3.58277
K	Sr	I	0	455.454	-30.9925	1.52	1.32	2.06	3.70009	3.7322	0.748947	0.640777	336.53	1032	0.82	418.81	1050	1655	0.95	549.47	386.85	457.4	2.66	1008.39	0.86	39.0983	-1.09652	-0.0540791	72.1	-1.09754	75.6	2.03	418.8	2.35	48.36	2.77	45.46	4.341	31.625	45.72	82	0.757	102.5	2.33	76.9	19	2.54	87.62	-1.67794
Rb	Sr	Cl	0.0094649	352.86	-39.0671	1.66	1.32	1.67	2.63012	4.9009	0.787514	0.790419	312.46	961	0.82	403.03	1050	1655	0.95	549.47	171.6	239.11	3.16	1251.19	1.532	85.4678	-0.961937	0.0908836	88.64	-0.963335	93	2.16	403	2.48	46.89	2.98	55.9	4.177	27.28	40	91	0.363	58.2	2.34	69.2	37	2.54	87.62	-1.67794
Rb	Sr	I	0	480.388	-30.9039	1.66	1.32	2.06	3.82861	3.7486	0.778236	0.640777	312.46	961	0.82	403.03	1050	1655	0.95	549.47	386.85	457.4	2.66	1008.39	1.532	85.4678	-0.961937	0.0908836	88.64	-0.963335	93	2.16	403	2.48	46.89	2.98	55.9	4.177	27.28	40	91	0.363	58.2	2.34	69.2	37	2.54	87.62	-1.67794
Rb	Sr	Cl	0.041044	184.833	-19.3757	1.66	1.32	1.67	2.51055	4.6662	0.787514	0.790419	312.46	961	0.82	403.03	1050	1655	0.95	549.47	171.6	239.11	3.16	1251.19	1.532	85.4678	-0.961937	0.0908836	88.64	-0.963335	93	2.16	403	2.48	46.89	2.98	55.9	4.177	27.28	40	91	0.363	58.2	2.34	69.2	37	2.54	87.62	-1.67794
Rb	Sr	Cl	0.041053	185.312	-19.3756	1.66	1.32	1.67	2.50405	4.6611	0.787514	0.790419	312.46	961	0.82	403.03	1050	1655	0.95	549.47	171.6	239.11	3.16	1251.19	1.532	85.4678	-0.961937	0.0908836	88.64	-0.963335	93	2.16	403	2.48	46.89	2.98	55.9	4.177	27.28	40	91	0.363	58.2	2.34	69.2	37	2.54	87.62	-1.67794
Rb	Sr	Cl	0.000775714	374.232	-39.154	1.66	1.32	1.67	2.47992	5.3613	0.787514	0.790419	312.46	961	0.82	403.03	1050	1655	0.95	549.47	171.6	239.11	3.16	1251.19	1.532	85.4678	-0.961937	0.0908836	88.64	-0.963335	93	2.16	403	2.48	46.89	2.98	55.9	4.177	27.28	40	91	0.363	58.2	2.34	69.2	37	2.54	87.62	-1.67794
Cs	Sr	Cl	0.0128832	188.142	-19.549	1.81	1.32	1.67	2.88507	5.0056	0.822987	0.790419	301.59	944	0.79	375.7	1050	1655	0.95	549.47	171.6	239.11	3.16	1251.19	1.87	132.905	-0.852602	0.477812	118.03	-0.854626	67.5	2.35	375.7	2.67	45.49	3.34	71.07	3.894	25.1		100	0.24	35.9	2.092	67.74	55	2.54	87.62	-1.67794
Cs	Sr	Cl	0.00355414	368.94	-39.1913	1.81	1.32	1.67	2.94251	5.3197	0.822987	0.790419	301.59	944	0.79	375.7	1050	1655	0.95	549.47	171.6	239.11	3.16	1251.19	1.87	132.905	-0.852602	0.477812	118.03	-0.854626	67.5	2.35	375.7	2.67	45.49	3.34	71.07	3.894	25.1		100	0.24	35.9	2.092	67.74	55	2.54	87.62	-1.67794
Cs	Sr	Cl	0	732.88	-78.4537	1.81	1.32	1.67	2.96258	5.3136	0.822987	0.790419	301.59	944	0.79	375.7	1050	1655	0.95	549.47	171.6	239.11	3.16	1251.19	1.87	132.905	-0.852602	0.477812	118.03	-0.854626	67.5	2.35	375.7	2.67	45.49	3.34	71.07	3.894	25.1		100	0.24	35.9	2.092	67.74	55	2.54	87.62	-1.67794
Cs	Sr	Cl	0.0128196	188.072	-19.5493	1.81	1.32	1.67	2.88615	5.0089	0.822987	0.790419	301.59	944	0.79	375.7	1050	1655	0.95	549.47	171.6	239.11	3.16	1251.19	1.87	132.905	-0.852602	0.477812	118.03	-0.854626	67.5	2.35	375.7	2.67	45.49	3.34	71.07	3.894	25.1		100	0.24	35.9	2.092	67.74	55	2.54	87.62	-1.67794
Cs	Sr	Br	0.0195907	220.233	-17.5487	1.81	1.32	1.82	3.47015	4.6964	0.817451	0.725275	301.59	944	0.79	375.7	1050	1655	0.95	549.47	265.8	332	2.96	1139.86	1.87	132.905	-0.852602	0.477812	118.03	-0.854626	67.5	2.35	375.7	2.67	45.49	3.34	71.07	3.894	25.1		100	0.24	35.9	2.092	67.74	55	2.54	87.62	-1.67794
Cs	Sr	Cl	0.00958903	373.434	-39.131	1.81	1.32	1.67	2.9071	5.0264	0.822987	0.790419	301.59	944	0.79	375.7	1050	1655	0.95	549.47	171.6	239.11	3.16	1251.19	1.87	132.905	-0.852602	0.477812	118.03	-0.854626	67.5	2.35	375.7	2.67	45.49	3.34	71.07	3.894	25.1		100	0.24	35.9	2.092	67.74	55	2.54	87.62	-1.67794
Cs	Sr	I	0.0316328	270.812	-15.3317	1.81	1.32	2.06	3.68662	4.0996	0.809616	0.640777	301.59	944	0.79	375.7	1050	1655	0.95	549.47	386.85	457.4	2.66	1008.39	1.87	132.905	-0.852602	0.477812	118.03	-0.854626	67.5	2.35	375.7	2.67	45.49	3.34	71.07	3.894	25.1		100	0.24	35.9	2.092	67.74	55	2.54	87.62	-1.67794
Cs	Sr	I	0	499.667	-30.9798	1.81	1.32	2.06	3.99618	3.8252	0.809616	0.640777	301.59	944	0.79	375.7	1050	1655	0.95	549.47	386.85	457.4	2.66	1008.39	1.87	132.905	-0.852602	0.477812	118.03	-0.854626	67.5	2.35	375.7	2.67	45.49	3.34	71.07	3.894	25.1		100	0.24	35.9	2.092	67.74	55	2.54	87.62	-1.67794
Cs	Sr	Br	0	844.87	-70.5867	1.81	1.32	1.82	3.61827	4.5582	0.817451	0.725275	301.59	944	0.79	375.7	1050	1655	0.95	549.47	265.8	332	2.96	1139.86	1.87	132.905	-0.852602	0.477812	118.03	-0.854626	67.5	2.35	375.7	2.67	45.49	3.34	71.07	3.894	25.1		100	0.24	35.9	2.092	67.74	55	2.54	87.62	-1.67794
Cs	Sr	Br	0.00549962	412.081	-35.2383	1.81	1.32	1.82	3.70918	4.4089	0.817451	0.725275	301.59	944	0.79	375.7	1050	1655	0.95	549.47	265.8	332	2.96	1139.86	1.87	132.905	-0.852602	0.477812	118.03	-0.854626	67.5	2.35	375.7	2.67	45.49	3.34	71.07	3.894	25.1		100	0.24	35.9	2.092	67.74	55	2.54	87.62	-1.67794
Rb	Eu	Cl	0.0374766	180.921	-27.7113	1.66	1.31	1.67	3.15541	0.5872	0.790156	0.784431	312.46	961	0.82	403.03	1099	1800	1.19	547.11	171.6	239.11	3.16	1251.19	1.532	85.4678	-0.961937	0.0908836	88.64	-0.963335	93	2.16	403	2.48	46.89	2.98	55.9	4.177	27.28	40	91	0.363	58.2	2.34	69.2	37	5.24	151.965	-1.82959
Cs	Eu	Cl	0.00662771	183.526	-27.878	1.81	1.31	1.67	3.53983	0.7364	0.825749	0.784431	301.59	944	0.79	375.7	1099	1800	1.19	547.11	171.6	239.11	3.16	1251.19	1.87	132.905	-0.852602	0.477812	118.03	-0.854626	67.5	2.35	375.7	2.67	45.49	3.34	71.07	3.894	25.1		100	0.24	35.9	2.092	67.74	55	5.24	151.965	-1.82959
Cs	Eu	Cl	0	722.691	-111.645	1.81	1.31	1.67	3.59573	0	0.825749	0.784431	301.59	944	0.79	375.7	1099	1800	1.19	547.11	171.6	239.11	3.16	1251.19	1.87	132.905	-0.852602	0.477812	118.03	-0.854626	67.5	2.35	375.7	2.67	45.49	3.34	71.07	3.894	25.1		100	0.24	35.9	2.092	67.74	55	5.24	151.965	-1.82959
Cs	Eu	Br	0	832.698	-103.857	1.81	1.31	1.82	4.18441	1.0355	0.820063	0.71978	301.59	944	0.79	375.7	1099	1800	1.19	547.11	265.8	332	2.96	1139.86	1.87	132.905	-0.852602	0.477812	118.03	-0.854626	67.5	2.35	375.7	2.67	45.49	3.34	71.07	3.894	25.1		100	0.24	35.9	2.092	67.74	55	5.24	151.965	-1.82959
K	Dy	Br	0.144517	682.28	-73.4765	1.52	1.21	1.82	4.29626	0	0.779451	0.664835	336.53	1032	0.82	418.81	1680	2840	1.22	573.03	265.8	332	2.96	1139.86	0.86	39.0983	-1.09652	-0.0540791	72.1	-1.09754	75.6	2.03	418.8	2.35	48.36	2.77	45.46	4.341	31.625	45.72	82	0.757	102.5	2.33	76.9	19	8.55	162.5	-4.45538
K	Dy	I	0.0986238	399.109	-32.8649	1.52	1.21	2.06	4.84555	0	0.774141	0.587379	336.53	1032	0.82	418.81	1680	2840	1.22	573.03	386.85	457.4	2.66	1008.39	0.86	39.0983	-1.09652	-0.0540791	72.1	-1.09754	75.6	2.03	418.8	2.35	48.36	2.77	45.46	4.341	31.625	45.72	82	0.757	102.5	2.33	76.9	19	8.55	162.5	-4.45538
Rb	Dy	Br	0.128707	713.998	-73.2727	1.66	1.21	1.82	4.53677	0	0.812123	0.664835	312.46	961	0.82	403.03	1680	2840	1.22	573.03	265.8	332	2.96	1139.86	1.532	85.4678	-0.961937	0.0908836	88.64	-0.963335	93	2.16	403	2.48	46.89	2.98	55.9	4.177	27.28	40	91	0.363	58.2	2.34	69.2	37	8.55	162.5	-4.45538
Rb	Dy	I	0.125197	860.517	-64.8017	1.66	1.21	2.06	4.85266	0	0.804415	0.587379	312.46	961	0.82	403.03	1680	2840	1.22	573.03	386.85	457.4	2.66	1008.39	1.532	85.4678	-0.961937	0.0908836	88.64	-0.963335	93	2.16	403	2.48	46.89	2.98	55.9	4.177	27.28	40	91	0.363	58.2	2.34	69.2	37	8.55	162.5	-4.45538
Rb	Dy	I	0.0969113	419.803	-32.6837	1.66	1.21	2.06	4.97352	0	0.804415	0.587379	312.46	961	0.82	403.03	1680	2840	1.22	573.03	386.85	457.4	2.66	1008.39	1.532	85.4678	-0.961937	0.0908836	88.64	-0.963335	93	2.16	403	2.48	46.89	2.98	55.9	4.177	27.28	40	91	0.363	58.2	2.34	69.2	37	8.55	162.5	-4.45538
Cs	Dy	I	0.0999406	891.963	-65.2832	1.81	1.21	2.06	5.03483	0	0.836851	0.587379	301.59	944	0.79	375.7	1680	2840	1.22	573.03	386.85	457.4	2.66	1008.39	1.87	132.905	-0.852602	0.477812	118.03	-0.854626	67.5	2.35	375.7	2.67	45.49	3.34	71.07	3.894	25.1		100	0.24	35.9	2.092	67.74	55	8.55	162.5	-4.45538
Cs	Dy	Br	0.0925847	368.306	-36.9246	1.81	1.21	1.82	4.82525	0	0.847128	0.664835	301.59	944	0.79	375.7	1680	2840	1.22	573.03	265.8	332	2.96	1139.86	1.87	132.905	-0.852602	0.477812	118.03	-0.854626	67.5	2.35	375.7	2.67	45.49	3.34	71.07	3.894	25.1		100	0.24	35.9	2.092	67.74	55	8.55	162.5	-4.45538
K	Tm	Br	0.182845	663.893	-71.9546	1.52	1.17	1.82	4.47962	0	0.789878	0.642857	336.53	1032	0.82	418.81	1818	2223	1.25	596.7	265.8	332	2.96	1139.86	0.86	39.0983	-1.09652	-0.0540791	72.1	-1.09754	75.6	2.03	418.8	2.35	48.36	2.77	45.46	4.341	31.625	45.72	82	0.757	102.5	2.33	76.9	19	9.32	168.934	-4.33082
K	Tm	I	0.128077	386.923	-32.1316	1.52	1.17	2.06	5.05339	0	0.783728	0.567961	336.53	1032	0.82	418.81	1818	2223	1.25	596.7	386.85	457.4	2.66	1008.39	0.86	39.0983	-1.09652	-0.0540791	72.1	-1.09754	75.6	2.03	418.8	2.35	48.36	2.77	45.46	4.341	31.625	45.72	82	0.757	102.5	2.33	76.9	19	9.32	168.934	-4.33082
Rb	Tm	I	0.158611	850.395	-63.256	1.66	1.17	2.06	4.96068	0	0.814377	0.567961	312.46	961	0.82	403.03	1818	2223	1.25	596.7	386.85	457.4	2.66	1008.39	1.532	85.4678	-0.961937	0.0908836	88.64	-0.963335	93	2.16	403	2.48	46.89	2.98	55.9	4.177	27.28	40	91	0.363	58.2	2.34	69.2	37	9.32	168.934	-4.33082
Rb	Tm	I	0.055211	795.506	-65.324	1.66	1.17	2.06	5.30296	0.2584	0.814377	0.567961	312.46	961	0.82	403.03	1818	2223	1.25	596.7	386.85	457.4	2.66	1008.39	1.532	85.4678	-0.961937	0.0908836	88.64	-0.963335	93	2.16	403	2.48	46.89	2.98	55.9	4.177	27.28	40	91	0.363	58.2	2.34	69.2	37	9.32	168.934	-4.33082
Rb	Tm	Br	0.162148	685.019	-71.8486	1.66	1.17	1.82	4.79108	0	0.822987	0.642857	312.46	961	0.82	403.03	1818	2223	1.25	596.7	265.8	332	2.96	1139.86	1.532	85.4678	-0.961937	0.0908836	88.64	-0.963335	93	2.16	403	2.48	46.89	2.98	55.9	4.177	27.28	40	91	0.363	58.2	2.34	69.2	37	9.32	168.934	-4.33082
Cs	Tm	Br	0.121909	352.344	-36.2537	1.81	1.17	1.82	5.10449	0	0.858461	0.642857	301.59	944	0.79	375.7	1818	2223	1.25	596.7	265.8	332	2.96	1139.86	1.87	132.905	-0.852602	0.477812	118.03	-0.854626	67.5	2.35	375.7	2.67	45.49	3.34	71.07	3.894	25.1		100	0.24	35.9	2.092	67.74	55	9.32	168.934	-4.33082
Cs	Tm	I	0.203251	880.107	-63.5912	1.81	1.17	2.06	5.15122	0	0.847215	0.567961	301.59	944	0.79	375.7	1818	2223	1.25	596.7	386.85	457.4	2.66	1008.39	1.87	132.905	-0.852602	0.477812	118.03	-0.854626	67.5	2.35	375.7	2.67	45.49	3.34	71.07	3.894	25.1		100	0.24	35.9	2.092	67.74	55	9.32	168.934	-4.33082
Cs	Tm	Cl	0.201506	149.906	-20.2222	1.81	1.17	1.67	4.52169	0	0.866455	0.700599	301.59	944	0.79	375.7	1818	2223	1.25	596.7	171.6	239.11	3.16	1251.19	1.87	132.905	-0.852602	0.477812	118.03	-0.854626	67.5	2.35	375.7	2.67	45.49	3.34	71.07	3.894	25.1		100	0.24	35.9	2.092	67.74	55	9.32	168.934	-4.33082
K	Yb	I	0.0111226	417.311	-30.2728	1.52	1.16	2.06	4.71808	3.6207	0.786162	0.563107	336.53	1032	0.82	418.81	1097	1469	1.26	603.43	386.85	457.4	2.66	1008.39	0.86	39.0983	-1.09652	-0.0540791	72.1	-1.09754	75.6	2.03	418.8	2.35	48.36	2.77	45.46	4.341	31.625	45.72	82	0.757	102.5	2.33	76.9	19	6.97	173.04	-1.46751
K	Yb	Br	0	686.69	-70.0038	1.52	1.16	1.82	4.37062	4.5134	0.792529	0.637363	336.53	1032	0.82	418.81	1097	1469	1.26	603.43	265.8	332	2.96	1139.86	0.86	39.0983	-1.09652	-0.0540791	72.1	-1.09754	75.6	2.03	418.8	2.35	48.36	2.77	45.46	4.341	31.625	45.72	82	0.757	102.5	2.33	76.9	19	6.97	173.04	-1.46751
Rb	Yb	I	0.000825017	869.739	-60.4019	1.66	1.16	2.06	4.8817	3.6062	0.816906	0.563107	312.46	961	0.82	403.03	1097	1469	1.26	603.43	386.85	457.4	2.66	1008.39	1.532	85.4678	-0.961937	0.0908836	88.64	-0.963335	93	2.16	403	2.48	46.89	2.98	55.9	4.177	27.28	40	91	0.363	58.2	2.34	69.2	37	6.97	173.04	-1.46751
Rb	Yb	Br	0	713.898	-69.7229	1.66	1.16	1.82	4.63547	4.4925	0.825749	0.637363	312.46	961	0.82	403.03	1097	1469	1.26	603.43	265.8	332	2.96	1139.86	1.532	85.4678	-0.961937	0.0908836	88.64	-0.963335	93	2.16	403	2.48	46.89	2.98	55.9	4.177	27.28	40	91	0.363	58.2	2.34	69.2	37	6.97	173.04	-1.46751
Cs	Yb	Cl	0	159.725	-19.6431	1.81	1.16	1.67	4.28641	5.3852	0.869516	0.694611	301.59	944	0.79	375.7	1097	1469	1.26	603.43	171.6	239.11	3.16	1251.19	1.87	132.905	-0.852602	0.477812	118.03	-0.854626	67.5	2.35	375.7	2.67	45.49	3.34	71.07	3.894	25.1		100	0.24	35.9	2.092	67.74	55	6.97	173.04	-1.46751
Cs	Yb	I	0	933.597	-60.4803	1.81	1.16	2.06	4.88529	3.8114	0.849846	0.563107	301.59	944	0.79	375.7	1097	1469	1.26	603.43	386.85	457.4	2.66	1008.39	1.87	132.905	-0.852602	0.477812	118.03	-0.854626	67.5	2.35	375.7	2.67	45.49	3.34	71.07	3.894	25.1		100	0.24	35.9	2.092	67.74	55	6.97	173.04	-1.46751
Cs	Yb	Br	0	188.853	-17.4735	1.81	1.16	1.82	4.79783	4.397	0.861341	0.637363	301.59	944	0.79	375.7	1097	1469	1.26	603.43	265.8	332	2.96	1139.86	1.87	132.905	-0.852602	0.477812	118.03	-0.854626	67.5	2.35	375.7	2.67	45.49	3.34	71.07	3.894	25.1		100	0.24	35.9	2.092	67.74	55	6.97	173.04	-1.46751
K	Ca	Br	0	337.44	-35.5858	1.52	1.14	1.82	3.1385	4.416	0.797884	0.626374	336.53	1032	0.82	418.81	1115	1757	1	589.83	265.8	332	2.96	1139.86	0.86	39.0983	-1.09652	-0.0540791	72.1	-1.09754	75.6	2.03	418.8	2.35	48.36	2.77	45.46	4.341	31.625	45.72	82	0.757	102.5	2.33	76.9	19	1.55	40.078	-1.92726
K	Ca	Cl	0.0457256	156.898	-19.6458	1.52	1.14	1.67	1.96362	4.8166	0.80273	0.682635	336.53	1032	0.82	418.81	1115	1757	1	589.83	171.6	239.11	3.16	1251.19	0.86	39.0983	-1.09652	-0.0540791	72.1	-1.09754	75.6	2.03	418.8	2.35	48.36	2.77	45.46	4.341	31.625	45.72	82	0.757	102.5	2.33	76.9	19	1.55	40.078	-1.92726
K	Ca	I	0.0115271	421.268	-31.0751	1.52	1.14	2.06	3.62556	3.6043	0.791076	0.553398	336.53	1032	0.82	418.81	1115	1757	1	589.83	386.85	457.4	2.66	1008.39	0.86	39.0983	-1.09652	-0.0540791	72.1	-1.09754	75.6	2.03	418.8	2.35	48.36	2.77	45.46	4.341	31.625	45.72	82	0.757	102.5	2.33	76.9	19	1.55	40.078	-1.92726
K	Ca	Cl	0	587.947	-79.4978	1.52	1.14	1.67	2.09603	5.5653	0.80273	0.682635	336.53	1032	0.82	418.81	1115	1757	1	589.83	171.6	239.11	3.16	1251.19	0.86	39.0983	-1.09652	-0.0540791	72.1	-1.09754	75.6	2.03	418.8	2.35	48.36	2.77	45.46	4.341	31.625	45.72	82	0.757	102.5	2.33	76.9	19	1.55	40.078	-1.92726
K	Ca	Br	0.000388169	699.752	-71.1639	1.52	1.14	1.82	3.02694	4.5933	0.797884	0.626374	336.53	1032	0.82	418.81	1115	1757	1	589.83	265.8	332	2.96	1139.86	0.86	39.0983	-1.09652	-0.0540791	72.1	-1.09754	75.6	2.03	418.8	2.35	48.36	2.77	45.46	4.341	31.625	45.72	82	0.757	102.5	2.33	76.9	19	1.55	40.078	-1.92726
K	Ca	Br	0.0545504	187.132	-17.5202	1.52	1.14	1.82	2.8297	3.9584	0.797884	0.626374	336.53	1032	0.82	418.81	1115	1757	1	589.83	265.8	332	2.96	1139.86	0.86	39.0983	-1.09652	-0.0540791	72.1	-1.09754	75.6	2.03	418.8	2.35	48.36	2.77	45.46	4.341	31.625	45.72	82	0.757	102.5	2.33	76.9	19	1.55	40.078	-1.92726
K	Ca	Cl	0.0456587	158.085	-19.6462	1.52	1.14	1.67	1.94888	4.799	0.80273	0.682635	336.53	1032	0.82	418.81	1115	1757	1	589.83	171.6	239.11	3.16	1251.19	0.86	39.0983	-1.09652	-0.0540791	72.1	-1.09754	75.6	2.03	418.8	2.35	48.36	2.77	45.46	4.341	31.625	45.72	82	0.757	102.5	2.33	76.9	19	1.55	40.078	-1.92726
K	Ca	Cl	0.00415204	320.002	-39.7074	1.52	1.14	1.67	1.92554	5.6343	0.80273	0.682635	336.53	1032	0.82	418.81	1115	1757	1	589.83	171.6	239.11	3.16	1251.19	0.86	39.0983	-1.09652	-0.0540791	72.1	-1.09754	75.6	2.03	418.8	2.35	48.36	2.77	45.46	4.341	31.625	45.72	82	0.757	102.5	2.33	76.9	19	1.55	40.078	-1.92726
Rb	Ca	Br	0.000783166	712.999	-70.8466	1.66	1.14	1.82	3.40267	4.3001	0.831328	0.626374	312.46	961	0.82	403.03	1115	1757	1	589.83	265.8	332	2.96	1139.86	1.532	85.4678	-0.961937	0.0908836	88.64	-0.963335	93	2.16	403	2.48	46.89	2.98	55.9	4.177	27.28	40	91	0.363	58.2	2.34	69.2	37	1.55	40.078	-1.92726
Rb	Ca	Cl	0	314.487	-39.5118	1.66	1.14	1.67	2.44899	5.4138	0.837959	0.682635	312.46	961	0.82	403.03	1115	1757	1	589.83	171.6	239.11	3.16	1251.19	1.532	85.4678	-0.961937	0.0908836	88.64	-0.963335	93	2.16	403	2.48	46.89	2.98	55.9	4.177	27.28	40	91	0.363	58.2	2.34	69.2	37	1.55	40.078	-1.92726
Rb	Ca	Br	0	723.127	-70.8623	1.66	1.14	1.82	3.35501	4.6259	0.831328	0.626374	312.46	961	0.82	403.03	1115	1757	1	589.83	265.8	332	2.96	1139.86	1.532	85.4678	-0.961937	0.0908836	88.64	-0.963335	93	2.16	403	2.48	46.89	2.98	55.9	4.177	27.28	40	91	0.363	58.2	2.34	69.2	37	1.55	40.078	-1.92726
Rb	Ca	Cl	0.010448	159.695	-19.7037	1.66	1.14	1.67	2.41139	5.01	0.837959	0.682635	312.46	961	0.82	403.03	1115	1757	1	589.83	171.6	239.11	3.16	1251.19	1.532	85.4678	-0.961937	0.0908836	88.64	-0.963335	93	2.16	403	2.48	46.89	2.98	55.9	4.177	27.28	40	91	0.363	58.2	2.34	69.2	37	1.55	40.078	-1.92726
Rb	Ca	I	0.0459766	239.404	-15.2671	1.66	1.14	2.06	3.51148	3.8858	0.822012	0.553398	312.46	961	0.82	403.03	1115	1757	1	589.83	386.85	457.4	2.66	1008.39	1.532	85.4678	-0.961937	0.0908836	88.64	-0.963335	93	2.16	403	2.48	46.89	2.98	55.9	4.177	27.28	40	91	0.363	58.2	2.34	69.2	37	1.55	40.078	-1.92726
Rb	Ca	Br	0.0241585	189.335	-17.5948	1.66	1.14	1.82	3.20344	4.1307	0.831328	0.626374	312.46	961	0.82	403.03	1115	1757	1	589.83	265.8	332	2.96	1139.86	1.532	85.4678	-0.961937	0.0908836	88.64	-0.963335	93	2.16	403	2.48	46.89	2.98	55.9	4.177	27.28	40	91	0.363	58.2	2.34	69.2	37	1.55	40.078	-1.92726
Rb	Ca	I	0	878.948	-61.9879	1.66	1.14	2.06	3.82577	3.5948	0.822012	0.553398	312.46	961	0.82	403.03	1115	1757	1	589.83	386.85	457.4	2.66	1008.39	1.532	85.4678	-0.961937	0.0908836	88.64	-0.963335	93	2.16	403	2.48	46.89	2.98	55.9	4.177	27.28	40	91	0.363	58.2	2.34	69.2	37	1.55	40.078	-1.92726
Rb	Ca	Br	0.0236613	188.792	-17.5973	1.66	1.14	1.82	3.21266	4.1416	0.831328	0.626374	312.46	961	0.82	403.03	1115	1757	1	589.83	265.8	332	2.96	1139.86	1.532	85.4678	-0.961937	0.0908836	88.64	-0.963335	93	2.16	403	2.48	46.89	2.98	55.9	4.177	27.28	40	91	0.363	58.2	2.34	69.2	37	1.55	40.078	-1.92726
Cs	Ca	Cl	0.000283806	163.022	-19.8149	1.81	1.14	1.67	2.84538	5.3456	0.875705	0.682635	301.59	944	0.79	375.7	1115	1757	1	589.83	171.6	239.11	3.16	1251.19	1.87	132.905	-0.852602	0.477812	118.03	-0.854626	67.5	2.35	375.7	2.67	45.49	3.34	71.07	3.894	25.1		100	0.24	35.9	2.092	67.74	55	1.55	40.078	-1.92726
Cs	Ca	Cl	0	163.544	-19.8163	1.81	1.14	1.67	2.83629	5.3829	0.875705	0.682635	301.59	944	0.79	375.7	1115	1757	1	589.83	171.6	239.11	3.16	1251.19	1.87	132.905	-0.852602	0.477812	118.03	-0.854626	67.5	2.35	375.7	2.67	45.49	3.34	71.07	3.894	25.1		100	0.24	35.9	2.092	67.74	55	1.55	40.078	-1.92726
Cs	Ca	I	0.0102404	948.409	-62.0097	1.81	1.14	2.06	3.8778	3.9934	0.855157	0.553398	301.59	944	0.79	375.7	1115	1757	1	589.83	386.85	457.4	2.66	1008.39	1.87	132.905	-0.852602	0.477812	118.03	-0.854626	67.5	2.35	375.7	2.67	45.49	3.34	71.07	3.894	25.1		100	0.24	35.9	2.092	67.74	55	1.55	40.078	-1.92726
Cs	Ca	Br	0	192.361	-17.7425	1.81	1.14	1.82	3.56256	4.4485	0.867161	0.626374	301.59	944	0.79	375.7	1115	1757	1	589.83	265.8	332	2.96	1139.86	1.87	132.905	-0.852602	0.477812	118.03	-0.854626	67.5	2.35	375.7	2.67	45.49	3.34	71.07	3.894	25.1		100	0.24	35.9	2.092	67.74	55	1.55	40.078	-1.92726
Cs	Ca	I	0.0208876	242.222	-15.4492	1.81	1.14	2.06	3.79583	3.9901	0.855157	0.553398	301.59	944	0.79	375.7	1115	1757	1	589.83	386.85	457.4	2.66	1008.39	1.87	132.905	-0.852602	0.477812	118.03	-0.854626	67.5	2.35	375.7	2.67	45.49	3.34	71.07	3.894	25.1		100	0.24	35.9	2.092	67.74	55	1.55	40.078	-1.92726
Cs	Ca	I	0	932.399	-62.2145	1.81	1.14	2.06	3.94439	3.6642	0.855157	0.553398	301.59	944	0.79	375.7	1115	1757	1	589.83	386.85	457.4	2.66	1008.39	1.87	132.905	-0.852602	0.477812	118.03	-0.854626	67.5	2.35	375.7	2.67	45.49	3.34	71.07	3.894	25.1		100	0.24	35.9	2.092	67.74	55	1.55	40.078	-1.92726
Cs	Ca	Cl	0.000299061	325.993	-39.6297	1.81	1.14	1.67	2.84582	5.6143	0.875705	0.682635	301.59	944	0.79	375.7	1115	1757	1	589.83	171.6	239.11	3.16	1251.19	1.87	132.905	-0.852602	0.477812	118.03	-0.854626	67.5	2.35	375.7	2.67	45.49	3.34	71.07	3.894	25.1		100	0.24	35.9	2.092	67.74	55	1.55	40.078	-1.92726
K	Cd	Cl	0	546.826	-59.3638	1.52	1.09	1.67	3.13226	3.5288	0.817272	0.652695	336.53	1032	0.82	418.81	594.22	1040	1.69	867.77	171.6	239.11	3.16	1251.19	0.86	39.0983	-1.09652	-0.0540791	72.1	-1.09754	75.6	2.03	418.8	2.35	48.36	2.77	45.46	4.341	31.625	45.72	82	0.757	102.5	2.33	76.9	19	8.65	112.41	-0.740339
Rb	Cd	Cl	0	581.1	-58.978	1.66	1.09	1.67	3.47753	3.5695	0.85314	0.652695	312.46	961	0.82	403.03	594.22	1040	1.69	867.77	171.6	239.11	3.16	1251.19	1.532	85.4678	-0.961937	0.0908836	88.64	-0.963335	93	2.16	403	2.48	46.89	2.98	55.9	4.177	27.28	40	91	0.363	58.2	2.34	69.2	37	8.65	112.41	-0.740339
Rb	Cd	Br	0	675.154	-52.2045	1.66	1.09	1.82	4.30501	2.7555	0.845612	0.598901	312.46	961	0.82	403.03	594.22	1040	1.69	867.77	265.8	332	2.96	1139.86	1.532	85.4678	-0.961937	0.0908836	88.64	-0.963335	93	2.16	403	2.48	46.89	2.98	55.9	4.177	27.28	40	91	0.363	58.2	2.34	69.2	37	8.65	112.41	-0.740339
Cs	Cd	Cl	0.00746662	151.406	-14.69	1.81	1.09	1.67	3.85699	1.8515	0.891569	0.652695	301.59	944	0.79	375.7	594.22	1040	1.69	867.77	171.6	239.11	3.16	1251.19	1.87	132.905	-0.852602	0.477812	118.03	-0.854626	67.5	2.35	375.7	2.67	45.49	3.34	71.07	3.894	25.1		100	0.24	35.9	2.092	67.74	55	8.65	112.41	-0.740339
Cs	Cd	Cl	0	937.897	-88.3638	1.81	1.09	1.67	3.73583	2.4921	0.891569	0.652695	301.59	944	0.79	375.7	594.22	1040	1.69	867.77	171.6	239.11	3.16	1251.19	1.87	132.905	-0.852602	0.477812	118.03	-0.854626	67.5	2.35	375.7	2.67	45.49	3.34	71.07	3.894	25.1		100	0.24	35.9	2.092	67.74	55	8.65	112.41	-0.740339
Cs	Cd	Br	0	371.816	-26.2084	1.81	1.09	1.82	4.3323	2.901	0.882061	0.598901	301.59	944	0.79	375.7	594.22	1040	1.69	867.77	265.8	332	2.96	1139.86	1.87	132.905	-0.852602	0.477812	118.03	-0.854626	67.5	2.35	375.7	2.67	45.49	3.34	71.07	3.894	25.1		100	0.24	35.9	2.092	67.74	55	8.65	112.41	-0.740339
Cs	Cd	Br	0.0326962	177.811	-12.9407	1.81	1.09	1.82	4.52958	0.7607	0.882061	0.598901	301.59	944	0.79	375.7	594.22	1040	1.69	867.77	265.8	332	2.96	1139.86	1.87	132.905	-0.852602	0.477812	118.03	-0.854626	67.5	2.35	375.7	2.67	45.49	3.34	71.07	3.894	25.1		100	0.24	35.9	2.092	67.74	55	8.65	112.41	-0.740339
K	Ag	Br	0	313.68	-26.3348	1.52	1.08	1.82	4.09395	0	0.814392	0.593407	336.53	1032	0.82	418.81	1234.93	2435	1.93	731	265.8	332	2.96	1139.86	0.86	39.0983	-1.09652	-0.0540791	72.1	-1.09754	75.6	2.03	418.8	2.35	48.36	2.77	45.46	4.341	31.625	45.72	82	0.757	102.5	2.33	76.9	19	10.5	107.868	-2.71998
K	Ag	Br	0.00269502	159.031	-13.1539	1.52	1.08	1.82	4.03756	0	0.814392	0.593407	336.53	1032	0.82	418.81	1234.93	2435	1.93	731	265.8	332	2.96	1139.86	0.86	39.0983	-1.09652	-0.0540791	72.1	-1.09754	75.6	2.03	418.8	2.35	48.36	2.77	45.46	4.341	31.625	45.72	82	0.757	102.5	2.33	76.9	19	10.5	107.868	-2.71998
K	Ag	Cl	0	135.467	-14.6214	1.52	1.08	1.67	3.10524	0	0.820244	0.646707	336.53	1032	0.82	418.81	1234.93	2435	1.93	731	171.6	239.11	3.16	1251.19	0.86	39.0983	-1.09652	-0.0540791	72.1	-1.09754	75.6	2.03	418.8	2.35	48.36	2.77	45.46	4.341	31.625	45.72	82	0.757	102.5	2.33	76.9	19	10.5	107.868	-2.71998
K	Ag	Cl	5.64e-05	267.694	-29.2422	1.52	1.08	1.67	3.14281	0	0.820244	0.646707	336.53	1032	0.82	418.81	1234.93	2435	1.93	731	171.6	239.11	3.16	1251.19	0.86	39.0983	-1.09652	-0.0540791	72.1	-1.09754	75.6	2.03	418.8	2.35	48.36	2.77	45.46	4.341	31.625	45.72	82	0.757	102.5	2.33	76.9	19	10.5	107.868	-2.71998
Rb	Ag	Cl	0	137.971	-14.621	1.66	1.08	1.67	3.60696	0	0.856242	0.646707	312.46	961	0.82	403.03	1234.93	2435	1.93	731	171.6	239.11	3.16	1251.19	1.532	85.4678	-0.961937	0.0908836	88.64	-0.963335	93	2.16	403	2.48	46.89	2.98	55.9	4.177	27.28	40	91	0.363	58.2	2.34	69.2	37	10.5	107.868	-2.71998
Rb	Ag	Br	0	161.605	-13.1506	1.66	1.08	1.82	4.44969	0	0.848528	0.593407	312.46	961	0.82	403.03	1234.93	2435	1.93	731	265.8	332	2.96	1139.86	1.532	85.4678	-0.961937	0.0908836	88.64	-0.963335	93	2.16	403	2.48	46.89	2.98	55.9	4.177	27.28	40	91	0.363	58.2	2.34	69.2	37	10.5	107.868	-2.71998
Cs	Ag	Br	0	165.986	-13.2073	1.81	1.08	1.82	4.80682	0	0.885103	0.593407	301.59	944	0.79	375.7	1234.93	2435	1.93	731	265.8	332	2.96	1139.86	1.87	132.905	-0.852602	0.477812	118.03	-0.854626	67.5	2.35	375.7	2.67	45.49	3.34	71.07	3.894	25.1		100	0.24	35.9	2.092	67.74	55	10.5	107.868	-2.71998
Cs	Ag	Cl	0	301.805	-29.3459	1.81	1.08	1.67	3.81987	0	0.894811	0.646707	301.59	944	0.79	375.7	1234.93	2435	1.93	731	171.6	239.11	3.16	1251.19	1.87	132.905	-0.852602	0.477812	118.03	-0.854626	67.5	2.35	375.7	2.67	45.49	3.34	71.07	3.894	25.1		100	0.24	35.9	2.092	67.74	55	10.5	107.868	-2.71998
Li	Ti	Cl	0.275965	124.401	-21.9458	0.9	1	1.67	2.15129	0	0.680623	0.598802	453.69	1615	0.98	520.22	1941	3560	1.54	658.81	171.6	239.11	3.16	1251.19	0.53	6.941	-1.86553	0.227209	16.51	-1.86989	21.6	1.23	520	1.55	59.8	2.05	13.1	5.392	76.638	122.451	46	3.582	84.7	3	147.1	3	4.54	47.88	-7.66127
Li	Ti	Cl	0.0950641	537.646	-91.4013	0.9	1	1.67	1.99108	0	0.680623	0.598802	453.69	1615	0.98	520.22	1941	3560	1.54	658.81	171.6	239.11	3.16	1251.19	0.53	6.941	-1.86553	0.227209	16.51	-1.86989	21.6	1.23	520	1.55	59.8	2.05	13.1	5.392	76.638	122.451	46	3.582	84.7	3	147.1	3	4.54	47.88	-7.66127
K	Ti	Br	0.0131577	921.941	-123.949	1.52	1	1.82	3.53034	0	0.837495	0.549451	336.53	1032	0.82	418.81	1941	3560	1.54	658.81	265.8	332	2.96	1139.86	0.86	39.0983	-1.09652	-0.0540791	72.1	-1.09754	75.6	2.03	418.8	2.35	48.36	2.77	45.46	4.341	31.625	45.72	82	0.757	102.5	2.33	76.9	19	4.54	47.88	-7.66127
K	Ti	Cl	0.0119153	778.402	-136.629	1.52	1	1.67	2.47447	0	0.84482	0.598802	336.53	1032	0.82	418.81	1941	3560	1.54	658.81	171.6	239.11	3.16	1251.19	0.86	39.0983	-1.09652	-0.0540791	72.1	-1.09754	75.6	2.03	418.8	2.35	48.36	2.77	45.46	4.341	31.625	45.72	82	0.757	102.5	2.33	76.9	19	4.54	47.88	-7.66127
K	Ti	I	0.118701	1192.13	-108.673	1.52	1	2.06	3.90863	0	0.827269	0.485437	336.53	1032	0.82	418.81	1941	3560	1.54	658.81	386.85	457.4	2.66	1008.39	0.86	39.0983	-1.09652	-0.0540791	72.1	-1.09754	75.6	2.03	418.8	2.35	48.36	2.77	45.46	4.341	31.625	45.72	82	0.757	102.5	2.33	76.9	19	4.54	47.88	-7.66127
Rb	Pd	Br	0	148.246	-15.6221	1.66	1	1.82	4.83445	0	0.8726	0.549451	312.46	961	0.82	403.03	1828.05	3236	2.2	804.38	265.8	332	2.96	1139.86	1.532	85.4678	-0.961937	0.0908836	88.64	-0.963335	93	2.16	403	2.48	46.89	2.98	55.9	4.177	27.28	40	91	0.363	58.2	2.34	69.2	37	12	106.42	-5.09101
Rb	Ti	Cl	0.013514	266.978	-45.0911	1.66	1	1.67	2.98167	0	0.881897	0.598802	312.46	961	0.82	403.03	1941	3560	1.54	658.81	171.6	239.11	3.16	1251.19	1.532	85.4678	-0.961937	0.0908836	88.64	-0.963335	93	2.16	403	2.48	46.89	2.98	55.9	4.177	27.28	40	91	0.363	58.2	2.34	69.2	37	4.54	47.88	-7.66127
Rb	Ti	I	0.0670293	1213.18	-109.629	1.66	1	2.06	4.22162	0	0.85962	0.485437	312.46	961	0.82	403.03	1941	3560	1.54	658.81	386.85	457.4	2.66	1008.39	1.532	85.4678	-0.961937	0.0908836	88.64	-0.963335	93	2.16	403	2.48	46.89	2.98	55.9	4.177	27.28	40	91	0.363	58.2	2.34	69.2	37	4.54	47.88	-7.66127
Rb	Ti	Br	0	314.797	-41.2443	1.66	1	1.82	3.9356	0	0.8726	0.549451	312.46	961	0.82	403.03	1941	3560	1.54	658.81	265.8	332	2.96	1139.86	1.532	85.4678	-0.961937	0.0908836	88.64	-0.963335	93	2.16	403	2.48	46.89	2.98	55.9	4.177	27.28	40	91	0.363	58.2	2.34	69.2	37	4.54	47.88	-7.66127
Rb	Pd	Cl	0.0432913	125.491	-17.0498	1.66	1	1.67	3.94652	0	0.881897	0.598802	312.46	961	0.82	403.03	1828.05	3236	2.2	804.38	171.6	239.11	3.16	1251.19	1.532	85.4678	-0.961937	0.0908836	88.64	-0.963335	93	2.16	403	2.48	46.89	2.98	55.9	4.177	27.28	40	91	0.363	58.2	2.34	69.2	37	12	106.42	-5.09101
Cs	Pd	Br	0	151.64	-15.6091	1.81	1	1.82	5.24573	0	0.910212	0.549451	301.59	944	0.79	375.7	1828.05	3236	2.2	804.38	265.8	332	2.96	1139.86	1.87	132.905	-0.852602	0.477812	118.03	-0.854626	67.5	2.35	375.7	2.67	45.49	3.34	71.07	3.894	25.1		100	0.24	35.9	2.092	67.74	55	12	106.42	-5.09101
Cs	Pd	Cl	0.0521971	129.802	-16.9828	1.81	1	1.67	4.42229	0	0.921622	0.598802	301.59	944	0.79	375.7	1828.05	3236	2.2	804.38	171.6	239.11	3.16	1251.19	1.87	132.905	-0.852602	0.477812	118.03	-0.854626	67.5	2.35	375.7	2.67	45.49	3.34	71.07	3.894	25.1		100	0.24	35.9	2.092	67.74	55	12	106.42	-5.09101
Cs	Ti	Cl	0.00949384	287.956	-45.5608	1.81	1	1.67	3.31157	0	0.921622	0.598802	301.59	944	0.79	375.7	1941	3560	1.54	658.81	171.6	239.11	3.16	1251.19	1.87	132.905	-0.852602	0.477812	118.03	-0.854626	67.5	2.35	375.7	2.67	45.49	3.34	71.07	3.894	25.1		100	0.24	35.9	2.092	67.74	55	4.54	47.88	-7.66127
Cs	Ti	Br	0	339.397	-41.3344	1.81	1	1.82	4.11454	0	0.910212	0.549451	301.59	944	0.79	375.7	1941	3560	1.54	658.81	265.8	332	2.96	1139.86	1.87	132.905	-0.852602	0.477812	118.03	-0.854626	67.5	2.35	375.7	2.67	45.49	3.34	71.07	3.894	25.1		100	0.24	35.9	2.092	67.74	55	4.54	47.88	-7.66127
Cs	Pd	Cl	0.00970557	689.468	-68.7812	1.81	1	1.67	3.33023	1.6597	0.921622	0.598802	301.59	944	0.79	375.7	1828.05	3236	2.2	804.38	171.6	239.11	3.16	1251.19	1.87	132.905	-0.852602	0.477812	118.03	-0.854626	67.5	2.35	375.7	2.67	45.49	3.34	71.07	3.894	25.1		100	0.24	35.9	2.092	67.74	55	12	106.42	-5.09101
Cs	Ti	I	0.00949233	421.716	-37.1065	1.81	1	2.06	4.42179	0	0.894282	0.485437	301.59	944	0.79	375.7	1941	3560	1.54	658.81	386.85	457.4	2.66	1008.39	1.87	132.905	-0.852602	0.477812	118.03	-0.854626	67.5	2.35	375.7	2.67	45.49	3.34	71.07	3.894	25.1		100	0.24	35.9	2.092	67.74	55	4.54	47.88	-7.66127
Cs	Pd	Br	0.00675006	151.878	-15.5754	1.81	1	1.82	5.23748	0	0.910212	0.549451	301.59	944	0.79	375.7	1828.05	3236	2.2	804.38	265.8	332	2.96	1139.86	1.87	132.905	-0.852602	0.477812	118.03	-0.854626	67.5	2.35	375.7	2.67	45.49	3.34	71.07	3.894	25.1		100	0.24	35.9	2.092	67.74	55	12	106.42	-5.09101
Na	Mn	Cl	0.00700407	240.346	-45.7662	1.16	0.97	1.67	2.54646	0.3063	0.757997	0.580838	370.87	1156	0.93	495.85	1519	2334	1.55	717.28	171.6	239.11	3.16	1251.19	0.97	22.9898	-1.25448	1.31525	29.21	-1.26024	39.7	1.54	495.8	1.9	52.7	2.23	23.7	5.139	47.286	71.641	71	1.23	141	2.601	98.01	11	7.44	54.938	-8.87041
K	Mn	Cl	0.474652	509.053	-82.5172	1.52	0.97	1.67	2.61477	0	0.854421	0.580838	336.53	1032	0.82	418.81	1519	2334	1.55	717.28	171.6	239.11	3.16	1251.19	0.86	39.0983	-1.09652	-0.0540791	72.1	-1.09754	75.6	2.03	418.8	2.35	48.36	2.77	45.46	4.341	31.625	45.72	82	0.757	102.5	2.33	76.9	19	7.44	54.938	-8.87041
K	Mn	Cl	0	507.063	-92.0149	1.52	0.97	1.67	2.62503	0	0.854421	0.580838	336.53	1032	0.82	418.81	1519	2334	1.55	717.28	171.6	239.11	3.16	1251.19	0.86	39.0983	-1.09652	-0.0540791	72.1	-1.09754	75.6	2.03	418.8	2.35	48.36	2.77	45.46	4.341	31.625	45.72	82	0.757	102.5	2.33	76.9	19	7.44	54.938	-8.87041
K	Mn	Br	0.00133099	599.181	-84.5585	1.52	0.97	1.82	3.69973	1.7859	0.846501	0.532967	336.53	1032	0.82	418.81	1519	2334	1.55	717.28	265.8	332	2.96	1139.86	0.86	39.0983	-1.09652	-0.0540791	72.1	-1.09754	75.6	2.03	418.8	2.35	48.36	2.77	45.46	4.341	31.625	45.72	82	0.757	102.5	2.33	76.9	19	7.44	54.938	-8.87041
Rb	Mn	Br	0	331.636	-38.2993	1.66	0.97	1.82	3.80659	0	0.881983	0.532967	312.46	961	0.82	403.03	1519	2334	1.55	717.28	265.8	332	2.96	1139.86	1.532	85.4678	-0.961937	0.0908836	88.64	-0.963335	93	2.16	403	2.48	46.89	2.98	55.9	4.177	27.28	40	91	0.363	58.2	2.34	69.2	37	7.44	54.938	-8.87041
Rb	Mn	Br	0.151477	995.615	-122.113	1.66	0.97	1.82	3.80388	1.2465	0.881983	0.532967	312.46	961	0.82	403.03	1519	2334	1.55	717.28	265.8	332	2.96	1139.86	1.532	85.4678	-0.961937	0.0908836	88.64	-0.963335	93	2.16	403	2.48	46.89	2.98	55.9	4.177	27.28	40	91	0.363	58.2	2.34	69.2	37	7.44	54.938	-8.87041
Rb	Mn	Cl	0	814.496	-137.788	1.66	0.97	1.67	3.01852	1.3114	0.891919	0.580838	312.46	961	0.82	403.03	1519	2334	1.55	717.28	171.6	239.11	3.16	1251.19	1.532	85.4678	-0.961937	0.0908836	88.64	-0.963335	93	2.16	403	2.48	46.89	2.98	55.9	4.177	27.28	40	91	0.363	58.2	2.34	69.2	37	7.44	54.938	-8.87041
Cs	Mn	Cl	0	439.107	-69.153	1.81	0.97	1.67	3.33769	1.5002	0.932095	0.580838	301.59	944	0.79	375.7	1519	2334	1.55	717.28	171.6	239.11	3.16	1251.19	1.87	132.905	-0.852602	0.477812	118.03	-0.854626	67.5	2.35	375.7	2.67	45.49	3.34	71.07	3.894	25.1		100	0.24	35.9	2.092	67.74	55	7.44	54.938	-8.87041
Cs	Mn	I	0.00214889	424.329	-38.3421	1.81	0.97	2.06	4.4499	0	0.903136	0.470874	301.59	944	0.79	375.7	1519	2334	1.55	717.28	386.85	457.4	2.66	1008.39	1.87	132.905	-0.852602	0.477812	118.03	-0.854626	67.5	2.35	375.7	2.67	45.49	3.34	71.07	3.894	25.1		100	0.24	35.9	2.092	67.74	55	7.44	54.938	-8.87041
Cs	Mn	Br	0	352.816	-42.4352	1.81	0.97	1.82	4.02461	0	0.919999	0.532967	301.59	944	0.79	375.7	1519	2334	1.55	717.28	265.8	332	2.96	1139.86	1.87	132.905	-0.852602	0.477812	118.03	-0.854626	67.5	2.35	375.7	2.67	45.49	3.34	71.07	3.894	25.1		100	0.24	35.9	2.092	67.74	55	7.44	54.938	-8.87041
K	Cr	Cl	0.0222401	123.17	-23.1212	1.52	0.94	1.67	2.662	0	0.864242	0.562874	336.53	1032	0.82	418.81	2180	2944	1.66	652.87	171.6	239.11	3.16	1251.19	0.86	39.0983	-1.09652	-0.0540791	72.1	-1.09754	75.6	2.03	418.8	2.35	48.36	2.77	45.46	4.341	31.625	45.72	82	0.757	102.5	2.33	76.9	19	7.19	51.996	-9.50481
K	Cr	Cl	0.0207658	244.752	-46.2572	1.52	0.94	1.67	2.67927	0	0.864242	0.562874	336.53	1032	0.82	418.81	2180	2944	1.66	652.87	171.6	239.11	3.16	1251.19	0.86	39.0983	-1.09652	-0.0540791	72.1	-1.09754	75.6	2.03	418.8	2.35	48.36	2.77	45.46	4.341	31.625	45.72	82	0.757	102.5	2.33	76.9	19	7.19	51.996	-9.50481
Rb	Cr	Cl	0.0196193	573.172	-92.1479	1.66	0.94	1.67	2.82552	0.5143	0.902171	0.562874	312.46	961	0.82	403.03	2180	2944	1.66	652.87	171.6	239.11	3.16	1251.19	1.532	85.4678	-0.961937	0.0908836	88.64	-0.963335	93	2.16	403	2.48	46.89	2.98	55.9	4.177	27.28	40	91	0.363	58.2	2.34	69.2	37	7.19	51.996	-9.50481
Rb	Cr	Cl	0.0283209	277.235	-45.9869	1.66	0.94	1.67	2.92083	0.1299	0.902171	0.562874	312.46	961	0.82	403.03	2180	2944	1.66	652.87	171.6	239.11	3.16	1251.19	1.532	85.4678	-0.961937	0.0908836	88.64	-0.963335	93	2.16	403	2.48	46.89	2.98	55.9	4.177	27.28	40	91	0.363	58.2	2.34	69.2	37	7.19	51.996	-9.50481
Rb	Cr	Cl	0.0216005	570.423	-92.1082	1.66	0.94	1.67	2.83914	0.4181	0.902171	0.562874	312.46	961	0.82	403.03	2180	2944	1.66	652.87	171.6	239.11	3.16	1251.19	1.532	85.4678	-0.961937	0.0908836	88.64	-0.963335	93	2.16	403	2.48	46.89	2.98	55.9	4.177	27.28	40	91	0.363	58.2	2.34	69.2	37	7.19	51.996	-9.50481
Rb	Cr	I	0.0635869	818.172	-76.2817	1.66	0.94	2.06	4.20671	0.1919	0.876812	0.456311	312.46	961	0.82	403.03	2180	2944	1.66	652.87	386.85	457.4	2.66	1008.39	1.532	85.4678	-0.961937	0.0908836	88.64	-0.963335	93	2.16	403	2.48	46.89	2.98	55.9	4.177	27.28	40	91	0.363	58.2	2.34	69.2	37	7.19	51.996	-9.50481
Rb	Cr	I	0.0675407	396.637	-38.1013	1.66	0.94	2.06	4.33875	0	0.876812	0.456311	312.46	961	0.82	403.03	2180	2944	1.66	652.87	386.85	457.4	2.66	1008.39	1.532	85.4678	-0.961937	0.0908836	88.64	-0.963335	93	2.16	403	2.48	46.89	2.98	55.9	4.177	27.28	40	91	0.363	58.2	2.34	69.2	37	7.19	51.996	-9.50481
Cs	Cr	I	0.0591796	408.761	-38.3138	1.81	0.94	2.06	4.59547	0	0.912168	0.456311	301.59	944	0.79	375.7	2180	2944	1.66	652.87	386.85	457.4	2.66	1008.39	1.87	132.905	-0.852602	0.477812	118.03	-0.854626	67.5	2.35	375.7	2.67	45.49	3.34	71.07	3.894	25.1		100	0.24	35.9	2.092	67.74	55	7.19	51.996	-9.50481
Cs	Cr	Cl	0.0175153	292.369	-45.9845	1.81	0.94	1.67	3.30849	0	0.942809	0.562874	301.59	944	0.79	375.7	2180	2944	1.66	652.87	171.6	239.11	3.16	1251.19	1.87	132.905	-0.852602	0.477812	118.03	-0.854626	67.5	2.35	375.7	2.67	45.49	3.34	71.07	3.894	25.1		100	0.24	35.9	2.092	67.74	55	7.19	51.996	-9.50481
Cs	Cr	Br	0.066703	338.583	-42.241	1.81	0.94	1.82	4.16493	0	0.929999	0.516484	301.59	944	0.79	375.7	2180	2944	1.66	652.87	265.8	332	2.96	1139.86	1.87	132.905	-0.852602	0.477812	118.03	-0.854626	67.5	2.35	375.7	2.67	45.49	3.34	71.07	3.894	25.1		100	0.24	35.9	2.092	67.74	55	7.19	51.996	-9.50481
Cs	Cr	Cl	0.00563718	299.654	-46.1033	1.81	0.94	1.67	3.22806	0.1619	0.942809	0.562874	301.59	944	0.79	375.7	2180	2944	1.66	652.87	171.6	239.11	3.16	1251.19	1.87	132.905	-0.852602	0.477812	118.03	-0.854626	67.5	2.35	375.7	2.67	45.49	3.34	71.07	3.894	25.1		100	0.24	35.9	2.092	67.74	55	7.19	51.996	-9.50481
Cs	Cr	Cl	0.0178343	292.3	-45.9813	1.81	0.94	1.67	3.30926	0	0.942809	0.562874	301.59	944	0.79	375.7	2180	2944	1.66	652.87	171.6	239.11	3.16	1251.19	1.87	132.905	-0.852602	0.477812	118.03	-0.854626	67.5	2.35	375.7	2.67	45.49	3.34	71.07	3.894	25.1		100	0.24	35.9	2.092	67.74	55	7.19	51.996	-9.50481
Cs	Cr	I	0.0565534	823.959	-76.68	1.81	0.94	2.06	4.55958	0	0.912168	0.456311	301.59	944	0.79	375.7	2180	2944	1.66	652.87	386.85	457.4	2.66	1008.39	1.87	132.905	-0.852602	0.477812	118.03	-0.854626	67.5	2.35	375.7	2.67	45.49	3.34	71.07	3.894	25.1		100	0.24	35.9	2.092	67.74	55	7.19	51.996	-9.50481
Cs	Pt	Br	0.254428	950.727	-61.436	1.81	0.94	1.82	3.96619	0	0.929999	0.516484	301.59	944	0.79	375.7	2041.4	4098	2.28	864.4	265.8	332	2.96	1139.86	1.87	132.905	-0.852602	0.477812	118.03	-0.854626	67.5	2.35	375.7	2.67	45.49	3.34	71.07	3.894	25.1		100	0.24	35.9	2.092	67.74	55	21.45	195.08	-5.92514
K	V	Cl	0	263.935	-46.2309	1.52	0.93	1.67	2.47127	0.3413	0.867566	0.556886	336.53	1032	0.82	418.81	2183	3680	1.63	650.91	171.6	239.11	3.16	1251.19	0.86	39.0983	-1.09652	-0.0540791	72.1	-1.09754	75.6	2.03	418.8	2.35	48.36	2.77	45.46	4.341	31.625	45.72	82	0.757	102.5	2.33	76.9	19	6.11	50.9415	-8.93926
Rb	V	Br	0	321.835	-42.2322	1.66	0.93	1.82	3.88127	0.5888	0.894811	0.510989	312.46	961	0.82	403.03	2183	3680	1.63	650.91	265.8	332	2.96	1139.86	1.532	85.4678	-0.961937	0.0908836	88.64	-0.963335	93	2.16	403	2.48	46.89	2.98	55.9	4.177	27.28	40	91	0.363	58.2	2.34	69.2	37	6.11	50.9415	-8.93926
Rb	V	Br	0.00504156	971.568	-126.706	1.66	0.93	1.82	3.85705	0.5946	0.894811	0.510989	312.46	961	0.82	403.03	2183	3680	1.63	650.91	265.8	332	2.96	1139.86	1.532	85.4678	-0.961937	0.0908836	88.64	-0.963335	93	2.16	403	2.48	46.89	2.98	55.9	4.177	27.28	40	91	0.363	58.2	2.34	69.2	37	6.11	50.9415	-8.93926
Rb	V	Cl	0	276.214	-46.2492	1.66	0.93	1.67	2.91894	0.4028	0.905641	0.556886	312.46	961	0.82	403.03	2183	3680	1.63	650.91	171.6	239.11	3.16	1251.19	1.532	85.4678	-0.961937	0.0908836	88.64	-0.963335	93	2.16	403	2.48	46.89	2.98	55.9	4.177	27.28	40	91	0.363	58.2	2.34	69.2	37	6.11	50.9415	-8.93926
Rb	V	Br	0.100687	970.494	-123.676	1.66	0.93	1.82	3.86132	0.6103	0.894811	0.510989	312.46	961	0.82	403.03	2183	3680	1.63	650.91	265.8	332	2.96	1139.86	1.532	85.4678	-0.961937	0.0908836	88.64	-0.963335	93	2.16	403	2.48	46.89	2.98	55.9	4.177	27.28	40	91	0.363	58.2	2.34	69.2	37	6.11	50.9415	-8.93926
Rb	V	I	0.159531	1198.39	-109.902	1.66	0.93	2.06	4.29929	0.6301	0.879745	0.451456	312.46	961	0.82	403.03	2183	3680	1.63	650.91	386.85	457.4	2.66	1008.39	1.532	85.4678	-0.961937	0.0908836	88.64	-0.963335	93	2.16	403	2.48	46.89	2.98	55.9	4.177	27.28	40	91	0.363	58.2	2.34	69.2	37	6.11	50.9415	-8.93926
Cs	V	Br	0	340.358	-42.429	1.81	0.93	1.82	4.13292	0.6867	0.933381	0.510989	301.59	944	0.79	375.7	2183	3680	1.63	650.91	265.8	332	2.96	1139.86	1.87	132.905	-0.852602	0.477812	118.03	-0.854626	67.5	2.35	375.7	2.67	45.49	3.34	71.07	3.894	25.1		100	0.24	35.9	2.092	67.74	55	6.11	50.9415	-8.93926
Cs	V	I	0	414.45	-38.2567	1.81	0.93	2.06	4.52394	0.6412	0.915218	0.451456	301.59	944	0.79	375.7	2183	3680	1.63	650.91	386.85	457.4	2.66	1008.39	1.87	132.905	-0.852602	0.477812	118.03	-0.854626	67.5	2.35	375.7	2.67	45.49	3.34	71.07	3.894	25.1		100	0.24	35.9	2.092	67.74	55	6.11	50.9415	-8.93926
Cs	V	Cl	0	295.037	-46.3922	1.81	0.93	1.67	3.2667	0.4776	0.946435	0.556886	301.59	944	0.79	375.7	2183	3680	1.63	650.91	171.6	239.11	3.16	1251.19	1.87	132.905	-0.852602	0.477812	118.03	-0.854626	67.5	2.35	375.7	2.67	45.49	3.34	71.07	3.894	25.1		100	0.24	35.9	2.092	67.74	55	6.11	50.9415	-8.93926
K	Fe	Br	0.0515321	584.015	-77.0559	1.52	0.92	1.82	3.80612	0.0821	0.861948	0.505495	336.53	1032	0.82	418.81	1811	3134	1.83	762.47	265.8	332	2.96	1139.86	0.86	39.0983	-1.09652	-0.0540791	72.1	-1.09754	75.6	2.03	418.8	2.35	48.36	2.77	45.46	4.341	31.625	45.72	82	0.757	102.5	2.33	76.9	19	7.874	55.847	-8.28548
K	Fe	Cl	0.328304	492.969	-78.7709	1.52	0.92	1.67	2.7123	0.0492	0.870915	0.550898	336.53	1032	0.82	418.81	1811	3134	1.83	762.47	171.6	239.11	3.16	1251.19	0.86	39.0983	-1.09652	-0.0540791	72.1	-1.09754	75.6	2.03	418.8	2.35	48.36	2.77	45.46	4.341	31.625	45.72	82	0.757	102.5	2.33	76.9	19	7.874	55.847	-8.28548
K	Fe	I	0.198689	648.15	-65.7898	1.52	0.92	2.06	4.87447	0.5441	0.849477	0.446602	336.53	1032	0.82	418.81	1811	3134	1.83	762.47	386.85	457.4	2.66	1008.39	0.86	39.0983	-1.09652	-0.0540791	72.1	-1.09754	75.6	2.03	418.8	2.35	48.36	2.77	45.46	4.341	31.625	45.72	82	0.757	102.5	2.33	76.9	19	7.874	55.847	-8.28548
Rb	Fe	Cl	0.195438	247.767	-40.5422	1.66	0.92	1.67	3.31981	0.4083	0.909137	0.550898	312.46	961	0.82	403.03	1811	3134	1.83	762.47	171.6	239.11	3.16	1251.19	1.532	85.4678	-0.961937	0.0908836	88.64	-0.963335	93	2.16	403	2.48	46.89	2.98	55.9	4.177	27.28	40	91	0.363	58.2	2.34	69.2	37	7.874	55.847	-8.28548
Rb	Fe	Cl	0.0706507	124.176	-20.895	1.66	0.92	1.67	3.31199	0	0.909137	0.550898	312.46	961	0.82	403.03	1811	3134	1.83	762.47	171.6	239.11	3.16	1251.19	1.532	85.4678	-0.961937	0.0908836	88.64	-0.963335	93	2.16	403	2.48	46.89	2.98	55.9	4.177	27.28	40	91	0.363	58.2	2.34	69.2	37	7.874	55.847	-8.28548
Cs	Fe	Br	0.226863	309.098	-36.7631	1.81	0.92	1.82	4.60357	0.3844	0.936787	0.505495	301.59	944	0.79	375.7	1811	3134	1.83	762.47	265.8	332	2.96	1139.86	1.87	132.905	-0.852602	0.477812	118.03	-0.854626	67.5	2.35	375.7	2.67	45.49	3.34	71.07	3.894	25.1		100	0.24	35.9	2.092	67.74	55	7.874	55.847	-8.28548
Cs	Fe	Cl	0.256077	284.914	-40.041	1.81	0.92	1.67	3.43992	0	0.950089	0.550898	301.59	944	0.79	375.7	1811	3134	1.83	762.47	171.6	239.11	3.16	1251.19	1.87	132.905	-0.852602	0.477812	118.03	-0.854626	67.5	2.35	375.7	2.67	45.49	3.34	71.07	3.894	25.1		100	0.24	35.9	2.092	67.74	55	7.874	55.847	-8.28548
K	Co	Cl	0.109559	234.19	-37.9861	1.52	0.885	1.67	2.89849	0	0.882846	0.52994	336.53	1032	0.82	418.81	1768	3200	1.88	760.4	171.6	239.11	3.16	1251.19	0.86	39.0983	-1.09652	-0.0540791	72.1	-1.09754	75.6	2.03	418.8	2.35	48.36	2.77	45.46	4.341	31.625	45.72	82	0.757	102.5	2.33	76.9	19	8.9	58.9332	-6.98009
Rb	Co	Br	0.0930404	302.311	-34.036	1.66	0.885	1.82	4.21973	0	0.909697	0.486264	312.46	961	0.82	403.03	1768	3200	1.88	760.4	265.8	332	2.96	1139.86	1.532	85.4678	-0.961937	0.0908836	88.64	-0.963335	93	2.16	403	2.48	46.89	2.98	55.9	4.177	27.28	40	91	0.363	58.2	2.34	69.2	37	8.9	58.9332	-6.98009
Rb	Co	Br	0.118304	918.655	-101.35	1.66	0.885	1.82	4.16588	0	0.909697	0.486264	312.46	961	0.82	403.03	1768	3200	1.88	760.4	265.8	332	2.96	1139.86	1.532	85.4678	-0.961937	0.0908836	88.64	-0.963335	93	2.16	403	2.48	46.89	2.98	55.9	4.177	27.28	40	91	0.363	58.2	2.34	69.2	37	8.9	58.9332	-6.98009
Rb	Co	Br	0.163063	919.67	-100.007	1.66	0.885	1.82	4.16128	0	0.909697	0.486264	312.46	961	0.82	403.03	1768	3200	1.88	760.4	265.8	332	2.96	1139.86	1.532	85.4678	-0.961937	0.0908836	88.64	-0.963335	93	2.16	403	2.48	46.89	2.98	55.9	4.177	27.28	40	91	0.363	58.2	2.34	69.2	37	8.9	58.9332	-6.98009
Rb	Co	Cl	0.00857297	261.649	-38.8238	1.66	0.885	1.67	3.18286	0	0.921591	0.52994	312.46	961	0.82	403.03	1768	3200	1.88	760.4	171.6	239.11	3.16	1251.19	1.532	85.4678	-0.961937	0.0908836	88.64	-0.963335	93	2.16	403	2.48	46.89	2.98	55.9	4.177	27.28	40	91	0.363	58.2	2.34	69.2	37	8.9	58.9332	-6.98009
Rb	Co	Br	0.0316812	902.003	-103.949	1.66	0.885	1.82	4.24279	0	0.909697	0.486264	312.46	961	0.82	403.03	1768	3200	1.88	760.4	265.8	332	2.96	1139.86	1.532	85.4678	-0.961937	0.0908836	88.64	-0.963335	93	2.16	403	2.48	46.89	2.98	55.9	4.177	27.28	40	91	0.363	58.2	2.34	69.2	37	8.9	58.9332	-6.98009
Cs	Co	Cl	0.00596021	277.686	-38.9125	1.81	0.885	1.67	3.5664	0	0.963104	0.52994	301.59	944	0.79	375.7	1768	3200	1.88	760.4	171.6	239.11	3.16	1251.19	1.87	132.905	-0.852602	0.477812	118.03	-0.854626	67.5	2.35	375.7	2.67	45.49	3.34	71.07	3.894	25.1		100	0.24	35.9	2.092	67.74	55	8.9	58.9332	-6.98009
Cu	Ge	I	0.457315	360.906	-24.6764	0.91	0.87	2.06	4.75654	0.1474	0.71676	0.42233	1357.77	3200	1.9	745.48	1211.4	3093	2.01	762.18	386.85	457.4	2.66	1008.39	8.96	63.456	-3.64289	4.37874	11.08	-3.68065	11.8	1.17	745.4	1.278	118.3	1.57	7.1	7.726	20.292	36.83	16.5	0.385	401	13.14	300.5	29	5.32	72.61	-4.27836
Cu	Ge	I	0.254508	168.737	-13.3522	0.91	0.87	2.06	5.08679	0.7433	0.71676	0.42233	1357.77	3200	1.9	745.48	1211.4	3093	2.01	762.18	386.85	457.4	2.66	1008.39	8.96	63.456	-3.64289	4.37874	11.08	-3.68065	11.8	1.17	745.4	1.278	118.3	1.57	7.1	7.726	20.292	36.83	16.5	0.385	401	13.14	300.5	29	5.32	72.61	-4.27836
K	Cu	Cl	0.0139011	114.684	-16.159	1.52	0.87	1.67	3.02621	0	0.888059	0.520958	336.53	1032	0.82	418.81	1357.77	3200	1.9	745.48	171.6	239.11	3.16	1251.19	0.86	39.0983	-1.09652	-0.0540791	72.1	-1.09754	75.6	2.03	418.8	2.35	48.36	2.77	45.46	4.341	31.625	45.72	82	0.757	102.5	2.33	76.9	19	8.96	63.456	-3.64289
K	Ge	Br	0.0252284	175.641	-15.873	1.52	0.87	1.82	3.32268	2.1307	0.877969	0.478022	336.53	1032	0.82	418.81	1211.4	3093	2.01	762.18	265.8	332	2.96	1139.86	0.86	39.0983	-1.09652	-0.0540791	72.1	-1.09754	75.6	2.03	418.8	2.35	48.36	2.77	45.46	4.341	31.625	45.72	82	0.757	102.5	2.33	76.9	19	5.32	72.61	-4.27836
K	Ge	Br	0	370.388	-31.9984	1.52	0.87	1.82	3.15127	2.9211	0.877969	0.478022	336.53	1032	0.82	418.81	1211.4	3093	2.01	762.18	265.8	332	2.96	1139.86	0.86	39.0983	-1.09652	-0.0540791	72.1	-1.09754	75.6	2.03	418.8	2.35	48.36	2.77	45.46	4.341	31.625	45.72	82	0.757	102.5	2.33	76.9	19	5.32	72.61	-4.27836
K	Cu	Cl	0	523.891	-64.9142	1.52	0.87	1.67	2.64985	0.2581	0.888059	0.520958	336.53	1032	0.82	418.81	1357.77	3200	1.9	745.48	171.6	239.11	3.16	1251.19	0.86	39.0983	-1.09652	-0.0540791	72.1	-1.09754	75.6	2.03	418.8	2.35	48.36	2.77	45.46	4.341	31.625	45.72	82	0.757	102.5	2.33	76.9	19	8.96	63.456	-3.64289
K	Ge	Cl	0.0280591	153.001	-17.5953	1.52	0.87	1.67	2.36704	2.5104	0.888059	0.520958	336.53	1032	0.82	418.81	1211.4	3093	2.01	762.18	171.6	239.11	3.16	1251.19	0.86	39.0983	-1.09652	-0.0540791	72.1	-1.09754	75.6	2.03	418.8	2.35	48.36	2.77	45.46	4.341	31.625	45.72	82	0.757	102.5	2.33	76.9	19	5.32	72.61	-4.27836
K	Cu	Cl	0.0420241	672.185	-64.0737	1.52	0.87	1.67	2.06525	0.2416	0.888059	0.520958	336.53	1032	0.82	418.81	1357.77	3200	1.9	745.48	171.6	239.11	3.16	1251.19	0.86	39.0983	-1.09652	-0.0540791	72.1	-1.09754	75.6	2.03	418.8	2.35	48.36	2.77	45.46	4.341	31.625	45.72	82	0.757	102.5	2.33	76.9	19	8.96	63.456	-3.64289
K	Ge	Cl	0	319.681	-35.4712	1.52	0.87	1.67	2.26575	2.9285	0.888059	0.520958	336.53	1032	0.82	418.81	1211.4	3093	2.01	762.18	171.6	239.11	3.16	1251.19	0.86	39.0983	-1.09652	-0.0540791	72.1	-1.09754	75.6	2.03	418.8	2.35	48.36	2.77	45.46	4.341	31.625	45.72	82	0.757	102.5	2.33	76.9	19	5.32	72.61	-4.27836
Rb	Ge	Cl	0.007491	652.692	-70.9065	1.66	0.87	1.67	2.69136	2.5696	0.927034	0.520958	312.46	961	0.82	403.03	1211.4	3093	2.01	762.18	171.6	239.11	3.16	1251.19	1.532	85.4678	-0.961937	0.0908836	88.64	-0.963335	93	2.16	403	2.48	46.89	2.98	55.9	4.177	27.28	40	91	0.363	58.2	2.34	69.2	37	5.32	72.61	-4.27836
Rb	Ge	I	0.00432368	823.34	-56.7599	1.66	0.87	2.06	4.34685	2.1998	0.89776	0.42233	312.46	961	0.82	403.03	1211.4	3093	2.01	762.18	386.85	457.4	2.66	1008.39	1.532	85.4678	-0.961937	0.0908836	88.64	-0.963335	93	2.16	403	2.48	46.89	2.98	55.9	4.177	27.28	40	91	0.363	58.2	2.34	69.2	37	5.32	72.61	-4.27836
Rb	Cu	Cl	0.0484873	257.945	-31.9138	1.66	0.87	1.67	3.28796	0	0.927034	0.520958	312.46	961	0.82	403.03	1357.77	3200	1.9	745.48	171.6	239.11	3.16	1251.19	1.532	85.4678	-0.961937	0.0908836	88.64	-0.963335	93	2.16	403	2.48	46.89	2.98	55.9	4.177	27.28	40	91	0.363	58.2	2.34	69.2	37	8.96	63.456	-3.64289
Rb	Cu	Cl	0.018237	548.071	-64.4326	1.66	0.87	1.67	3.0949	0.1859	0.927034	0.520958	312.46	961	0.82	403.03	1357.77	3200	1.9	745.48	171.6	239.11	3.16	1251.19	1.532	85.4678	-0.961937	0.0908836	88.64	-0.963335	93	2.16	403	2.48	46.89	2.98	55.9	4.177	27.28	40	91	0.363	58.2	2.34	69.2	37	8.96	63.456	-3.64289
Rb	Cu	Cl	0.0359923	536.586	-64.0775	1.66	0.87	1.67	3.16114	0	0.927034	0.520958	312.46	961	0.82	403.03	1357.77	3200	1.9	745.48	171.6	239.11	3.16	1251.19	1.532	85.4678	-0.961937	0.0908836	88.64	-0.963335	93	2.16	403	2.48	46.89	2.98	55.9	4.177	27.28	40	91	0.363	58.2	2.34	69.2	37	8.96	63.456	-3.64289
Rb	Cu	Br	0.00949015	139.521	-14.3897	1.66	0.87	1.82	4.62651	0	0.91477	0.478022	312.46	961	0.82	403.03	1357.77	3200	1.9	745.48	265.8	332	2.96	1139.86	1.532	85.4678	-0.961937	0.0908836	88.64	-0.963335	93	2.16	403	2.48	46.89	2.98	55.9	4.177	27.28	40	91	0.363	58.2	2.34	69.2	37	8.96	63.456	-3.64289
Rb	Ge	Cl	0	339.236	-35.5281	1.66	0.87	1.67	2.5891	3.8813	0.927034	0.520958	312.46	961	0.82	403.03	1211.4	3093	2.01	762.18	171.6	239.11	3.16	1251.19	1.532	85.4678	-0.961937	0.0908836	88.64	-0.963335	93	2.16	403	2.48	46.89	2.98	55.9	4.177	27.28	40	91	0.363	58.2	2.34	69.2	37	5.32	72.61	-4.27836
Rb	Ge	Br	0	742.785	-63.9857	1.66	0.87	1.82	3.5574	1.9851	0.91477	0.478022	312.46	961	0.82	403.03	1211.4	3093	2.01	762.18	265.8	332	2.96	1139.86	1.532	85.4678	-0.961937	0.0908836	88.64	-0.963335	93	2.16	403	2.48	46.89	2.98	55.9	4.177	27.28	40	91	0.363	58.2	2.34	69.2	37	5.32	72.61	-4.27836
Rb	Ge	I	0.0449642	211.314	-13.9868	1.66	0.87	2.06	4.23415	2.4471	0.89776	0.42233	312.46	961	0.82	403.03	1211.4	3093	2.01	762.18	386.85	457.4	2.66	1008.39	1.532	85.4678	-0.961937	0.0908836	88.64	-0.963335	93	2.16	403	2.48	46.89	2.98	55.9	4.177	27.28	40	91	0.363	58.2	2.34	69.2	37	5.32	72.61	-4.27836
Rb	Ge	Br	0.00697188	400.054	-31.9231	1.66	0.87	1.82	3.30253	3.1453	0.91477	0.478022	312.46	961	0.82	403.03	1211.4	3093	2.01	762.18	265.8	332	2.96	1139.86	1.532	85.4678	-0.961937	0.0908836	88.64	-0.963335	93	2.16	403	2.48	46.89	2.98	55.9	4.177	27.28	40	91	0.363	58.2	2.34	69.2	37	5.32	72.61	-4.27836
Rb	Cu	Cl	0	256.399	-32.3987	1.66	0.87	1.67	3.30779	0.0479	0.927034	0.520958	312.46	961	0.82	403.03	1357.77	3200	1.9	745.48	171.6	239.11	3.16	1251.19	1.532	85.4678	-0.961937	0.0908836	88.64	-0.963335	93	2.16	403	2.48	46.89	2.98	55.9	4.177	27.28	40	91	0.363	58.2	2.34	69.2	37	8.96	63.456	-3.64289
Rb	Cu	Cl	0.035176	538.999	-64.0938	1.66	0.87	1.67	3.14699	0	0.927034	0.520958	312.46	961	0.82	403.03	1357.77	3200	1.9	745.48	171.6	239.11	3.16	1251.19	1.532	85.4678	-0.961937	0.0908836	88.64	-0.963335	93	2.16	403	2.48	46.89	2.98	55.9	4.177	27.28	40	91	0.363	58.2	2.34	69.2	37	8.96	63.456	-3.64289
Cs	Ge	I	0	226.644	-14.2488	1.81	0.87	2.06	4.29531	2.1992	0.93396	0.42233	301.59	944	0.79	375.7	1211.4	3093	2.01	762.18	386.85	457.4	2.66	1008.39	1.87	132.905	-0.852602	0.477812	118.03	-0.854626	67.5	2.35	375.7	2.67	45.49	3.34	71.07	3.894	25.1		100	0.24	35.9	2.092	67.74	55	5.32	72.61	-4.27836
Cs	Ge	Br	0	185.491	-16.0734	1.81	0.87	1.82	3.98601	2.2258	0.9542	0.478022	301.59	944	0.79	375.7	1211.4	3093	2.01	762.18	265.8	332	2.96	1139.86	1.87	132.905	-0.852602	0.477812	118.03	-0.854626	67.5	2.35	375.7	2.67	45.49	3.34	71.07	3.894	25.1		100	0.24	35.9	2.092	67.74	55	5.32	72.61	-4.27836
Cs	Ge	Br	0.0125132	176.822	-16.0109	1.81	0.87	1.82	4.18141	2.1234	0.9542	0.478022	301.59	944	0.79	375.7	1211.4	3093	2.01	762.18	265.8	332	2.96	1139.86	1.87	132.905	-0.852602	0.477812	118.03	-0.854626	67.5	2.35	375.7	2.67	45.49	3.34	71.07	3.894	25.1		100	0.24	35.9	2.092	67.74	55	5.32	72.61	-4.27836
Cs	Cu	Cl	0	872.059	-96.8695	1.81	0.87	1.67	3.45959	0.5514	0.968792	0.520958	301.59	944	0.79	375.7	1357.77	3200	1.9	745.48	171.6	239.11	3.16	1251.19	1.87	132.905	-0.852602	0.477812	118.03	-0.854626	67.5	2.35	375.7	2.67	45.49	3.34	71.07	3.894	25.1		100	0.24	35.9	2.092	67.74	55	8.96	63.456	-3.64289
Cs	Ge	I	0.00611795	234.166	-14.2182	1.81	0.87	2.06	4.15733	2.1808	0.93396	0.42233	301.59	944	0.79	375.7	1211.4	3093	2.01	762.18	386.85	457.4	2.66	1008.39	1.87	132.905	-0.852602	0.477812	118.03	-0.854626	67.5	2.35	375.7	2.67	45.49	3.34	71.07	3.894	25.1		100	0.24	35.9	2.092	67.74	55	5.32	72.61	-4.27836
Cs	Ge	Br	0.000632148	191.742	-16.0703	1.81	0.87	1.82	3.85606	2.2936	0.9542	0.478022	301.59	944	0.79	375.7	1211.4	3093	2.01	762.18	265.8	332	2.96	1139.86	1.87	132.905	-0.852602	0.477812	118.03	-0.854626	67.5	2.35	375.7	2.67	45.49	3.34	71.07	3.894	25.1		100	0.24	35.9	2.092	67.74	55	5.32	72.61	-4.27836
Cs	Cu	Cl	0.0491989	278.104	-31.7978	1.81	0.87	1.67	3.61611	0	0.968792	0.520958	301.59	944	0.79	375.7	1357.77	3200	1.9	745.48	171.6	239.11	3.16	1251.19	1.87	132.905	-0.852602	0.477812	118.03	-0.854626	67.5	2.35	375.7	2.67	45.49	3.34	71.07	3.894	25.1		100	0.24	35.9	2.092	67.74	55	8.96	63.456	-3.64289
Cs	Cu	Cl	0.0325211	279.175	-31.9646	1.81	0.87	1.67	3.60224	0	0.968792	0.520958	301.59	944	0.79	375.7	1357.77	3200	1.9	745.48	171.6	239.11	3.16	1251.19	1.87	132.905	-0.852602	0.477812	118.03	-0.854626	67.5	2.35	375.7	2.67	45.49	3.34	71.07	3.894	25.1		100	0.24	35.9	2.092	67.74	55	8.96	63.456	-3.64289
Cs	Ge	Cl	0	168.037	-17.7856	1.81	0.87	1.67	3.08224	2.848	0.968792	0.520958	301.59	944	0.79	375.7	1211.4	3093	2.01	762.18	171.6	239.11	3.16	1251.19	1.87	132.905	-0.852602	0.477812	118.03	-0.854626	67.5	2.35	375.7	2.67	45.49	3.34	71.07	3.894	25.1		100	0.24	35.9	2.092	67.74	55	5.32	72.61	-4.27836
Cs	Cu	Br	0	665.264	-58.2533	1.81	0.87	1.82	4.35476	0.3765	0.9542	0.478022	301.59	944	0.79	375.7	1357.77	3200	1.9	745.48	265.8	332	2.96	1139.86	1.87	132.905	-0.852602	0.477812	118.03	-0.854626	67.5	2.35	375.7	2.67	45.49	3.34	71.07	3.894	25.1		100	0.24	35.9	2.092	67.74	55	8.96	63.456	-3.64289
K	Mg	Cl	0.0027526	498.961	-70.8713	1.52	0.86	1.67	2.25987	4.9792	0.891569	0.51497	336.53	1032	0.82	418.81	923	1363	1.31	737.75	171.6	239.11	3.16	1251.19	0.86	39.0983	-1.09652	-0.0540791	72.1	-1.09754	75.6	2.03	418.8	2.35	48.36	2.77	45.46	4.341	31.625	45.72	82	0.757	102.5	2.33	76.9	19	1.74	24.305	-1.51367
Rb	Mg	Cl	0	539.808	-70.8016	1.66	0.86	1.67	2.65943	4.7517	0.930698	0.51497	312.46	961	0.82	403.03	923	1363	1.31	737.75	171.6	239.11	3.16	1251.19	1.532	85.4678	-0.961937	0.0908836	88.64	-0.963335	93	2.16	403	2.48	46.89	2.98	55.9	4.177	27.28	40	91	0.363	58.2	2.34	69.2	37	1.74	24.305	-1.51367
Rb	Mg	Cl	0.00424205	795.018	-106.075	1.66	0.86	1.67	2.70858	4.6099	0.930698	0.51497	312.46	961	0.82	403.03	923	1363	1.31	737.75	171.6	239.11	3.16	1251.19	1.532	85.4678	-0.961937	0.0908836	88.64	-0.963335	93	2.16	403	2.48	46.89	2.98	55.9	4.177	27.28	40	91	0.363	58.2	2.34	69.2	37	1.74	24.305	-1.51367
Cs	Mg	Br	0	350.718	-31.4268	1.81	0.86	1.82	3.7586	4.0464	0.95776	0.472527	301.59	944	0.79	375.7	923	1363	1.31	737.75	265.8	332	2.96	1139.86	1.87	132.905	-0.852602	0.477812	118.03	-0.854626	67.5	2.35	375.7	2.67	45.49	3.34	71.07	3.894	25.1		100	0.24	35.9	2.092	67.74	55	1.74	24.305	-1.51367
Cs	Mg	I	0	432.772	-26.8324	1.81	0.86	2.06	4.12801	3.1807	0.937159	0.417476	301.59	944	0.79	375.7	923	1363	1.31	737.75	386.85	457.4	2.66	1008.39	1.87	132.905	-0.852602	0.477812	118.03	-0.854626	67.5	2.35	375.7	2.67	45.49	3.34	71.07	3.894	25.1		100	0.24	35.9	2.092	67.74	55	1.74	24.305	-1.51367
Cs	Mg	Cl	0	298.388	-35.621	1.81	0.86	1.67	2.93354	5.1283	0.972621	0.51497	301.59	944	0.79	375.7	923	1363	1.31	737.75	171.6	239.11	3.16	1251.19	1.87	132.905	-0.852602	0.477812	118.03	-0.854626	67.5	2.35	375.7	2.67	45.49	3.34	71.07	3.894	25.1		100	0.24	35.9	2.092	67.74	55	1.74	24.305	-1.51367
K	Ni	Cl	0	732.911	-109.479	1.52	0.83	1.67	2.77524	0.6991	0.902268	0.497006	336.53	1032	0.82	418.81	1728	3186	1.91	737.14	171.6	239.11	3.16	1251.19	0.86	39.0983	-1.09652	-0.0540791	72.1	-1.09754	75.6	2.03	418.8	2.35	48.36	2.77	45.46	4.341	31.625	45.72	82	0.757	102.5	2.33	76.9	19	8.9	58.6934	-5.43914
Rb	Ni	Br	0	301.256	-32.7983	1.66	0.83	1.82	4.23186	0.4675	0.928578	0.456044	312.46	961	0.82	403.03	1728	3186	1.91	737.14	265.8	332	2.96	1139.86	1.532	85.4678	-0.961937	0.0908836	88.64	-0.963335	93	2.16	403	2.48	46.89	2.98	55.9	4.177	27.28	40	91	0.363	58.2	2.34	69.2	37	8.9	58.6934	-5.43914
Rb	Ni	Cl	0	256.283	-36.4433	1.66	0.83	1.67	3.2464	0.7182	0.941866	0.497006	312.46	961	0.82	403.03	1728	3186	1.91	737.14	171.6	239.11	3.16	1251.19	1.532	85.4678	-0.961937	0.0908836	88.64	-0.963335	93	2.16	403	2.48	46.89	2.98	55.9	4.177	27.28	40	91	0.363	58.2	2.34	69.2	37	8.9	58.6934	-5.43914
Cs	Ni	Br	0.0993743	325.005	-31.6945	1.81	0.83	1.82	4.40736	0	0.968603	0.456044	301.59	944	0.79	375.7	1728	3186	1.91	737.14	265.8	332	2.96	1139.86	1.87	132.905	-0.852602	0.477812	118.03	-0.854626	67.5	2.35	375.7	2.67	45.49	3.34	71.07	3.894	25.1		100	0.24	35.9	2.092	67.74	55	8.9	58.6934	-5.43914
Cs	Ni	Cl	0	276.428	-36.5359	1.81	0.83	1.67	3.57975	0.8174	0.984293	0.497006	301.59	944	0.79	375.7	1728	3186	1.91	737.14	171.6	239.11	3.16	1251.19	1.87	132.905	-0.852602	0.477812	118.03	-0.854626	67.5	2.35	375.7	2.67	45.49	3.34	71.07	3.894	25.1		100	0.24	35.9	2.092	67.74	55	8.9	58.6934	-5.43914
[truncated: 42 more columns]

## Sheet: A2B1B2X6
A	B1	B2	X	melting_A	boiling_A	electronegativity_A	ionization_A	melting_B1	boiling_B1	electronegativity_B1	ionization_B1	melting_B2	boiling_B2	electronegativity_B2	ionization_B2	Density_A	at.wt._A	BCCenergy_pa_A	BCCfermi_A	BCCvolume_pa_A	GSenergy_pa_A	ICSDVolume_A	covalentradius_A	IonizationEnergy_A	AtomicRadius_A	ElectronAffinity_A	At.Radius(angstroms)_A	AtomicVolume_A	FirstIonizationPotential_A	SecondIonizationPotential_A	ThirdIonizationPotential_A	CoeficientofThermalExpansion_A	specificheatcapacity_A	thermalconductivity_A	heatoffusion_A	HeatofVaporization_A	At. # _A	Density_B1	at.wt._B1	b'CCenergy_pa_B1'	BCCfermi_B1	BCCvolume_pa_B1	GSenergy_pa_B1	ICSDVolume_B1	covalentradius_B1	IonizationEnergy_B1	AtomicRadius_B1	ElectronAffinity_B1	At.Radius(angstroms)_B1
Na	Cu	Lu	Cl	370.87	1156	0.93	495.85	1357.77	3200	1.9	745.48	1925	3675	1.27	523.52	0.97	22.9898	-1.25448	1.31525	29.21	-1.26024	39.7	1.54	495.8	1.9	52.7	2.23	23.7	5.139	47.286	71.641	71	1.23	141	2.601	98.01	11	8.96	63.456	-3.64289	4.37874	11.08	-3.68065	11.8	1.17	745.4	1.278	118.3	1.57
Na	Ag	Ga	Cl	370.87	1156	0.93	495.85	1234.93	2435	1.93	731	302.91	2477	1.81	578.84	0.97	22.9898	-1.25448	1.31525	29.21	-1.26024	39.7	1.54	495.8	1.9	52.7	2.23	23.7	5.139	47.286	71.641	71	1.23	141	2.601	98.01	11	10.5	107.868	-2.71998	4.05276	16.2	-2.76539	17	1.34	731	1.444	125.7	1.75
Na	Ag	Lu	Cl	370.87	1156	0.93	495.85	1234.93	2435	1.93	731	1925	3675	1.27	523.52	0.97	22.9898	-1.25448	1.31525	29.21	-1.26024	39.7	1.54	495.8	1.9	52.7	2.23	23.7	5.139	47.286	71.641	71	1.23	141	2.601	98.01	11	10.5	107.868	-2.71998	4.05276	16.2	-2.76539	17	1.34	731	1.444	125.7	1.75
K	Ag	Lu	Cl	336.53	1032	0.82	418.81	1234.93	2435	1.93	731	1925	3675	1.27	523.52	0.86	39.0983	-1.09652	-0.0540791	72.1	-1.09754	75.6	2.03	418.8	2.35	48.36	2.77	45.46	4.341	31.625	45.72	82	0.757	102.5	2.33	76.9	19	10.5	107.868	-2.71998	4.05276	16.2	-2.76539	17	1.34	731	1.444	125.7	1.75
K	Ag	Y	I	336.53	1032	0.82	418.81	1234.93	2435	1.93	731	1799	3609	1.22	599.87	0.86	39.0983	-1.09652	-0.0540791	72.1	-1.09754	75.6	2.03	418.8	2.35	48.36	2.77	45.46	4.341	31.625	45.72	82	0.757	102.5	2.33	76.9	19	10.5	107.868	-2.71998	4.05276	16.2	-2.76539	17	1.34	731	1.444	125.7	1.75
Rb	Cu	Y	I	312.46	961	0.82	403.03	1357.77	3200	1.9	745.48	1799	3609	1.22	599.87	1.532	85.4678	-0.961937	0.0908836	88.64	-0.963335	93	2.16	403	2.48	46.89	2.98	55.9	4.177	27.28	40	91	0.363	58.2	2.34	69.2	37	8.96	63.456	-3.64289	4.37874	11.08	-3.68065	11.8	1.17	745.4	1.278	118.3	1.57
K	Ag	Er	Cl	336.53	1032	0.82	418.81	1234.93	2435	1.93	731	1802	3141	1.24	589.3	0.86	39.0983	-1.09652	-0.0540791	72.1	-1.09754	75.6	2.03	418.8	2.35	48.36	2.77	45.46	4.341	31.625	45.72	82	0.757	102.5	2.33	76.9	19	10.5	107.868	-2.71998	4.05276	16.2	-2.76539	17	1.34	731	1.444	125.7	1.75
Na	Cu	Y	Cl	370.87	1156	0.93	495.85	1357.77	3200	1.9	745.48	1799	3609	1.22	599.87	0.97	22.9898	-1.25448	1.31525	29.21	-1.26024	39.7	1.54	495.8	1.9	52.7	2.23	23.7	5.139	47.286	71.641	71	1.23	141	2.601	98.01	11	8.96	63.456	-3.64289	4.37874	11.08	-3.68065	11.8	1.17	745.4	1.278	118.3	1.57
Rb	Ag	In	Br	312.46	961	0.82	403.03	1234.93	2435	1.93	731	429.75	2345	1.78	558.3	1.532	85.4678	-0.961937	0.0908836	88.64	-0.963335	93	2.16	403	2.48	46.89	2.98	55.9	4.177	27.28	40	91	0.363	58.2	2.34	69.2	37	10.5	107.868	-2.71998	4.05276	16.2	-2.76539	17	1.34	731	1.444	125.7	1.75
Na	Cu	In	Br	370.87	1156	0.93	495.85	1357.77	3200	1.9	745.48	429.75	2345	1.78	558.3	0.97	22.9898	-1.25448	1.31525	29.21	-1.26024	39.7	1.54	495.8	1.9	52.7	2.23	23.7	5.139	47.286	71.641	71	1.23	141	2.601	98.01	11	8.96	63.456	-3.64289	4.37874	11.08	-3.68065	11.8	1.17	745.4	1.278	118.3	1.57
Na	Ag	Al	Cl	370.87	1156	0.93	495.85	1234.93	2435	1.93	731	933.47	2792	1.61	577.54	0.97	22.9898	-1.25448	1.31525	29.21	-1.26024	39.7	1.54	495.8	1.9	52.7	2.23	23.7	5.139	47.286	71.641	71	1.23	141	2.601	98.01	11	10.5	107.868	-2.71998	4.05276	16.2	-2.76539	17	1.34	731	1.444	125.7	1.75
K	Ag	Al	Cl	336.53	1032	0.82	418.81	1234.93	2435	1.93	731	933.47	2792	1.61	577.54	0.86	39.0983	-1.09652	-0.0540791	72.1	-1.09754	75.6	2.03	418.8	2.35	48.36	2.77	45.46	4.341	31.625	45.72	82	0.757	102.5	2.33	76.9	19	10.5	107.868	-2.71998	4.05276	16.2	-2.76539	17	1.34	731	1.444	125.7	1.75
K	Ag	In	Cl	336.53	1032	0.82	418.81	1234.93	2435	1.93	731	429.75	2345	1.78	558.3	0.86	39.0983	-1.09652	-0.0540791	72.1	-1.09754	75.6	2.03	418.8	2.35	48.36	2.77	45.46	4.341	31.625	45.72	82	0.757	102.5	2.33	76.9	19	10.5	107.868	-2.71998	4.05276	16.2	-2.76539	17	1.34	731	1.444	125.7	1.75
K	Cu	Pr	Br	336.53	1032	0.82	418.81	1357.77	3200	1.9	745.48	1208	3563	1.13	527.79	0.86	39.0983	-1.09652	-0.0540791	72.1	-1.09754	75.6	2.03	418.8	2.35	48.36	2.77	45.46	4.341	31.625	45.72	82	0.757	102.5	2.33	76.9	19	8.96	63.456	-3.64289	4.37874	11.08	-3.68065	11.8	1.17	745.4	1.278	118.3	1.57
K	Ag	Y	Cl	336.53	1032	0.82	418.81	1234.93	2435	1.93	731	1799	3609	1.22	599.87	0.86	39.0983	-1.09652	-0.0540791	72.1	-1.09754	75.6	2.03	418.8	2.35	48.36	2.77	45.46	4.341	31.625	45.72	82	0.757	102.5	2.33	76.9	19	10.5	107.868	-2.71998	4.05276	16.2	-2.76539	17	1.34	731	1.444	125.7	1.75
K	Ag	Pr	Br	336.53	1032	0.82	418.81	1234.93	2435	1.93	731	1208	3563	1.13	527.79	0.86	39.0983	-1.09652	-0.0540791	72.1	-1.09754	75.6	2.03	418.8	2.35	48.36	2.77	45.46	4.341	31.625	45.72	82	0.757	102.5	2.33	76.9	19	10.5	107.868	-2.71998	4.05276	16.2	-2.76539	17	1.34	731	1.444	125.7	1.75
K	Cu	In	Br	336.53	1032	0.82	418.81	1357.77	3200	1.9	745.48	429.75	2345	1.78	558.3	0.86	39.0983	-1.09652	-0.0540791	72.1	-1.09754	75.6	2.03	418.8	2.35	48.36	2.77	45.46	4.341	31.625	45.72	82	0.757	102.5	2.33	76.9	19	8.96	63.456	-3.64289	4.37874	11.08	-3.68065	11.8	1.17	745.4	1.278	118.3	1.57
K	Ag	Ga	Cl	336.53	1032	0.82	418.81	1234.93	2435	1.93	731	302.91	2477	1.81	578.84	0.86	39.0983	-1.09652	-0.0540791	72.1	-1.09754	75.6	2.03	418.8	2.35	48.36	2.77	45.46	4.341	31.625	45.72	82	0.757	102.5	2.33	76.9	19	10.5	107.868	-2.71998	4.05276	16.2	-2.76539	17	1.34	731	1.444	125.7	1.75
K	Ag	Ga	Br	336.53	1032	0.82	418.81	1234.93	2435	1.93	731	302.91	2477	1.81	578.84	0.86	39.0983	-1.09652	-0.0540791	72.1	-1.09754	75.6	2.03	418.8	2.35	48.36	2.77	45.46	4.341	31.625	45.72	82	0.757	102.5	2.33	76.9	19	10.5	107.868	-2.71998	4.05276	16.2	-2.76539	17	1.34	731	1.444	125.7	1.75
Rb	Ag	Sc	Br	312.46	961	0.82	403.03	1234.93	2435	1.93	731	1814	3103	1.36	633.09	1.532	85.4678	-0.961937	0.0908836	88.64	-0.963335	93	2.16	403	2.48	46.89	2.98	55.9	4.177	27.28	40	91	0.363	58.2	2.34	69.2	37	10.5	107.868	-2.71998	4.05276	16.2	-2.76539	17	1.34	731	1.444	125.7	1.75
Rb	Ag	Pr	Br	312.46	961	0.82	403.03	1234.93	2435	1.93	731	1208	3563	1.13	527.79	1.532	85.4678	-0.961937	0.0908836	88.64	-0.963335	93	2.16	403	2.48	46.89	2.98	55.9	4.177	27.28	40	91	0.363	58.2	2.34	69.2	37	10.5	107.868	-2.71998	4.05276	16.2	-2.76539	17	1.34	731	1.444	125.7	1.75
Rb	Ag	In	I	312.46	961	0.82	403.03	1234.93	2435	1.93	731	429.75	2345	1.78	558.3	1.532	85.4678	-0.961937	0.0908836	88.64	-0.963335	93	2.16	403	2.48	46.89	2.98	55.9	4.177	27.28	40	91	0.363	58.2	2.34	69.2	37	10.5	107.868	-2.71998	4.05276	16.2	-2.76539	17	1.34	731	1.444	125.7	1.75
Rb	Ag	Lu	Cl	312.46	961	0.82	403.03	1234.93	2435	1.93	731	1925	3675	1.27	523.52	1.532	85.4678	-0.961937	0.0908836	88.64	-0.963335	93	2.16	403	2.48	46.89	2.98	55.9	4.177	27.28	40	91	0.363	58.2	2.34	69.2	37	10.5	107.868	-2.71998	4.05276	16.2	-2.76539	17	1.34	731	1.444	125.7	1.75
Na	Ag	Al	Br	370.87	1156	0.93	495.85	1234.93	2435	1.93	731	933.47	2792	1.61	577.54	0.97	22.9898	-1.25448	1.31525	29.21	-1.26024	39.7	1.54	495.8	1.9	52.7	2.23	23.7	5.139	47.286	71.641	71	1.23	141	2.601	98.01	11	10.5	107.868	-2.71998	4.05276	16.2	-2.76539	17	1.34	731	1.444	125.7	1.75
K	Cu	Pr	I	336.53	1032	0.82	418.81	1357.77	3200	1.9	745.48	1208	3563	1.13	527.79	0.86	39.0983	-1.09652	-0.0540791	72.1	-1.09754	75.6	2.03	418.8	2.35	48.36	2.77	45.46	4.341	31.625	45.72	82	0.757	102.5	2.33	76.9	19	8.96	63.456	-3.64289	4.37874	11.08	-3.68065	11.8	1.17	745.4	1.278	118.3	1.57
K	Ag	Pr	I	336.53	1032	0.82	418.81	1234.93	2435	1.93	731	1208	3563	1.13	527.79	0.86	39.0983	-1.09652	-0.0540791	72.1	-1.09754	75.6	2.03	418.8	2.35	48.36	2.77	45.46	4.341	31.625	45.72	82	0.757	102.5	2.33	76.9	19	10.5	107.868	-2.71998	4.05276	16.2	-2.76539	17	1.34	731	1.444	125.7	1.75
K	Ag	Pr	Cl	336.53	1032	0.82	418.81	1234.93	2435	1.93	731	1208	3563	1.13	527.79	0.86	39.0983	-1.09652	-0.0540791	72.1	-1.09754	75.6	2.03	418.8	2.35	48.36	2.77	45.46	4.341	31.625	45.72	82	0.757	102.5	2.33	76.9	19	10.5	107.868	-2.71998	4.05276	16.2	-2.76539	17	1.34	731	1.444	125.7	1.75
K	Cu	Y	Cl	336.53	1032	0.82	418.81	1357.77	3200	1.9	745.48	1799	3609	1.22	599.87	0.86	39.0983	-1.09652	-0.0540791	72.1	-1.09754	75.6	2.03	418.8	2.35	48.36	2.77	45.46	4.341	31.625	45.72	82	0.757	102.5	2.33	76.9	19	8.96	63.456	-3.64289	4.37874	11.08	-3.68065	11.8	1.17	745.4	1.278	118.3	1.57
K	Cu	Gd	Cl	336.53	1032	0.82	418.81	1357.77	3200	1.9	745.48	1585	3523	1.2	593.37	0.86	39.0983	-1.09652	-0.0540791	72.1	-1.09754	75.6	2.03	418.8	2.35	48.36	2.77	45.46	4.341	31.625	45.72	82	0.757	102.5	2.33	76.9	19	8.96	63.456	-3.64289	4.37874	11.08	-3.68065	11.8	1.17	745.4	1.278	118.3	1.57
K	Cu	Y	I	336.53	1032	0.82	418.81	1357.77	3200	1.9	745.48	1799	3609	1.22	599.87	0.86	39.0983	-1.09652	-0.0540791	72.1	-1.09754	75.6	2.03	418.8	2.35	48.36	2.77	45.46	4.341	31.625	45.72	82	0.757	102.5	2.33	76.9	19	8.96	63.456	-3.64289	4.37874	11.08	-3.68065	11.8	1.17	745.4	1.278	118.3	1.57
K	Ag	Ga	I	336.53	1032	0.82	418.81	1234.93	2435	1.93	731	302.91	2477	1.81	578.84	0.86	39.0983	-1.09652	-0.0540791	72.1	-1.09754	75.6	2.03	418.8	2.35	48.36	2.77	45.46	4.341	31.625	45.72	82	0.757	102.5	2.33	76.9	19	10.5	107.868	-2.71998	4.05276	16.2	-2.76539	17	1.34	731	1.444	125.7	1.75
Rb	Cu	La	Cl	312.46	961	0.82	403.03	1357.77	3200	1.9	745.48	1193	3743	1.1	538.09	1.532	85.4678	-0.961937	0.0908836	88.64	-0.963335	93	2.16	403	2.48	46.89	2.98	55.9	4.177	27.28	40	91	0.363	58.2	2.34	69.2	37	8.96	63.456	-3.64289	4.37874	11.08	-3.68065	11.8	1.17	745.4	1.278	118.3	1.57
Na	Cu	Y	Br	370.87	1156	0.93	495.85	1357.77	3200	1.9	745.48	1799	3609	1.22	599.87	0.97	22.9898	-1.25448	1.31525	29.21	-1.26024	39.7	1.54	495.8	1.9	52.7	2.23	23.7	5.139	47.286	71.641	71	1.23	141	2.601	98.01	11	8.96	63.456	-3.64289	4.37874	11.08	-3.68065	11.8	1.17	745.4	1.278	118.3	1.57
Rb	Cu	Pr	Br	312.46	961	0.82	403.03	1357.77	3200	1.9	745.48	1208	3563	1.13	527.79	1.532	85.4678	-0.961937	0.0908836	88.64	-0.963335	93	2.16	403	2.48	46.89	2.98	55.9	4.177	27.28	40	91	0.363	58.2	2.34	69.2	37	8.96	63.456	-3.64289	4.37874	11.08	-3.68065	11.8	1.17	745.4	1.278	118.3	1.57
Rb	Ag	Pr	Cl	312.46	961	0.82	403.03	1234.93	2435	1.93	731	1208	3563	1.13	527.79	1.532	85.4678	-0.961937	0.0908836	88.64	-0.963335	93	2.16	403	2.48	46.89	2.98	55.9	4.177	27.28	40	91	0.363	58.2	2.34	69.2	37	10.5	107.868	-2.71998	4.05276	16.2	-2.76539	17	1.34	731	1.444	125.7	1.75
Rb	Ag	La	Cl	312.46	961	0.82	403.03	1234.93	2435	1.93	731	1193	3743	1.1	538.09	1.532	85.4678	-0.961937	0.0908836	88.64	-0.963335	93	2.16	403	2.48	46.89	2.98	55.9	4.177	27.28	40	91	0.363	58.2	2.34	69.2	37	10.5	107.868	-2.71998	4.05276	16.2	-2.76539	17	1.34	731	1.444	125.7	1.75
K	Ag	Y	Br	336.53	1032	0.82	418.81	1234.93	2435	1.93	731	1799	3609	1.22	599.87	0.86	39.0983	-1.09652	-0.0540791	72.1	-1.09754	75.6	2.03	418.8	2.35	48.36	2.77	45.46	4.341	31.625	45.72	82	0.757	102.5	2.33	76.9	19	10.5	107.868	-2.71998	4.05276	16.2	-2.76539	17	1.34	731	1.444	125.7	1.75
K	Ag	Ce	Br	336.53	1032	0.82	418.81	1234.93	2435	1.93	731	1068	3633	1.12	534.39	0.86	39.0983	-1.09652	-0.0540791	72.1	-1.09754	75.6	2.03	418.8	2.35	48.36	2.77	45.46	4.341	31.625	45.72	82	0.757	102.5	2.33	76.9	19	10.5	107.868	-2.71998	4.05276	16.2	-2.76539	17	1.34	731	1.444	125.7	1.75
K	Cu	Pr	Cl	336.53	1032	0.82	418.81	1357.77	3200	1.9	745.48	1208	3563	1.13	527.79	0.86	39.0983	-1.09652	-0.0540791	72.1	-1.09754	75.6	2.03	418.8	2.35	48.36	2.77	45.46	4.341	31.625	45.72	82	0.757	102.5	2.33	76.9	19	8.96	63.456	-3.64289	4.37874	11.08	-3.68065	11.8	1.17	745.4	1.278	118.3	1.57
Rb	Ag	Sc	Cl	312.46	961	0.82	403.03	1234.93	2435	1.93	731	1814	3103	1.36	633.09	1.532	85.4678	-0.961937	0.0908836	88.64	-0.963335	93	2.16	403	2.48	46.89	2.98	55.9	4.177	27.28	40	91	0.363	58.2	2.34	69.2	37	10.5	107.868	-2.71998	4.05276	16.2	-2.76539	17	1.34	731	1.444	125.7	1.75
Rb	Ag	Y	Br	312.46	961	0.82	403.03	1234.93	2435	1.93	731	1799	3609	1.22	599.87	1.532	85.4678	-0.961937	0.0908836	88.64	-0.963335	93	2.16	403	2.48	46.89	2.98	55.9	4.177	27.28	40	91	0.363	58.2	2.34	69.2	37	10.5	107.868	-2.71998	4.05276	16.2	-2.76539	17	1.34	731	1.444	125.7	1.75
Rb	Cu	Lu	Cl	312.46	961	0.82	403.03	1357.77	3200	1.9	745.48	1925	3675	1.27	523.52	1.532	85.4678	-0.961937	0.0908836	88.64	-0.963335	93	2.16	403	2.48	46.89	2.98	55.9	4.177	27.28	40	91	0.363	58.2	2.34	69.2	37	8.96	63.456	-3.64289	4.37874	11.08	-3.68065	11.8	1.17	745.4	1.278	118.3	1.57
Rb	Ag	Gd	Cl	312.46	961	0.82	403.03	1234.93	2435	1.93	731	1585	3523	1.2	593.37	1.532	85.4678	-0.961937	0.0908836	88.64	-0.963335	93	2.16	403	2.48	46.89	2.98	55.9	4.177	27.28	40	91	0.363	58.2	2.34	69.2	37	10.5	107.868	-2.71998	4.05276	16.2	-2.76539	17	1.34	731	1.444	125.7	1.75
Na	Ag	In	Cl	370.87	1156	0.93	495.85	1234.93	2435	1.93	731	429.75	2345	1.78	558.3	0.97	22.9898	-1.25448	1.31525	29.21	-1.26024	39.7	1.54	495.8	1.9	52.7	2.23	23.7	5.139	47.286	71.641	71	1.23	141	2.601	98.01	11	10.5	107.868	-2.71998	4.05276	16.2	-2.76539	17	1.34	731	1.444	125.7	1.75
K	Ag	Ce	Cl	336.53	1032	0.82	418.81	1234.93	2435	1.93	731	1068	3633	1.12	534.39	0.86	39.0983	-1.09652	-0.0540791	72.1	-1.09754	75.6	2.03	418.8	2.35	48.36	2.77	45.46	4.341	31.625	45.72	82	0.757	102.5	2.33	76.9	19	10.5	107.868	-2.71998	4.05276	16.2	-2.76539	17	1.34	731	1.444	125.7	1.75
K	Ag	Al	Br	336.53	1032	0.82	418.81	1234.93	2435	1.93	731	933.47	2792	1.61	577.54	0.86	39.0983	-1.09652	-0.0540791	72.1	-1.09754	75.6	2.03	418.8	2.35	48.36	2.77	45.46	4.341	31.625	45.72	82	0.757	102.5	2.33	76.9	19	10.5	107.868	-2.71998	4.05276	16.2	-2.76539	17	1.34	731	1.444	125.7	1.75
K	Cu	Lu	Cl	336.53	1032	0.82	418.81	1357.77	3200	1.9	745.48	1925	3675	1.27	523.52	0.86	39.0983	-1.09652	-0.0540791	72.1	-1.09754	75.6	2.03	418.8	2.35	48.36	2.77	45.46	4.341	31.625	45.72	82	0.757	102.5	2.33	76.9	19	8.96	63.456	-3.64289	4.37874	11.08	-3.68065	11.8	1.17	745.4	1.278	118.3	1.57
K	Cu	La	Cl	336.53	1032	0.82	418.81	1357.77	3200	1.9	745.48	1193	3743	1.1	538.09	0.86	39.0983	-1.09652	-0.0540791	72.1	-1.09754	75.6	2.03	418.8	2.35	48.36	2.77	45.46	4.341	31.625	45.72	82	0.757	102.5	2.33	76.9	19	8.96	63.456	-3.64289	4.37874	11.08	-3.68065	11.8	1.17	745.4	1.278	118.3	1.57
Rb	Cu	Pr	I	312.46	961	0.82	403.03	1357.77	3200	1.9	745.48	1208	3563	1.13	527.79	1.532	85.4678	-0.961937	0.0908836	88.64	-0.963335	93	2.16	403	2.48	46.89	2.98	55.9	4.177	27.28	40	91	0.363	58.2	2.34	69.2	37	8.96	63.456	-3.64289	4.37874	11.08	-3.68065	11.8	1.17	745.4	1.278	118.3	1.57
K	Ag	In	Br	336.53	1032	0.82	418.81	1234.93	2435	1.93	731	429.75	2345	1.78	558.3	0.86	39.0983	-1.09652	-0.0540791	72.1	-1.09754	75.6	2.03	418.8	2.35	48.36	2.77	45.46	4.341	31.625	45.72	82	0.757	102.5	2.33	76.9	19	10.5	107.868	-2.71998	4.05276	16.2	-2.76539	17	1.34	731	1.444	125.7	1.75
Rb	Cu	Ce	Cl	312.46	961	0.82	403.03	1357.77	3200	1.9	745.48	1068	3633	1.12	534.39	1.532	85.4678	-0.961937	0.0908836	88.64	-0.963335	93	2.16	403	2.48	46.89	2.98	55.9	4.177	27.28	40	91	0.363	58.2	2.34	69.2	37	8.96	63.456	-3.64289	4.37874	11.08	-3.68065	11.8	1.17	745.4	1.278	118.3	1.57
Na	Cu	Sc	Cl	370.87	1156	0.93	495.85	1357.77	3200	1.9	745.48	1814	3103	1.36	633.09	0.97	22.9898	-1.25448	1.31525	29.21	-1.26024	39.7	1.54	495.8	1.9	52.7	2.23	23.7	5.139	47.286	71.641	71	1.23	141	2.601	98.01	11	8.96	63.456	-3.64289	4.37874	11.08	-3.68065	11.8	1.17	745.4	1.278	118.3	1.57
Rb	Cu	Sc	Cl	312.46	961	0.82	403.03	1357.77	3200	1.9	745.48	1814	3103	1.36	633.09	1.532	85.4678	-0.961937	0.0908836	88.64	-0.963335	93	2.16	403	2.48	46.89	2.98	55.9	4.177	27.28	40	91	0.363	58.2	2.34	69.2	37	8.96	63.456	-3.64289	4.37874	11.08	-3.68065	11.8	1.17	745.4	1.278	118.3	1.57
Rb	Ag	Y	I	312.46	961	0.82	403.03	1234.93	2435	1.93	731	1799	3609	1.22	599.87	1.532	85.4678	-0.961937	0.0908836	88.64	-0.963335	93	2.16	403	2.48	46.89	2.98	55.9	4.177	27.28	40	91	0.363	58.2	2.34	69.2	37	10.5	107.868	-2.71998	4.05276	16.2	-2.76539	17	1.34	731	1.444	125.7	1.75
Rb	Ag	Pr	I	312.46	961	0.82	403.03	1234.93	2435	1.93	731	1208	3563	1.13	527.79	1.532	85.4678	-0.961937	0.0908836	88.64	-0.963335	93	2.16	403	2.48	46.89	2.98	55.9	4.177	27.28	40	91	0.363	58.2	2.34	69.2	37	10.5	107.868	-2.71998	4.05276	16.2	-2.76539	17	1.34	731	1.444	125.7	1.75
Rb	Ag	Ce	Cl	312.46	961	0.82	403.03	1234.93	2435	1.93	731	1068	3633	1.12	534.39	1.532	85.4678	-0.961937	0.0908836	88.64	-0.963335	93	2.16	403	2.48	46.89	2.98	55.9	4.177	27.28	40	91	0.363	58.2	2.34	69.2	37	10.5	107.868	-2.71998	4.05276	16.2	-2.76539	17	1.34	731	1.444	125.7	1.75
Rb	Ag	Ce	I	312.46	961	0.82	403.03	1234.93	2435	1.93	731	1068	3633	1.12	534.39	1.532	85.4678	-0.961937	0.0908836	88.64	-0.963335	93	2.16	403	2.48	46.89	2.98	55.9	4.177	27.28	40	91	0.363	58.2	2.34	69.2	37	10.5	107.868	-2.71998	4.05276	16.2	-2.76539	17	1.34	731	1.444	125.7	1.75
K	Cu	In	Cl	336.53	1032	0.82	418.81	1357.77	3200	1.9	745.48	429.75	2345	1.78	558.3	0.86	39.0983	-1.09652	-0.0540791	72.1	-1.09754	75.6	2.03	418.8	2.35	48.36	2.77	45.46	4.341	31.625	45.72	82	0.757	102.5	2.33	76.9	19	8.96	63.456	-3.64289	4.37874	11.08	-3.68065	11.8	1.17	745.4	1.278	118.3	1.57
Na	Cu	La	Cl	370.87	1156	0.93	495.85	1357.77	3200	1.9	745.48	1193	3743	1.1	538.09	0.97	22.9898	-1.25448	1.31525	29.21	-1.26024	39.7	1.54	495.8	1.9	52.7	2.23	23.7	5.139	47.286	71.641	71	1.23	141	2.601	98.01	11	8.96	63.456	-3.64289	4.37874	11.08	-3.68065	11.8	1.17	745.4	1.278	118.3	1.57
Li	Cu	In	Cl	453.69	1615	0.98	520.22	1357.77	3200	1.9	745.48	429.75	2345	1.78	558.3	0.53	6.941	-1.86553	0.227209	16.51	-1.86989	21.6	1.23	520	1.55	59.8	2.05	13.1	5.392	76.638	122.451	46	3.582	84.7	3	147.1	3	8.96	63.456	-3.64289	4.37874	11.08	-3.68065	11.8	1.17	745.4	1.278	118.3	1.57
K	Ag	Sc	Br	336.53	1032	0.82	418.81	1234.93	2435	1.93	731	1814	3103	1.36	633.09	0.86	39.0983	-1.09652	-0.0540791	72.1	-1.09754	75.6	2.03	418.8	2.35	48.36	2.77	45.46	4.341	31.625	45.72	82	0.757	102.5	2.33	76.9	19	10.5	107.868	-2.71998	4.05276	16.2	-2.76539	17	1.34	731	1.444	125.7	1.75
K	Cu	Ce	I	336.53	1032	0.82	418.81	1357.77	3200	1.9	745.48	1068	3633	1.12	534.39	0.86	39.0983	-1.09652	-0.0540791	72.1	-1.09754	75.6	2.03	418.8	2.35	48.36	2.77	45.46	4.341	31.625	45.72	82	0.757	102.5	2.33	76.9	19	8.96	63.456	-3.64289	4.37874	11.08	-3.68065	11.8	1.17	745.4	1.278	118.3	1.57
K	Ag	Ce	I	336.53	1032	0.82	418.81	1234.93	2435	1.93	731	1068	3633	1.12	534.39	0.86	39.0983	-1.09652	-0.0540791	72.1	-1.09754	75.6	2.03	418.8	2.35	48.36	2.77	45.46	4.341	31.625	45.72	82	0.757	102.5	2.33	76.9	19	10.5	107.868	-2.71998	4.05276	16.2	-2.76539	17	1.34	731	1.444	125.7	1.75
K	Cu	Sc	Cl	336.53	1032	0.82	418.81	1357.77	3200	1.9	745.48	1814	3103	1.36	633.09	0.86	39.0983	-1.09652	-0.0540791	72.1	-1.09754	75.6	2.03	418.8	2.35	48.36	2.77	45.46	4.341	31.625	45.72	82	0.757	102.5	2.33	76.9	19	8.96	63.456	-3.64289	4.37874	11.08	-3.68065	11.8	1.17	745.4	1.278	118.3	1.57
K	Ag	Sc	Cl	336.53	1032	0.82	418.81	1234.93	2435	1.93	731	1814	3103	1.36	633.09	0.86	39.0983	-1.09652	-0.0540791	72.1	-1.09754	75.6	2.03	418.8	2.35	48.36	2.77	45.46	4.341	31.625	45.72	82	0.757	102.5	2.33	76.9	19	10.5	107.868	-2.71998	4.05276	16.2	-2.76539	17	1.34	731	1.444	125.7	1.75
Rb	Cu	Er	Cl	312.46	961	0.82	403.03	1357.77	3200	1.9	745.48	1802	3141	1.24	589.3	1.532	85.4678	-0.961937	0.0908836	88.64	-0.963335	93	2.16	403	2.48	46.89	2.98	55.9	4.177	27.28	40	91	0.363	58.2	2.34	69.2	37	8.96	63.456	-3.64289	4.37874	11.08	-3.68065	11.8	1.17	745.4	1.278	118.3	1.57
Rb	Cu	Pr	Cl	312.46	961	0.82	403.03	1357.77	3200	1.9	745.48	1208	3563	1.13	527.79	1.532	85.4678	-0.961937	0.0908836	88.64	-0.963335	93	2.16	403	2.48	46.89	2.98	55.9	4.177	27.28	40	91	0.363	58.2	2.34	69.2	37	8.96	63.456	-3.64289	4.37874	11.08	-3.68065	11.8	1.17	745.4	1.278	118.3	1.57
Rb	Cu	In	Cl	312.46	961	0.82	403.03	1357.77	3200	1.9	745.48	429.75	2345	1.78	558.3	1.532	85.4678	-0.961937	0.0908836	88.64	-0.963335	93	2.16	403	2.48	46.89	2.98	55.9	4.177	27.28	40	91	0.363	58.2	2.34	69.2	37	8.96	63.456	-3.64289	4.37874	11.08	-3.68065	11.8	1.17	745.4	1.278	118.3	1.57
Rb	Ag	Sc	I	312.46	961	0.82	403.03	1234.93	2435	1.93	731	1814	3103	1.36	633.09	1.532	85.4678	-0.961937	0.0908836	88.64	-0.963335	93	2.16	403	2.48	46.89	2.98	55.9	4.177	27.28	40	91	0.363	58.2	2.34	69.2	37	10.5	107.868	-2.71998	4.05276	16.2	-2.76539	17	1.34	731	1.444	125.7	1.75
Rb	Ag	Er	Cl	312.46	961	0.82	403.03	1234.93	2435	1.93	731	1802	3141	1.24	589.3	1.532	85.4678	-0.961937	0.0908836	88.64	-0.963335	93	2.16	403	2.48	46.89	2.98	55.9	4.177	27.28	40	91	0.363	58.2	2.34	69.2	37	10.5	107.868	-2.71998	4.05276	16.2	-2.76539	17	1.34	731	1.444	125.7	1.75
Rb	Ag	Al	Br	312.46	961	0.82	403.03	1234.93	2435	1.93	731	933.47	2792	1.61	577.54	1.532	85.4678	-0.961937	0.0908836	88.64	-0.963335	93	2.16	403	2.48	46.89	2.98	55.9	4.177	27.28	40	91	0.363	58.2	2.34	69.2	37	10.5	107.868	-2.71998	4.05276	16.2	-2.76539	17	1.34	731	1.444	125.7	1.75
Rb	Ag	Ce	Br	312.46	961	0.82	403.03	1234.93	2435	1.93	731	1068	3633	1.12	534.39	1.532	85.4678	-0.961937	0.0908836	88.64	-0.963335	93	2.16	403	2.48	46.89	2.98	55.9	4.177	27.28	40	91	0.363	58.2	2.34	69.2	37	10.5	107.868	-2.71998	4.05276	16.2	-2.76539	17	1.34	731	1.444	125.7	1.75
Rb	Ag	Al	Cl	312.46	961	0.82	403.03	1234.93	2435	1.93	731	933.47	2792	1.61	577.54	1.532	85.4678	-0.961937	0.0908836	88.64	-0.963335	93	2.16	403	2.48	46.89	2.98	55.9	4.177	27.28	40	91	0.363	58.2	2.34	69.2	37	10.5	107.868	-2.71998	4.05276	16.2	-2.76539	17	1.34	731	1.444	125.7	1.75
Na	Cu	In	Cl	370.87	1156	0.93	495.85	1357.77	3200	1.9	745.48	429.75	2345	1.78	558.3	0.97	22.9898	-1.25448	1.31525	29.21	-1.26024	39.7	1.54	495.8	1.9	52.7	2.23	23.7	5.139	47.286	71.641	71	1.23	141	2.601	98.01	11	8.96	63.456	-3.64289	4.37874	11.08	-3.68065	11.8	1.17	745.4	1.278	118.3	1.57
Na	Ag	In	Br	370.87	1156	0.93	495.85	1234.93	2435	1.93	731	429.75	2345	1.78	558.3	0.97	22.9898	-1.25448	1.31525	29.21	-1.26024	39.7	1.54	495.8	1.9	52.7	2.23	23.7	5.139	47.286	71.641	71	1.23	141	2.601	98.01	11	10.5	107.868	-2.71998	4.05276	16.2	-2.76539	17	1.34	731	1.444	125.7	1.75
Na	Cu	Er	Cl	370.87	1156	0.93	495.85	1357.77	3200	1.9	745.48	1802	3141	1.24	589.3	0.97	22.9898	-1.25448	1.31525	29.21	-1.26024	39.7	1.54	495.8	1.9	52.7	2.23	23.7	5.139	47.286	71.641	71	1.23	141	2.601	98.01	11	8.96	63.456	-3.64289	4.37874	11.08	-3.68065	11.8	1.17	745.4	1.278	118.3	1.57
Na	Cu	Ce	Cl	370.87	1156	0.93	495.85	1357.77	3200	1.9	745.48	1068	3633	1.12	534.39	0.97	22.9898	-1.25448	1.31525	29.21	-1.26024	39.7	1.54	495.8	1.9	52.7	2.23	23.7	5.139	47.286	71.641	71	1.23	141	2.601	98.01	11	8.96	63.456	-3.64289	4.37874	11.08	-3.68065	11.8	1.17	745.4	1.278	118.3	1.57
K	Cu	Y	Br	336.53	1032	0.82	418.81	1357.77	3200	1.9	745.48	1799	3609	1.22	599.87	0.86	39.0983	-1.09652	-0.0540791	72.1	-1.09754	75.6	2.03	418.8	2.35	48.36	2.77	45.46	4.341	31.625	45.72	82	0.757	102.5	2.33	76.9	19	8.96	63.456	-3.64289	4.37874	11.08	-3.68065	11.8	1.17	745.4	1.278	118.3	1.57
K	Ag	In	I	336.53	1032	0.82	418.81	1234.93	2435	1.93	731	429.75	2345	1.78	558.3	0.86	39.0983	-1.09652	-0.0540791	72.1	-1.09754	75.6	2.03	418.8	2.35	48.36	2.77	45.46	4.341	31.625	45.72	82	0.757	102.5	2.33	76.9	19	10.5	107.868	-2.71998	4.05276	16.2	-2.76539	17	1.34	731	1.444	125.7	1.75
K	Cu	Er	Cl	336.53	1032	0.82	418.81	1357.77	3200	1.9	745.48	1802	3141	1.24	589.3	0.86	39.0983	-1.09652	-0.0540791	72.1	-1.09754	75.6	2.03	418.8	2.35	48.36	2.77	45.46	4.341	31.625	45.72	82	0.757	102.5	2.33	76.9	19	8.96	63.456	-3.64289	4.37874	11.08	-3.68065	11.8	1.17	745.4	1.278	118.3	1.57
Rb	Cu	Y	Br	312.46	961	0.82	403.03	1357.77	3200	1.9	745.48	1799	3609	1.22	599.87	1.532	85.4678	-0.961937	0.0908836	88.64	-0.963335	93	2.16	403	2.48	46.89	2.98	55.9	4.177	27.28	40	91	0.363	58.2	2.34	69.2	37	8.96	63.456	-3.64289	4.37874	11.08	-3.68065	11.8	1.17	745.4	1.278	118.3	1.57
K	Cu	Ce	Br	336.53	1032	0.82	418.81	1357.77	3200	1.9	745.48	1068	3633	1.12	534.39	0.86	39.0983	-1.09652	-0.0540791	72.1	-1.09754	75.6	2.03	418.8	2.35	48.36	2.77	45.46	4.341	31.625	45.72	82	0.757	102.5	2.33	76.9	19	8.96	63.456	-3.64289	4.37874	11.08	-3.68065	11.8	1.17	745.4	1.278	118.3	1.57
Na	Cu	Pr	Cl	370.87	1156	0.93	495.85	1357.77	3200	1.9	745.48	1208	3563	1.13	527.79	0.97	22.9898	-1.25448	1.31525	29.21	-1.26024	39.7	1.54	495.8	1.9	52.7	2.23	23.7	5.139	47.286	71.641	71	1.23	141	2.601	98.01	11	8.96	63.456	-3.64289	4.37874	11.08	-3.68065	11.8	1.17	745.4	1.278	118.3	1.57
Rb	Cu	Ce	Br	312.46	961	0.82	403.03	1357.77	3200	1.9	745.48	1068	3633	1.12	534.39	1.532	85.4678	-0.961937	0.0908836	88.64	-0.963335	93	2.16	403	2.48	46.89	2.98	55.9	4.177	27.28	40	91	0.363	58.2	2.34	69.2	37	8.96	63.456	-3.64289	4.37874	11.08	-3.68065	11.8	1.17	745.4	1.278	118.3	1.57
Rb	Ag	Ga	Cl	312.46	961	0.82	403.03	1234.93	2435	1.93	731	302.91	2477	1.81	578.84	1.532	85.4678	-0.961937	0.0908836	88.64	-0.963335	93	2.16	403	2.48	46.89	2.98	55.9	4.177	27.28	40	91	0.363	58.2	2.34	69.2	37	10.5	107.868	-2.71998	4.05276	16.2	-2.76539	17	1.34	731	1.444	125.7	1.75
Na	Ag	Ga	I	370.87	1156	0.93	495.85	1234.93	2435	1.93	731	302.91	2477	1.81	578.84	0.97	22.9898	-1.25448	1.31525	29.21	-1.26024	39.7	1.54	495.8	1.9	52.7	2.23	23.7	5.139	47.286	71.641	71	1.23	141	2.601	98.01	11	10.5	107.868	-2.71998	4.05276	16.2	-2.76539	17	1.34	731	1.444	125.7	1.75
Li	Cu	Sc	Cl	453.69	1615	0.98	520.22	1357.77	3200	1.9	745.48	1814	3103	1.36	633.09	0.53	6.941	-1.86553	0.227209	16.51	-1.86989	21.6	1.23	520	1.55	59.8	2.05	13.1	5.392	76.638	122.451	46	3.582	84.7	3	147.1	3	8.96	63.456	-3.64289	4.37874	11.08	-3.68065	11.8	1.17	745.4	1.278	118.3	1.57
Na	Ag	Sc	Cl	370.87	1156	0.93	495.85	1234.93	2435	1.93	731	1814	3103	1.36	633.09	0.97	22.9898	-1.25448	1.31525	29.21	-1.26024	39.7	1.54	495.8	1.9	52.7	2.23	23.7	5.139	47.286	71.641	71	1.23	141	2.601	98.01	11	10.5	107.868	-2.71998	4.05276	16.2	-2.76539	17	1.34	731	1.444	125.7	1.75
Na	Ag	Ga	Br	370.87	1156	0.93	495.85	1234.93	2435	1.93	731	302.91	2477	1.81	578.84	0.97	22.9898	-1.25448	1.31525	29.21	-1.26024	39.7	1.54	495.8	1.9	52.7	2.23	23.7	5.139	47.286	71.641	71	1.23	141	2.601	98.01	11	10.5	107.868	-2.71998	4.05276	16.2	-2.76539	17	1.34	731	1.444	125.7	1.75
K	Ag	Sc	I	336.53	1032	0.82	418.81	1234.93	2435	1.93	731	1814	3103	1.36	633.09	0.86	39.0983	-1.09652	-0.0540791	72.1	-1.09754	75.6	2.03	418.8	2.35	48.36	2.77	45.46	4.341	31.625	45.72	82	0.757	102.5	2.33	76.9	19	10.5	107.868	-2.71998	4.05276	16.2	-2.76539	17	1.34	731	1.444	125.7	1.75
K	Cu	Ce	Cl	336.53	1032	0.82	418.81	1357.77	3200	1.9	745.48	1068	3633	1.12	534.39	0.86	39.0983	-1.09652	-0.0540791	72.1	-1.09754	75.6	2.03	418.8	2.35	48.36	2.77	45.46	4.341	31.625	45.72	82	0.757	102.5	2.33	76.9	19	8.96	63.456	-3.64289	4.37874	11.08	-3.68065	11.8	1.17	745.4	1.278	118.3	1.57
K	Ag	La	Cl	336.53	1032	0.82	418.81	1234.93	2435	1.93	731	1193	3743	1.1	538.09	0.86	39.0983	-1.09652	-0.0540791	72.1	-1.09754	75.6	2.03	418.8	2.35	48.36	2.77	45.46	4.341	31.625	45.72	82	0.757	102.5	2.33	76.9	19	10.5	107.868	-2.71998	4.05276	16.2	-2.76539	17	1.34	731	1.444	125.7	1.75
Rb	Cu	In	Br	312.46	961	0.82	403.03	1357.77	3200	1.9	745.48	429.75	2345	1.78	558.3	1.532	85.4678	-0.961937	0.0908836	88.64	-0.963335	93	2.16	403	2.48	46.89	2.98	55.9	4.177	27.28	40	91	0.363	58.2	2.34	69.2	37	8.96	63.456	-3.64289	4.37874	11.08	-3.68065	11.8	1.17	745.4	1.278	118.3	1.57
Rb	Cu	Y	Cl	312.46	961	0.82	403.03	1357.77	3200	1.9	745.48	1799	3609	1.22	599.87	1.532	85.4678	-0.961937	0.0908836	88.64	-0.963335	93	2.16	403	2.48	46.89	2.98	55.9	4.177	27.28	40	91	0.363	58.2	2.34	69.2	37	8.96	63.456	-3.64289	4.37874	11.08	-3.68065	11.8	1.17	745.4	1.278	118.3	1.57
Rb	Ag	Y	Cl	312.46	961	0.82	403.03	1234.93	2435	1.93	731	1799	3609	1.22	599.87	1.532	85.4678	-0.961937	0.0908836	88.64	-0.963335	93	2.16	403	2.48	46.89	2.98	55.9	4.177	27.28	40	91	0.363	58.2	2.34	69.2	37	10.5	107.868	-2.71998	4.05276	16.2	-2.76539	17	1.34	731	1.444	125.7	1.75
Rb	Ag	Ga	I	312.46	961	0.82	403.03	1234.93	2435	1.93	731	302.91	2477	1.81	578.84	1.532	85.4678	-0.961937	0.0908836	88.64	-0.963335	93	2.16	403	2.48	46.89	2.98	55.9	4.177	27.28	40	91	0.363	58.2	2.34	69.2	37	10.5	107.868	-2.71998	4.05276	16.2	-2.76539	17	1.34	731	1.444	125.7	1.75
Rb	Ag	In	Cl	312.46	961	0.82	403.03	1234.93	2435	1.93	731	429.75	2345	1.78	558.3	1.532	85.4678	-0.961937	0.0908836	88.64	-0.963335	93	2.16	403	2.48	46.89	2.98	55.9	4.177	27.28	40	91	0.363	58.2	2.34	69.2	37	10.5	107.868	-2.71998	4.05276	16.2	-2.76539	17	1.34	731	1.444	125.7	1.75
Rb	Ag	Ga	Br	312.46	961	0.82	403.03	1234.93	2435	1.93	731	302.91	2477	1.81	578.84	1.532	85.4678	-0.961937	0.0908836	88.64	-0.963335	93	2.16	403	2.48	46.89	2.98	55.9	4.177	27.28	40	91	0.363	58.2	2.34	69.2	37	10.5	107.868	-2.71998	4.05276	16.2	-2.76539	17	1.34	731	1.444	125.7	1.75
K	Rb	Sc	Cl	336.53	1032	0.82	418.81	312.46	961	0.82	403.03	1814	3103	1.36	633.09	0.86	39.0983	-1.09652	-0.0540791	72.1	-1.09754	75.6	2.03	418.8	2.35	48.36	2.77	45.46	4.341	31.625	45.72	82	0.757	102.5	2.33	76.9	19	1.532	85.4678	-0.961937	0.0908836	88.64	-0.963335	93	2.16	403	2.48	46.89	2.98
K	Rb	In	Br	336.53	1032	0.82	418.81	312.46	961	0.82	403.03	429.75	2345	1.78	558.3	0.86	39.0983	-1.09652	-0.0540791	72.1	-1.09754	75.6	2.03	418.8	2.35	48.36	2.77	45.46	4.341	31.625	45.72	82	0.757	102.5	2.33	76.9	19	1.532	85.4678	-0.961937	0.0908836	88.64	-0.963335	93	2.16	403	2.48	46.89	2.98
K	Rb	Dy	Cl	336.53	1032	0.82	418.81	312.46	961	0.82	403.03	1680	2840	1.22	573.03	0.86	39.0983	-1.09652	-0.0540791	72.1	-1.09754	75.6	2.03	418.8	2.35	48.36	2.77	45.46	4.341	31.625	45.72	82	0.757	102.5	2.33	76.9	19	1.532	85.4678	-0.961937	0.0908836	88.64	-0.963335	93	2.16	403	2.48	46.89	2.98
K	Na	Y	Br	336.53	1032	0.82	418.81	370.87	1156	0.93	495.85	1799	3609	1.22	599.87	0.86	39.0983	-1.09652	-0.0540791	72.1	-1.09754	75.6	2.03	418.8	2.35	48.36	2.77	45.46	4.341	31.625	45.72	82	0.757	102.5	2.33	76.9	19	0.97	22.9898	-1.25448	1.31525	29.21	-1.26024	39.7	1.54	495.8	1.9	52.7	2.23
K	Li	Sm	Cl	336.53	1032	0.82	418.81	453.69	1615	0.98	520.22	1345	2076	1.17	544.54	0.86	39.0983	-1.09652	-0.0540791	72.1	-1.09754	75.6	2.03	418.8	2.35	48.36	2.77	45.46	4.341	31.625	45.72	82	0.757	102.5	2.33	76.9	19	0.53	6.941	-1.86553	0.227209	16.51	-1.86989	21.6	1.23	520	1.55	59.8	2.05
K	Li	Eu	Cl	336.53	1032	0.82	418.81	453.69	1615	0.98	520.22	1099	1800	1.19	547.11	0.86	39.0983	-1.09652	-0.0540791	72.1	-1.09754	75.6	2.03	418.8	2.35	48.36	2.77	45.46	4.341	31.625	45.72	82	0.757	102.5	2.33	76.9	19	0.53	6.941	-1.86553	0.227209	16.51	-1.86989	21.6	1.23	520	1.55	59.8	2.05
Na	Cu	Bi	Cl	370.87	1156	0.93	495.85	1357.77	3200	1.9	745.48	544.4	1837	2.02	702.95	0.97	22.9898	-1.25448	1.31525	29.21	-1.26024	39.7	1.54	495.8	1.9	52.7	2.23	23.7	5.139	47.286	71.641	71	1.23	141	2.601	98.01	11	8.96	63.456	-3.64289	4.37874	11.08	-3.68065	11.8	1.17	745.4	1.278	118.3	1.57
K	Na	Tm	Cl	336.53	1032	0.82	418.81	370.87	1156	0.93	495.85	1818	2223	1.25	596.7	0.86	39.0983	-1.09652	-0.0540791	72.1	-1.09754	75.6	2.03	418.8	2.35	48.36	2.77	45.46	4.341	31.625	45.72	82	0.757	102.5	2.33	76.9	19	0.97	22.9898	-1.25448	1.31525	29.21	-1.26024	39.7	1.54	495.8	1.9	52.7	2.23
K	Na	Mo	Br	336.53	1032	0.82	418.81	370.87	1156	0.93	495.85	2896	4912	2.16	684.32	0.86	39.0983	-1.09652	-0.0540791	72.1	-1.09754	75.6	2.03	418.8	2.35	48.36	2.77	45.46	4.341	31.625	45.72	82	0.757	102.5	2.33	76.9	19	0.97	22.9898	-1.25448	1.31525	29.21	-1.26024	39.7	1.54	495.8	1.9	52.7	2.23
K	Na	Lu	Cl	336.53	1032	0.82	418.81	370.87	1156	0.93	495.85	1925	3675	1.27	523.52	0.86	39.0983	-1.09652	-0.0540791	72.1	-1.09754	75.6	2.03	418.8	2.35	48.36	2.77	45.46	4.341	31.625	45.72	82	0.757	102.5	2.33	76.9	19	0.97	22.9898	-1.25448	1.31525	29.21	-1.26024	39.7	1.54	495.8	1.9	52.7	2.23
K	Li	Gd	Cl	336.53	1032	0.82	418.81	453.69	1615	0.98	520.22	1585	3523	1.2	593.37	0.86	39.0983	-1.09652	-0.0540791	72.1	-1.09754	75.6	2.03	418.8	2.35	48.36	2.77	45.46	4.341	31.625	45.72	82	0.757	102.5	2.33	76.9	19	0.53	6.941	-1.86553	0.227209	16.51	-1.86989	21.6	1.23	520	1.55	59.8	2.05
K	Cu	Sb	I	336.53	1032	0.82	418.81	1357.77	3200	1.9	745.48	903.78	1860	2.05	830.58	0.86	39.0983	-1.09652	-0.0540791	72.1	-1.09754	75.6	2.03	418.8	2.35	48.36	2.77	45.46	4.341	31.625	45.72	82	0.757	102.5	2.33	76.9	19	8.96	63.456	-3.64289	4.37874	11.08	-3.68065	11.8	1.17	745.4	1.278	118.3	1.57
K	Cu	Mo	Br	336.53	1032	0.82	418.81	1357.77	3200	1.9	745.48	2896	4912	2.16	684.32	0.86	39.0983	-1.09652	-0.0540791	72.1	-1.09754	75.6	2.03	418.8	2.35	48.36	2.77	45.46	4.341	31.625	45.72	82	0.757	102.5	2.33	76.9	19	8.96	63.456	-3.64289	4.37874	11.08	-3.68065	11.8	1.17	745.4	1.278	118.3	1.57
K	Cu	Bi	Br	336.53	1032	0.82	418.81	1357.77	3200	1.9	745.48	544.4	1837	2.02	702.95	0.86	39.0983	-1.09652	-0.0540791	72.1	-1.09754	75.6	2.03	418.8	2.35	48.36	2.77	45.46	4.341	31.625	45.72	82	0.757	102.5	2.33	76.9	19	8.96	63.456	-3.64289	4.37874	11.08	-3.68065	11.8	1.17	745.4	1.278	118.3	1.57
Rb	Cu	Sb	I	312.46	961	0.82	403.03	1357.77	3200	1.9	745.48	903.78	1860	2.05	830.58	1.532	85.4678	-0.961937	0.0908836	88.64	-0.963335	93	2.16	403	2.48	46.89	2.98	55.9	4.177	27.28	40	91	0.363	58.2	2.34	69.2	37	8.96	63.456	-3.64289	4.37874	11.08	-3.68065	11.8	1.17	745.4	1.278	118.3	1.57
Rb	Ag	Mo	Cl	312.46	961	0.82	403.03	1234.93	2435	1.93	731	2896	4912	2.16	684.32	1.532	85.4678	-0.961937	0.0908836	88.64	-0.963335	93	2.16	403	2.48	46.89	2.98	55.9	4.177	27.28	40	91	0.363	58.2	2.34	69.2	37	10.5	107.868	-2.71998	4.05276	16.2	-2.76539	17	1.34	731	1.444	125.7	1.75
Rb	Ag	Mo	Br	312.46	961	0.82	403.03	1234.93	2435	1.93	731	2896	4912	2.16	684.32	1.532	85.4678	-0.961937	0.0908836	88.64	-0.963335	93	2.16	403	2.48	46.89	2.98	55.9	4.177	27.28	40	91	0.363	58.2	2.34	69.2	37	10.5	107.868	-2.71998	4.05276	16.2	-2.76539	17	1.34	731	1.444	125.7	1.75
Na	Li	Sm	Cl	370.87	1156	0.93	495.85	453.69	1615	0.98	520.22	1345	2076	1.17	544.54	0.97	22.9898	-1.25448	1.31525	29.21	-1.26024	39.7	1.54	495.8	1.9	52.7	2.23	23.7	5.139	47.286	71.641	71	1.23	141	2.601	98.01	11	0.53	6.941	-1.86553	0.227209	16.51	-1.86989	21.6	1.23	520	1.55	59.8	2.05
Na	Li	In	Cl	370.87	1156	0.93	495.85	453.69	1615	0.98	520.22	429.75	2345	1.78	558.3	0.97	22.9898	-1.25448	1.31525	29.21	-1.26024	39.7	1.54	495.8	1.9	52.7	2.23	23.7	5.139	47.286	71.641	71	1.23	141	2.601	98.01	11	0.53	6.941	-1.86553	0.227209	16.51	-1.86989	21.6	1.23	520	1.55	59.8	2.05
Na	Li	Ce	Cl	370.87	1156	0.93	495.85	453.69	1615	0.98	520.22	1068	3633	1.12	534.39	0.97	22.9898	-1.25448	1.31525	29.21	-1.26024	39.7	1.54	495.8	1.9	52.7	2.23	23.7	5.139	47.286	71.641	71	1.23	141	2.601	98.01	11	0.53	6.941	-1.86553	0.227209	16.51	-1.86989	21.6	1.23	520	1.55	59.8	2.05
K	Rb	Nd	Br	336.53	1032	0.82	418.81	312.46	961	0.82	403.03	1297	3373	1.14	533.08	0.86	39.0983	-1.09652	-0.0540791	72.1	-1.09754	75.6	2.03	418.8	2.35	48.36	2.77	45.46	4.341	31.625	45.72	82	0.757	102.5	2.33	76.9	19	1.532	85.4678	-0.961937	0.0908836	88.64	-0.963335	93	2.16	403	2.48	46.89	2.98
Rb	K	Sc	Cl	312.46	961	0.82	403.03	336.53	1032	0.82	418.81	1814	3103	1.36	633.09	1.532	85.4678	-0.961937	0.0908836	88.64	-0.963335	93	2.16	403	2.48	46.89	2.98	55.9	4.177	27.28	40	91	0.363	58.2	2.34	69.2	37	0.86	39.0983	-1.09652	-0.0540791	72.1	-1.09754	75.6	2.03	418.8	2.35	48.36	2.77
Rb	Li	Nd	I	312.46	961	0.82	403.03	453.69	1615	0.98	520.22	1297	3373	1.14	533.08	1.532	85.4678	-0.961937	0.0908836	88.64	-0.963335	93	2.16	403	2.48	46.89	2.98	55.9	4.177	27.28	40	91	0.363	58.2	2.34	69.2	37	0.53	6.941	-1.86553	0.227209	16.51	-1.86989	21.6	1.23	520	1.55	59.8	2.05
Rb	Li	Sc	Cl	312.46	961	0.82	403.03	453.69	1615	0.98	520.22	1814	3103	1.36	633.09	1.532	85.4678	-0.961937	0.0908836	88.64	-0.963335	93	2.16	403	2.48	46.89	2.98	55.9	4.177	27.28	40	91	0.363	58.2	2.34	69.2	37	0.53	6.941	-1.86553	0.227209	16.51	-1.86989	21.6	1.23	520	1.55	59.8	2.05
K	Rb	Nd	Cl	336.53	1032	0.82	418.81	312.46	961	0.82	403.03	1297	3373	1.14	533.08	0.86	39.0983	-1.09652	-0.0540791	72.1	-1.09754	75.6	2.03	418.8	2.35	48.36	2.77	45.46	4.341	31.625	45.72	82	0.757	102.5	2.33	76.9	19	1.532	85.4678	-0.961937	0.0908836	88.64	-0.963335	93	2.16	403	2.48	46.89	2.98
Rb	Li	Er	Cl	312.46	961	0.82	403.03	453.69	1615	0.98	520.22	1802	3141	1.24	589.3	1.532	85.4678	-0.961937	0.0908836	88.64	-0.963335	93	2.16	403	2.48	46.89	2.98	55.9	4.177	27.28	40	91	0.363	58.2	2.34	69.2	37	0.53	6.941	-1.86553	0.227209	16.51	-1.86989	21.6	1.23	520	1.55	59.8	2.05
Rb	Li	La	Cl	312.46	961	0.82	403.03	453.69	1615	0.98	520.22	1193	3743	1.1	538.09	1.532	85.4678	-0.961937	0.0908836	88.64	-0.963335	93	2.16	403	2.48	46.89	2.98	55.9	4.177	27.28	40	91	0.363	58.2	2.34	69.2	37	0.53	6.941	-1.86553	0.227209	16.51	-1.86989	21.6	1.23	520	1.55	59.8	2.05
Rb	Li	Mo	I	312.46	961	0.82	403.03	453.69	1615	0.98	520.22	2896	4912	2.16	684.32	1.532	85.4678	-0.961937	0.0908836	88.64	-0.963335	93	2.16	403	2.48	46.89	2.98	55.9	4.177	27.28	40	91	0.363	58.2	2.34	69.2	37	0.53	6.941	-1.86553	0.227209	16.51	-1.86989	21.6	1.23	520	1.55	59.8	2.05
Rb	Li	Nd	Cl	312.46	961	0.82	403.03	453.69	1615	0.98	520.22	1297	3373	1.14	533.08	1.532	85.4678	-0.961937	0.0908836	88.64	-0.963335	93	2.16	403	2.48	46.89	2.98	55.9	4.177	27.28	40	91	0.363	58.2	2.34	69.2	37	0.53	6.941	-1.86553	0.227209	16.51	-1.86989	21.6	1.23	520	1.55	59.8	2.05
Rb	Li	Sm	Cl	312.46	961	0.82	403.03	453.69	1615	0.98	520.22	1345	2076	1.17	544.54	1.532	85.4678	-0.961937	0.0908836	88.64	-0.963335	93	2.16	403	2.48	46.89	2.98	55.9	4.177	27.28	40	91	0.363	58.2	2.34	69.2	37	0.53	6.941	-1.86553	0.227209	16.51	-1.86989	21.6	1.23	520	1.55	59.8	2.05
Rb	Na	Sc	Br	312.46	961	0.82	403.03	370.87	1156	0.93	495.85	1814	3103	1.36	633.09	1.532	85.4678	-0.961937	0.0908836	88.64	-0.963335	93	2.16	403	2.48	46.89	2.98	55.9	4.177	27.28	40	91	0.363	58.2	2.34	69.2	37	0.97	22.9898	-1.25448	1.31525	29.21	-1.26024	39.7	1.54	495.8	1.9	52.7	2.23
Rb	Li	Tm	Cl	312.46	961	0.82	403.03	453.69	1615	0.98	520.22	1818	2223	1.25	596.7	1.532	85.4678	-0.961937	0.0908836	88.64	-0.963335	93	2.16	403	2.48	46.89	2.98	55.9	4.177	27.28	40	91	0.363	58.2	2.34	69.2	37	0.53	6.941	-1.86553	0.227209	16.51	-1.86989	21.6	1.23	520	1.55	59.8	2.05
Rb	Li	Yb	Cl	312.46	961	0.82	403.03	453.69	1615	0.98	520.22	1097	1469	1.26	603.43	1.532	85.4678	-0.961937	0.0908836	88.64	-0.963335	93	2.16	403	2.48	46.89	2.98	55.9	4.177	27.28	40	91	0.363	58.2	2.34	69.2	37	0.53	6.941	-1.86553	0.227209	16.51	-1.86989	21.6	1.23	520	1.55	59.8	2.05
Rb	Na	Ga	Br	312.46	961	0.82	403.03	370.87	1156	0.93	495.85	302.91	2477	1.81	578.84	1.532	85.4678	-0.961937	0.0908836	88.64	-0.963335	93	2.16	403	2.48	46.89	2.98	55.9	4.177	27.28	40	91	0.363	58.2	2.34	69.2	37	0.97	22.9898	-1.25448	1.31525	29.21	-1.26024	39.7	1.54	495.8	1.9	52.7	2.23
K	Li	Lu	Cl	336.53	1032	0.82	418.81	453.69	1615	0.98	520.22	1925	3675	1.27	523.52	0.86	39.0983	-1.09652	-0.0540791	72.1	-1.09754	75.6	2.03	418.8	2.35	48.36	2.77	45.46	4.341	31.625	45.72	82	0.757	102.5	2.33	76.9	19	0.53	6.941	-1.86553	0.227209	16.51	-1.86989	21.6	1.23	520	1.55	59.8	2.05
K	Na	Ga	Cl	336.53	1032	0.82	418.81	370.87	1156	0.93	495.85	302.91	2477	1.81	578.84	0.86	39.0983	-1.09652	-0.0540791	72.1	-1.09754	75.6	2.03	418.8	2.35	48.36	2.77	45.46	4.341	31.625	45.72	82	0.757	102.5	2.33	76.9	19	0.97	22.9898	-1.25448	1.31525	29.21	-1.26024	39.7	1.54	495.8	1.9	52.7	2.23
K	Rb	Y	Br	336.53	1032	0.82	418.81	312.46	961	0.82	403.03	1799	3609	1.22	599.87	0.86	39.0983	-1.09652	-0.0540791	72.1	-1.09754	75.6	2.03	418.8	2.35	48.36	2.77	45.46	4.341	31.625	45.72	82	0.757	102.5	2.33	76.9	19	1.532	85.4678	-0.961937	0.0908836	88.64	-0.963335	93	2.16	403	2.48	46.89	2.98
K	Na	Pr	I	336.53	1032	0.82	418.81	370.87	1156	0.93	495.85	1208	3563	1.13	527.79	0.86	39.0983	-1.09652	-0.0540791	72.1	-1.09754	75.6	2.03	418.8	2.35	48.36	2.77	45.46	4.341	31.625	45.72	82	0.757	102.5	2.33	76.9	19	0.97	22.9898	-1.25448	1.31525	29.21	-1.26024	39.7	1.54	495.8	1.9	52.7	2.23
K	Na	Nd	Br	336.53	1032	0.82	418.81	370.87	1156	0.93	495.85	1297	3373	1.14	533.08	0.86	39.0983	-1.09652	-0.0540791	72.1	-1.09754	75.6	2.03	418.8	2.35	48.36	2.77	45.46	4.341	31.625	45.72	82	0.757	102.5	2.33	76.9	19	0.97	22.9898	-1.25448	1.31525	29.21	-1.26024	39.7	1.54	495.8	1.9	52.7	2.23
K	Li	Y	I	336.53	1032	0.82	418.81	453.69	1615	0.98	520.22	1799	3609	1.22	599.87	0.86	39.0983	-1.09652	-0.0540791	72.1	-1.09754	75.6	2.03	418.8	2.35	48.36	2.77	45.46	4.341	31.625	45.72	82	0.757	102.5	2.33	76.9	19	0.53	6.941	-1.86553	0.227209	16.51	-1.86989	21.6	1.23	520	1.55	59.8	2.05
K	Li	Sb	Br	336.53	1032	0.82	418.81	453.69	1615	0.98	520.22	903.78	1860	2.05	830.58	0.86	39.0983	-1.09652	-0.0540791	72.1	-1.09754	75.6	2.03	418.8	2.35	48.36	2.77	45.46	4.341	31.625	45.72	82	0.757	102.5	2.33	76.9	19	0.53	6.941	-1.86553	0.227209	16.51	-1.86989	21.6	1.23	520	1.55	59.8	2.05
K	Li	Sb	I	336.53	1032	0.82	418.81	453.69	1615	0.98	520.22	903.78	1860	2.05	830.58	0.86	39.0983	-1.09652	-0.0540791	72.1	-1.09754	75.6	2.03	418.8	2.35	48.36	2.77	45.46	4.341	31.625	45.72	82	0.757	102.5	2.33	76.9	19	0.53	6.941	-1.86553	0.227209	16.51	-1.86989	21.6	1.23	520	1.55	59.8	2.05
K	Li	Nd	Cl	336.53	1032	0.82	418.81	453.69	1615	0.98	520.22	1297	3373	1.14	533.08	0.86	39.0983	-1.09652	-0.0540791	72.1	-1.09754	75.6	2.03	418.8	2.35	48.36	2.77	45.46	4.341	31.625	45.72	82	0.757	102.5	2.33	76.9	19	0.53	6.941	-1.86553	0.227209	16.51	-1.86989	21.6	1.23	520	1.55	59.8	2.05
Na	Ag	Sb	Cl	370.87	1156	0.93	495.85	1234.93	2435	1.93	731	903.78	1860	2.05	830.58	0.97	22.9898	-1.25448	1.31525	29.21	-1.26024	39.7	1.54	495.8	1.9	52.7	2.23	23.7	5.139	47.286	71.641	71	1.23	141	2.601	98.01	11	10.5	107.868	-2.71998	4.05276	16.2	-2.76539	17	1.34	731	1.444	125.7	1.75
K	Rb	Ga	Cl	336.53	1032	0.82	418.81	312.46	961	0.82	403.03	302.91	2477	1.81	578.84	0.86	39.0983	-1.09652	-0.0540791	72.1	-1.09754	75.6	2.03	418.8	2.35	48.36	2.77	45.46	4.341	31.625	45.72	82	0.757	102.5	2.33	76.9	19	1.532	85.4678	-0.961937	0.0908836	88.64	-0.963335	93	2.16	403	2.48	46.89	2.98
K	Na	Sc	Cl	336.53	1032	0.82	418.81	370.87	1156	0.93	495.85	1814	3103	1.36	633.09	0.86	39.0983	-1.09652	-0.0540791	72.1	-1.09754	75.6	2.03	418.8	2.35	48.36	2.77	45.46	4.341	31.625	45.72	82	0.757	102.5	2.33	76.9	19	0.97	22.9898	-1.25448	1.31525	29.21	-1.26024	39.7	1.54	495.8	1.9	52.7	2.23
K	Na	Sb	Cl	336.53	1032	0.82	418.81	370.87	1156	0.93	495.85	903.78	1860	2.05	830.58	0.86	39.0983	-1.09652	-0.0540791	72.1	-1.09754	75.6	2.03	418.8	2.35	48.36	2.77	45.46	4.341	31.625	45.72	82	0.757	102.5	2.33	76.9	19	0.97	22.9898	-1.25448	1.31525	29.21	-1.26024	39.7	1.54	495.8	1.9	52.7	2.23
K	Na	Sc	Br	336.53	1032	0.82	418.81	370.87	1156	0.93	495.85	1814	3103	1.36	633.09	0.86	39.0983	-1.09652	-0.0540791	72.1	-1.09754	75.6	2.03	418.8	2.35	48.36	2.77	45.46	4.341	31.625	45.72	82	0.757	102.5	2.33	76.9	19	0.97	22.9898	-1.25448	1.31525	29.21	-1.26024	39.7	1.54	495.8	1.9	52.7	2.23
K	Li	Y	Cl	336.53	1032	0.82	418.81	453.69	1615	0.98	520.22	1799	3609	1.22	599.87	0.86	39.0983	-1.09652	-0.0540791	72.1	-1.09754	75.6	2.03	418.8	2.35	48.36	2.77	45.46	4.341	31.625	45.72	82	0.757	102.5	2.33	76.9	19	0.53	6.941	-1.86553	0.227209	16.51	-1.86989	21.6	1.23	520	1.55	59.8	2.05
K	Li	Mo	Br	336.53	1032	0.82	418.81	453.69	1615	0.98	520.22	2896	4912	2.16	684.32	0.86	39.0983	-1.09652	-0.0540791	72.1	-1.09754	75.6	2.03	418.8	2.35	48.36	2.77	45.46	4.341	31.625	45.72	82	0.757	102.5	2.33	76.9	19	0.53	6.941	-1.86553	0.227209	16.51	-1.86989	21.6	1.23	520	1.55	59.8	2.05
K	Ag	Mo	Cl	336.53	1032	0.82	418.81	1234.93	2435	1.93	731	2896	4912	2.16	684.32	0.86	39.0983	-1.09652	-0.0540791	72.1	-1.09754	75.6	2.03	418.8	2.35	48.36	2.77	45.46	4.341	31.625	45.72	82	0.757	102.5	2.33	76.9	19	10.5	107.868	-2.71998	4.05276	16.2	-2.76539	17	1.34	731	1.444	125.7	1.75
Rb	Cu	Bi	I	312.46	961	0.82	403.03	1357.77	3200	1.9	745.48	544.4	1837	2.02	702.95	1.532	85.4678	-0.961937	0.0908836	88.64	-0.963335	93	2.16	403	2.48	46.89	2.98	55.9	4.177	27.28	40	91	0.363	58.2	2.34	69.2	37	8.96	63.456	-3.64289	4.37874	11.08	-3.68065	11.8	1.17	745.4	1.278	118.3	1.57
Rb	Ag	Sb	Cl	312.46	961	0.82	403.03	1234.93	2435	1.93	731	903.78	1860	2.05	830.58	1.532	85.4678	-0.961937	0.0908836	88.64	-0.963335	93	2.16	403	2.48	46.89	2.98	55.9	4.177	27.28	40	91	0.363	58.2	2.34	69.2	37	10.5	107.868	-2.71998	4.05276	16.2	-2.76539	17	1.34	731	1.444	125.7	1.75
Na	Li	Nd	Cl	370.87	1156	0.93	495.85	453.69	1615	0.98	520.22	1297	3373	1.14	533.08	0.97	22.9898	-1.25448	1.31525	29.21	-1.26024	39.7	1.54	495.8	1.9	52.7	2.23	23.7	5.139	47.286	71.641	71	1.23	141	2.601	98.01	11	0.53	6.941	-1.86553	0.227209	16.51	-1.86989	21.6	1.23	520	1.55	59.8	2.05
Rb	Ag	Bi	I	312.46	961	0.82	403.03	1234.93	2435	1.93	731	544.4	1837	2.02	702.95	1.532	85.4678	-0.961937	0.0908836	88.64	-0.963335	93	2.16	403	2.48	46.89	2.98	55.9	4.177	27.28	40	91	0.363	58.2	2.34	69.2	37	10.5	107.868	-2.71998	4.05276	16.2	-2.76539	17	1.34	731	1.444	125.7	1.75
Na	Li	Dy	Cl	370.87	1156	0.93	495.85	453.69	1615	0.98	520.22	1680	2840	1.22	573.03	0.97	22.9898	-1.25448	1.31525	29.21	-1.26024	39.7	1.54	495.8	1.9	52.7	2.23	23.7	5.139	47.286	71.641	71	1.23	141	2.601	98.01	11	0.53	6.941	-1.86553	0.227209	16.51	-1.86989	21.6	1.23	520	1.55	59.8	2.05
Na	Li	Sc	Cl	370.87	1156	0.93	495.85	453.69	1615	0.98	520.22	1814	3103	1.36	633.09	0.97	22.9898	-1.25448	1.31525	29.21	-1.26024	39.7	1.54	495.8	1.9	52.7	2.23	23.7	5.139	47.286	71.641	71	1.23	141	2.601	98.01	11	0.53	6.941	-1.86553	0.227209	16.51	-1.86989	21.6	1.23	520	1.55	59.8	2.05
Rb	K	Eu	Cl	312.46	961	0.82	403.03	336.53	1032	0.82	418.81	1099	1800	1.19	547.11	1.532	85.4678	-0.961937	0.0908836	88.64	-0.963335	93	2.16	403	2.48	46.89	2.98	55.9	4.177	27.28	40	91	0.363	58.2	2.34	69.2	37	0.86	39.0983	-1.09652	-0.0540791	72.1	-1.09754	75.6	2.03	418.8	2.35	48.36	2.77
K	Rb	Bi	Br	336.53	1032	0.82	418.81	312.46	961	0.82	403.03	544.4	1837	2.02	702.95	0.86	39.0983	-1.09652	-0.0540791	72.1	-1.09754	75.6	2.03	418.8	2.35	48.36	2.77	45.46	4.341	31.625	45.72	82	0.757	102.5	2.33	76.9	19	1.532	85.4678	-0.961937	0.0908836	88.64	-0.963335	93	2.16	403	2.48	46.89	2.98
Rb	K	La	Cl	312.46	961	0.82	403.03	336.53	1032	0.82	418.81	1193	3743	1.1	538.09	1.532	85.4678	-0.961937	0.0908836	88.64	-0.963335	93	2.16	403	2.48	46.89	2.98	55.9	4.177	27.28	40	91	0.363	58.2	2.34	69.2	37	0.86	39.0983	-1.09652	-0.0540791	72.1	-1.09754	75.6	2.03	418.8	2.35	48.36	2.77
Rb	Li	Mo	Cl	312.46	961	0.82	403.03	453.69	1615	0.98	520.22	2896	4912	2.16	684.32	1.532	85.4678	-0.961937	0.0908836	88.64	-0.963335	93	2.16	403	2.48	46.89	2.98	55.9	4.177	27.28	40	91	0.363	58.2	2.34	69.2	37	0.53	6.941	-1.86553	0.227209	16.51	-1.86989	21.6	1.23	520	1.55	59.8	2.05
Rb	Na	Er	Cl	312.46	961	0.82	403.03	370.87	1156	0.93	495.85	1802	3141	1.24	589.3	1.532	85.4678	-0.961937	0.0908836	88.64	-0.963335	93	2.16	403	2.48	46.89	2.98	55.9	4.177	27.28	40	91	0.363	58.2	2.34	69.2	37	0.97	22.9898	-1.25448	1.31525	29.21	-1.26024	39.7	1.54	495.8	1.9	52.7	2.23
Rb	Na	Gd	Cl	312.46	961	0.82	403.03	370.87	1156	0.93	495.85	1585	3523	1.2	593.37	1.532	85.4678	-0.961937	0.0908836	88.64	-0.963335	93	2.16	403	2.48	46.89	2.98	55.9	4.177	27.28	40	91	0.363	58.2	2.34	69.2	37	0.97	22.9898	-1.25448	1.31525	29.21	-1.26024	39.7	1.54	495.8	1.9	52.7	2.23
Rb	Na	Pr	Cl	312.46	961	0.82	403.03	370.87	1156	0.93	495.85	1208	3563	1.13	527.79	1.532	85.4678	-0.961937	0.0908836	88.64	-0.963335	93	2.16	403	2.48	46.89	2.98	55.9	4.177	27.28	40	91	0.363	58.2	2.34	69.2	37	0.97	22.9898	-1.25448	1.31525	29.21	-1.26024	39.7	1.54	495.8	1.9	52.7	2.23
Rb	Na	Pr	I	312.46	961	0.82	403.03	370.87	1156	0.93	495.85	1208	3563	1.13	527.79	1.532	85.4678	-0.961937	0.0908836	88.64	-0.963335	93	2.16	403	2.48	46.89	2.98	55.9	4.177	27.28	40	91	0.363	58.2	2.34	69.2	37	0.97	22.9898	-1.25448	1.31525	29.21	-1.26024	39.7	1.54	495.8	1.9	52.7	2.23
Rb	Li	Eu	Cl	312.46	961	0.82	403.03	453.69	1615	0.98	520.22	1099	1800	1.19	547.11	1.532	85.4678	-0.961937	0.0908836	88.64	-0.963335	93	2.16	403	2.48	46.89	2.98	55.9	4.177	27.28	40	91	0.363	58.2	2.34	69.2	37	0.53	6.941	-1.86553	0.227209	16.51	-1.86989	21.6	1.23	520	1.55	59.8	2.05
Rb	K	Tm	Cl	312.46	961	0.82	403.03	336.53	1032	0.82	418.81	1818	2223	1.25	596.7	1.532	85.4678	-0.961937	0.0908836	88.64	-0.963335	93	2.16	403	2.48	46.89	2.98	55.9	4.177	27.28	40	91	0.363	58.2	2.34	69.2	37	0.86	39.0983	-1.09652	-0.0540791	72.1	-1.09754	75.6	2.03	418.8	2.35	48.36	2.77
Rb	Li	Ce	I	312.46	961	0.82	403.03	453.69	1615	0.98	520.22	1068	3633	1.12	534.39	1.532	85.4678	-0.961937	0.0908836	88.64	-0.963335	93	2.16	403	2.48	46.89	2.98	55.9	4.177	27.28	40	91	0.363	58.2	2.34	69.2	37	0.53	6.941	-1.86553	0.227209	16.51	-1.86989	21.6	1.23	520	1.55	59.8	2.05
Rb	Li	Y	Cl	312.46	961	0.82	403.03	453.69	1615	0.98	520.22	1799	3609	1.22	599.87	1.532	85.4678	-0.961937	0.0908836	88.64	-0.963335	93	2.16	403	2.48	46.89	2.98	55.9	4.177	27.28	40	91	0.363	58.2	2.34	69.2	37	0.53	6.941	-1.86553	0.227209	16.51	-1.86989	21.6	1.23	520	1.55	59.8	2.05
Rb	K	Ga	Cl	312.46	961	0.82	403.03	336.53	1032	0.82	418.81	302.91	2477	1.81	578.84	1.532	85.4678	-0.961937	0.0908836	88.64	-0.963335	93	2.16	403	2.48	46.89	2.98	55.9	4.177	27.28	40	91	0.363	58.2	2.34	69.2	37	0.86	39.0983	-1.09652	-0.0540791	72.1	-1.09754	75.6	2.03	418.8	2.35	48.36	2.77
Rb	Na	Sc	Cl	312.46	961	0.82	403.03	370.87	1156	0.93	495.85	1814	3103	1.36	633.09	1.532	85.4678	-0.961937	0.0908836	88.64	-0.963335	93	2.16	403	2.48	46.89	2.98	55.9	4.177	27.28	40	91	0.363	58.2	2.34	69.2	37	0.97	22.9898	-1.25448	1.31525	29.21	-1.26024	39.7	1.54	495.8	1.9	52.7	2.23
Rb	Li	Ru	Cl	312.46	961	0.82	403.03	453.69	1615	0.98	520.22	2607	4423	2.2	710.18	1.532	85.4678	-0.961937	0.0908836	88.64	-0.963335	93	2.16	403	2.48	46.89	2.98	55.9	4.177	27.28	40	91	0.363	58.2	2.34	69.2	37	0.53	6.941	-1.86553	0.227209	16.51	-1.86989	21.6	1.23	520	1.55	59.8	2.05
Rb	Na	Sb	Cl	312.46	961	0.82	403.03	370.87	1156	0.93	495.85	903.78	1860	2.05	830.58	1.532	85.4678	-0.961937	0.0908836	88.64	-0.963335	93	2.16	403	2.48	46.89	2.98	55.9	4.177	27.28	40	91	0.363	58.2	2.34	69.2	37	0.97	22.9898	-1.25448	1.31525	29.21	-1.26024	39.7	1.54	495.8	1.9	52.7	2.23
K	Na	In	Cl	336.53	1032	0.82	418.81	370.87	1156	0.93	495.85	429.75	2345	1.78	558.3	0.86	39.0983	-1.09652	-0.0540791	72.1	-1.09754	75.6	2.03	418.8	2.35	48.36	2.77	45.46	4.341	31.625	45.72	82	0.757	102.5	2.33	76.9	19	0.97	22.9898	-1.25448	1.31525	29.21	-1.26024	39.7	1.54	495.8	1.9	52.7	2.23
Na	Cu	Bi	Br	370.87	1156	0.93	495.85	1357.77	3200	1.9	745.48	544.4	1837	2.02	702.95	0.97	22.9898	-1.25448	1.31525	29.21	-1.26024	39.7	1.54	495.8	1.9	52.7	2.23	23.7	5.139	47.286	71.641	71	1.23	141	2.601	98.01	11	8.96	63.456	-3.64289	4.37874	11.08	-3.68065	11.8	1.17	745.4	1.278	118.3	1.57
K	Rb	In	Cl	336.53	1032	0.82	418.81	312.46	961	0.82	403.03	429.75	2345	1.78	558.3	0.86	39.0983	-1.09652	-0.0540791	72.1	-1.09754	75.6	2.03	418.8	2.35	48.36	2.77	45.46	4.341	31.625	45.72	82	0.757	102.5	2.33	76.9	19	1.532	85.4678	-0.961937	0.0908836	88.64	-0.963335	93	2.16	403	2.48	46.89	2.98
K	Rb	Er	Cl	336.53	1032	0.82	418.81	312.46	961	0.82	403.03	1802	3141	1.24	589.3	0.86	39.0983	-1.09652	-0.0540791	72.1	-1.09754	75.6	2.03	418.8	2.35	48.36	2.77	45.46	4.341	31.625	45.72	82	0.757	102.5	2.33	76.9	19	1.532	85.4678	-0.961937	0.0908836	88.64	-0.963335	93	2.16	403	2.48	46.89	2.98
K	Na	Pr	Br	336.53	1032	0.82	418.81	370.87	1156	0.93	495.85	1208	3563	1.13	527.79	0.86	39.0983	-1.09652	-0.0540791	72.1	-1.09754	75.6	2.03	418.8	2.35	48.36	2.77	45.46	4.341	31.625	45.72	82	0.757	102.5	2.33	76.9	19	0.97	22.9898	-1.25448	1.31525	29.21	-1.26024	39.7	1.54	495.8	1.9	52.7	2.23
K	Na	Gd	Cl	336.53	1032	0.82	418.81	370.87	1156	0.93	495.85	1585	3523	1.2	593.37	0.86	39.0983	-1.09652	-0.0540791	72.1	-1.09754	75.6	2.03	418.8	2.35	48.36	2.77	45.46	4.341	31.625	45.72	82	0.757	102.5	2.33	76.9	19	0.97	22.9898	-1.25448	1.31525	29.21	-1.26024	39.7	1.54	495.8	1.9	52.7	2.23
K	Li	Mo	I	336.53	1032	0.82	418.81	453.69	1615	0.98	520.22	2896	4912	2.16	684.32	0.86	39.0983	-1.09652	-0.0540791	72.1	-1.09754	75.6	2.03	418.8	2.35	48.36	2.77	45.46	4.341	31.625	45.72	82	0.757	102.5	2.33	76.9	19	0.53	6.941	-1.86553	0.227209	16.51	-1.86989	21.6	1.23	520	1.55	59.8	2.05
K	Li	Nd	Br	336.53	1032	0.82	418.81	453.69	1615	0.98	520.22	1297	3373	1.14	533.08	0.86	39.0983	-1.09652	-0.0540791	72.1	-1.09754	75.6	2.03	418.8	2.35	48.36	2.77	45.46	4.341	31.625	45.72	82	0.757	102.5	2.33	76.9	19	0.53	6.941	-1.86553	0.227209	16.51	-1.86989	21.6	1.23	520	1.55	59.8	2.05
K	Li	Er	Cl	336.53	1032	0.82	418.81	453.69	1615	0.98	520.22	1802	3141	1.24	589.3	0.86	39.0983	-1.09652	-0.0540791	72.1	-1.09754	75.6	2.03	418.8	2.35	48.36	2.77	45.46	4.341	31.625	45.72	82	0.757	102.5	2.33	76.9	19	0.53	6.941	-1.86553	0.227209	16.51	-1.86989	21.6	1.23	520	1.55	59.8	2.05
K	Rb	Ga	I	336.53	1032	0.82	418.81	312.46	961	0.82	403.03	302.91	2477	1.81	578.84	0.86	39.0983	-1.09652	-0.0540791	72.1	-1.09754	75.6	2.03	418.8	2.35	48.36	2.77	45.46	4.341	31.625	45.72	82	0.757	102.5	2.33	76.9	19	1.532	85.4678	-0.961937	0.0908836	88.64	-0.963335	93	2.16	403	2.48	46.89	2.98
K	Na	Sc	I	336.53	1032	0.82	418.81	370.87	1156	0.93	495.85	1814	3103	1.36	633.09	0.86	39.0983	-1.09652	-0.0540791	72.1	-1.09754	75.6	2.03	418.8	2.35	48.36	2.77	45.46	4.341	31.625	45.72	82	0.757	102.5	2.33	76.9	19	0.97	22.9898	-1.25448	1.31525	29.21	-1.26024	39.7	1.54	495.8	1.9	52.7	2.23
K	Na	Dy	Cl	336.53	1032	0.82	418.81	370.87	1156	0.93	495.85	1680	2840	1.22	573.03	0.86	39.0983	-1.09652	-0.0540791	72.1	-1.09754	75.6	2.03	418.8	2.35	48.36	2.77	45.46	4.341	31.625	45.72	82	0.757	102.5	2.33	76.9	19	0.97	22.9898	-1.25448	1.31525	29.21	-1.26024	39.7	1.54	495.8	1.9	52.7	2.23
K	Li	Tm	Cl	336.53	1032	0.82	418.81	453.69	1615	0.98	520.22	1818	2223	1.25	596.7	0.86	39.0983	-1.09652	-0.0540791	72.1	-1.09754	75.6	2.03	418.8	2.35	48.36	2.77	45.46	4.341	31.625	45.72	82	0.757	102.5	2.33	76.9	19	0.53	6.941	-1.86553	0.227209	16.51	-1.86989	21.6	1.23	520	1.55	59.8	2.05
K	Li	Sc	Cl	336.53	1032	0.82	418.81	453.69	1615	0.98	520.22	1814	3103	1.36	633.09	0.86	39.0983	-1.09652	-0.0540791	72.1	-1.09754	75.6	2.03	418.8	2.35	48.36	2.77	45.46	4.341	31.625	45.72	82	0.757	102.5	2.33	76.9	19	0.53	6.941	-1.86553	0.227209	16.51	-1.86989	21.6	1.23	520	1.55	59.8	2.05
K	Cu	Sb	Br	336.53	1032	0.82	418.81	1357.77	3200	1.9	745.48	903.78	1860	2.05	830.58	0.86	39.0983	-1.09652	-0.0540791	72.1	-1.09754	75.6	2.03	418.8	2.35	48.36	2.77	45.46	4.341	31.625	45.72	82	0.757	102.5	2.33	76.9	19	8.96	63.456	-3.64289	4.37874	11.08	-3.68065	11.8	1.17	745.4	1.278	118.3	1.57
K	Cu	Mo	I	336.53	1032	0.82	418.81	1357.77	3200	1.9	745.48	2896	4912	2.16	684.32	0.86	39.0983	-1.09652	-0.0540791	72.1	-1.09754	75.6	2.03	418.8	2.35	48.36	2.77	45.46	4.341	31.625	45.72	82	0.757	102.5	2.33	76.9	19	8.96	63.456	-3.64289	4.37874	11.08	-3.68065	11.8	1.17	745.4	1.278	118.3	1.57
K	Cu	Sb	Cl	336.53	1032	0.82	418.81	1357.77	3200	1.9	745.48	903.78	1860	2.05	830.58	0.86	39.0983	-1.09652	-0.0540791	72.1	-1.09754	75.6	2.03	418.8	2.35	48.36	2.77	45.46	4.341	31.625	45.72	82	0.757	102.5	2.33	76.9	19	8.96	63.456	-3.64289	4.37874	11.08	-3.68065	11.8	1.17	745.4	1.278	118.3	1.57
K	Ag	Sb	Br	336.53	1032	0.82	418.81	1234.93	2435	1.93	731	903.78	1860	2.05	830.58	0.86	39.0983	-1.09652	-0.0540791	72.1	-1.09754	75.6	2.03	418.8	2.35	48.36	2.77	45.46	4.341	31.625	45.72	82	0.757	102.5	2.33	76.9	19	10.5	107.868	-2.71998	4.05276	16.2	-2.76539	17	1.34	731	1.444	125.7	1.75
Rb	Cu	Bi	Br	312.46	961	0.82	403.03	1357.77	3200	1.9	745.48	544.4	1837	2.02	702.95	1.532	85.4678	-0.961937	0.0908836	88.64	-0.963335	93	2.16	403	2.48	46.89	2.98	55.9	4.177	27.28	40	91	0.363	58.2	2.34	69.2	37	8.96	63.456	-3.64289	4.37874	11.08	-3.68065	11.8	1.17	745.4	1.278	118.3	1.57
Rb	Cu	Bi	Cl	312.46	961	0.82	403.03	1357.77	3200	1.9	745.48	544.4	1837	2.02	702.95	1.532	85.4678	-0.961937	0.0908836	88.64	-0.963335	93	2.16	403	2.48	46.89	2.98	55.9	4.177	27.28	40	91	0.363	58.2	2.34	69.2	37	8.96	63.456	-3.64289	4.37874	11.08	-3.68065	11.8	1.17	745.4	1.278	118.3	1.57
Rb	Cu	Mo	Br	312.46	961	0.82	403.03	1357.77	3200	1.9	745.48	2896	4912	2.16	684.32	1.532	85.4678	-0.961937	0.0908836	88.64	-0.963335	93	2.16	403	2.48	46.89	2.98	55.9	4.177	27.28	40	91	0.363	58.2	2.34	69.2	37	8.96	63.456	-3.64289	4.37874	11.08	-3.68065	11.8	1.17	745.4	1.278	118.3	1.57
Rb	Ag	Sb	I	312.46	961	0.82	403.03	1234.93	2435	1.93	731	903.78	1860	2.05	830.58	1.532	85.4678	-0.961937	0.0908836	88.64	-0.963335	93	2.16	403	2.48	46.89	2.98	55.9	4.177	27.28	40	91	0.363	58.2	2.34	69.2	37	10.5	107.868	-2.71998	4.05276	16.2	-2.76539	17	1.34	731	1.444	125.7	1.75
Rb	K	Ga	I	312.46	961	0.82	403.03	336.53	1032	0.82	418.81	302.91	2477	1.81	578.84	1.532	85.4678	-0.961937	0.0908836	88.64	-0.963335	93	2.16	403	2.48	46.89	2.98	55.9	4.177	27.28	40	91	0.363	58.2	2.34	69.2	37	0.86	39.0983	-1.09652	-0.0540791	72.1	-1.09754	75.6	2.03	418.8	2.35	48.36	2.77
K	Rb	Pr	Br	336.53	1032	0.82	418.81	312.46	961	0.82	403.03	1208	3563	1.13	527.79	0.86	39.0983	-1.09652	-0.0540791	72.1	-1.09754	75.6	2.03	418.8	2.35	48.36	2.77	45.46	4.341	31.625	45.72	82	0.757	102.5	2.33	76.9	19	1.532	85.4678	-0.961937	0.0908836	88.64	-0.963335	93	2.16	403	2.48	46.89	2.98
Rb	K	Sc	Br	312.46	961	0.82	403.03	336.53	1032	0.82	418.81	1814	3103	1.36	633.09	1.532	85.4678	-0.961937	0.0908836	88.64	-0.963335	93	2.16	403	2.48	46.89	2.98	55.9	4.177	27.28	40	91	0.363	58.2	2.34	69.2	37	0.86	39.0983	-1.09652	-0.0540791	72.1	-1.09754	75.6	2.03	418.8	2.35	48.36	2.77
Rb	Na	Al	Cl	312.46	961	0.82	403.03	370.87	1156	0.93	495.85	933.47	2792	1.61	577.54	1.532	85.4678	-0.961937	0.0908836	88.64	-0.963335	93	2.16	403	2.48	46.89	2.98	55.9	4.177	27.28	40	91	0.363	58.2	2.34	69.2	37	0.97	22.9898	-1.25448	1.31525	29.21	-1.26024	39.7	1.54	495.8	1.9	52.7	2.23
Rb	Na	La	Cl	312.46	961	0.82	403.03	370.87	1156	0.93	495.85	1193	3743	1.1	538.09	1.532	85.4678	-0.961937	0.0908836	88.64	-0.963335	93	2.16	403	2.48	46.89	2.98	55.9	4.177	27.28	40	91	0.363	58.2	2.34	69.2	37	0.97	22.9898	-1.25448	1.31525	29.21	-1.26024	39.7	1.54	495.8	1.9	52.7	2.23
Rb	K	In	I	312.46	961	0.82	403.03	336.53	1032	0.82	418.81	429.75	2345	1.78	558.3	1.532	85.4678	-0.961937	0.0908836	88.64	-0.963335	93	2.16	403	2.48	46.89	2.98	55.9	4.177	27.28	40	91	0.363	58.2	2.34	69.2	37	0.86	39.0983	-1.09652	-0.0540791	72.1	-1.09754	75.6	2.03	418.8	2.35	48.36	2.77
K	Rb	Bi	Cl	336.53	1032	0.82	418.81	312.46	961	0.82	403.03	544.4	1837	2.02	702.95	0.86	39.0983	-1.09652	-0.0540791	72.1	-1.09754	75.6	2.03	418.8	2.35	48.36	2.77	45.46	4.341	31.625	45.72	82	0.757	102.5	2.33	76.9	19	1.532	85.4678	-0.961937	0.0908836	88.64	-0.963335	93	2.16	403	2.48	46.89	2.98
K	Rb	Bi	I	336.53	1032	0.82	418.81	312.46	961	0.82	403.03	544.4	1837	2.02	702.95	0.86	39.0983	-1.09652	-0.0540791	72.1	-1.09754	75.6	2.03	418.8	2.35	48.36	2.77	45.46	4.341	31.625	45.72	82	0.757	102.5	2.33	76.9	19	1.532	85.4678	-0.961937	0.0908836	88.64	-0.963335	93	2.16	403	2.48	46.89	2.98
Rb	K	Dy	Cl	312.46	961	0.82	403.03	336.53	1032	0.82	418.81	1680	2840	1.22	573.03	1.532	85.4678	-0.961937	0.0908836	88.64	-0.963335	93	2.16	403	2.48	46.89	2.98	55.9	4.177	27.28	40	91	0.363	58.2	2.34	69.2	37	0.86	39.0983	-1.09652	-0.0540791	72.1	-1.09754	75.6	2.03	418.8	2.35	48.36	2.77
Rb	K	Er	Cl	312.46	961	0.82	403.03	336.53	1032	0.82	418.81	1802	3141	1.24	589.3	1.532	85.4678	-0.961937	0.0908836	88.64	-0.963335	93	2.16	403	2.48	46.89	2.98	55.9	4.177	27.28	40	91	0.363	58.2	2.34	69.2	37	0.86	39.0983	-1.09652	-0.0540791	72.1	-1.09754	75.6	2.03	418.8	2.35	48.36	2.77
Rb	Li	Bi	Cl	312.46	961	0.82	403.03	453.69	1615	0.98	520.22	544.4	1837	2.02	702.95	1.532	85.4678	-0.961937	0.0908836	88.64	-0.963335	93	2.16	403	2.48	46.89	2.98	55.9	4.177	27.28	40	91	0.363	58.2	2.34	69.2	37	0.53	6.941	-1.86553	0.227209	16.51	-1.86989	21.6	1.23	520	1.55	59.8	2.05
Rb	Li	Pr	Cl	312.46	961	0.82	403.03	453.69	1615	0.98	520.22	1208	3563	1.13	527.79	1.532	85.4678	-0.961937	0.0908836	88.64	-0.963335	93	2.16	403	2.48	46.89	2.98	55.9	4.177	27.28	40	91	0.363	58.2	2.34	69.2	37	0.53	6.941	-1.86553	0.227209	16.51	-1.86989	21.6	1.23	520	1.55	59.8	2.05
Rb	Na	Bi	I	312.46	961	0.82	403.03	370.87	1156	0.93	495.85	544.4	1837	2.02	702.95	1.532	85.4678	-0.961937	0.0908836	88.64	-0.963335	93	2.16	403	2.48	46.89	2.98	55.9	4.177	27.28	40	91	0.363	58.2	2.34	69.2	37	0.97	22.9898	-1.25448	1.31525	29.21	-1.26024	39.7	1.54	495.8	1.9	52.7	2.23
Rb	Na	In	I	312.46	961	0.82	403.03	370.87	1156	0.93	495.85	429.75	2345	1.78	558.3	1.532	85.4678	-0.961937	0.0908836	88.64	-0.963335	93	2.16	403	2.48	46.89	2.98	55.9	4.177	27.28	40	91	0.363	58.2	2.34	69.2	37	0.97	22.9898	-1.25448	1.31525	29.21	-1.26024	39.7	1.54	495.8	1.9	52.7	2.23
Rb	Na	Y	I	312.46	961	0.82	403.03	370.87	1156	0.93	495.85	1799	3609	1.22	599.87	1.532	85.4678	-0.961937	0.0908836	88.64	-0.963335	93	2.16	403	2.48	46.89	2.98	55.9	4.177	27.28	40	91	0.363	58.2	2.34	69.2	37	0.97	22.9898	-1.25448	1.31525	29.21	-1.26024	39.7	1.54	495.8	1.9	52.7	2.23
Rb	Na	Ga	Cl	312.46	961	0.82	403.03	370.87	1156	0.93	495.85	302.91	2477	1.81	578.84	1.532	85.4678	-0.961937	0.0908836	88.64	-0.963335	93	2.16	403	2.48	46.89	2.98	55.9	4.177	27.28	40	91	0.363	58.2	2.34	69.2	37	0.97	22.9898	-1.25448	1.31525	29.21	-1.26024	39.7	1.54	495.8	1.9	52.7	2.23
Rb	Li	V	Cl	312.46	961	0.82	403.03	453.69	1615	0.98	520.22	2183	3680	1.63	650.91	1.532	85.4678	-0.961937	0.0908836	88.64	-0.963335	93	2.16	403	2.48	46.89	2.98	55.9	4.177	27.28	40	91	0.363	58.2	2.34	69.2	37	0.53	6.941	-1.86553	0.227209	16.51	-1.86989	21.6	1.23	520	1.55	59.8	2.05
Rb	Na	Bi	Cl	312.46	961	0.82	403.03	370.87	1156	0.93	495.85	544.4	1837	2.02	702.95	1.532	85.4678	-0.961937	0.0908836	88.64	-0.963335	93	2.16	403	2.48	46.89	2.98	55.9	4.177	27.28	40	91	0.363	58.2	2.34	69.2	37	0.97	22.9898	-1.25448	1.31525	29.21	-1.26024	39.7	1.54	495.8	1.9	52.7	2.23
Rb	Li	In	Cl	312.46	961	0.82	403.03	453.69	1615	0.98	520.22	429.75	2345	1.78	558.3	1.532	85.4678	-0.961937	0.0908836	88.64	-0.963335	93	2.16	403	2.48	46.89	2.98	55.9	4.177	27.28	40	91	0.363	58.2	2.34	69.2	37	0.53	6.941	-1.86553	0.227209	16.51	-1.86989	21.6	1.23	520	1.55	59.8	2.05
Rb	K	Sc	I	312.46	961	0.82	403.03	336.53	1032	0.82	418.81	1814	3103	1.36	633.09	1.532	85.4678	-0.961937	0.0908836	88.64	-0.963335	93	2.16	403	2.48	46.89	2.98	55.9	4.177	27.28	40	91	0.363	58.2	2.34	69.2	37	0.86	39.0983	-1.09652	-0.0540791	72.1	-1.09754	75.6	2.03	418.8	2.35	48.36	2.77
Li	Cu	Sb	Cl	453.69	1615	0.98	520.22	1357.77	3200	1.9	745.48	903.78	1860	2.05	830.58	0.53	6.941	-1.86553	0.227209	16.51	-1.86989	21.6	1.23	520	1.55	59.8	2.05	13.1	5.392	76.638	122.451	46	3.582	84.7	3	147.1	3	8.96	63.456	-3.64289	4.37874	11.08	-3.68065	11.8	1.17	745.4	1.278	118.3	1.57
K	Li	Ce	Br	336.53	1032	0.82	418.81	453.69	1615	0.98	520.22	1068	3633	1.12	534.39	0.86	39.0983	-1.09652	-0.0540791	72.1	-1.09754	75.6	2.03	418.8	2.35	48.36	2.77	45.46	4.341	31.625	45.72	82	0.757	102.5	2.33	76.9	19	0.53	6.941	-1.86553	0.227209	16.51	-1.86989	21.6	1.23	520	1.55	59.8	2.05
K	Rb	Lu	Cl	336.53	1032	0.82	418.81	312.46	961	0.82	403.03	1925	3675	1.27	523.52	0.86	39.0983	-1.09652	-0.0540791	72.1	-1.09754	75.6	2.03	418.8	2.35	48.36	2.77	45.46	4.341	31.625	45.72	82	0.757	102.5	2.33	76.9	19	1.532	85.4678	-0.961937	0.0908836	88.64	-0.963335	93	2.16	403	2.48	46.89	2.98
K	Rb	Ga	Br	336.53	1032	0.82	418.81	312.46	961	0.82	403.03	302.91	2477	1.81	578.84	0.86	39.0983	-1.09652	-0.0540791	72.1	-1.09754	75.6	2.03	418.8	2.35	48.36	2.77	45.46	4.341	31.625	45.72	82	0.757	102.5	2.33	76.9	19	1.532	85.4678	-0.961937	0.0908836	88.64	-0.963335	93	2.16	403	2.48	46.89	2.98
K	Na	Sm	Cl	336.53	1032	0.82	418.81	370.87	1156	0.93	495.85	1345	2076	1.17	544.54	0.86	39.0983	-1.09652	-0.0540791	72.1	-1.09754	75.6	2.03	418.8	2.35	48.36	2.77	45.46	4.341	31.625	45.72	82	0.757	102.5	2.33	76.9	19	0.97	22.9898	-1.25448	1.31525	29.21	-1.26024	39.7	1.54	495.8	1.9	52.7	2.23
K	Na	Nd	Cl	336.53	1032	0.82	418.81	370.87	1156	0.93	495.85	1297	3373	1.14	533.08	0.86	39.0983	-1.09652	-0.0540791	72.1	-1.09754	75.6	2.03	418.8	2.35	48.36	2.77	45.46	4.341	31.625	45.72	82	0.757	102.5	2.33	76.9	19	0.97	22.9898	-1.25448	1.31525	29.21	-1.26024	39.7	1.54	495.8	1.9	52.7	2.23
K	Li	Pr	Cl	336.53	1032	0.82	418.81	453.69	1615	0.98	520.22	1208	3563	1.13	527.79	0.86	39.0983	-1.09652	-0.0540791	72.1	-1.09754	75.6	2.03	418.8	2.35	48.36	2.77	45.46	4.341	31.625	45.72	82	0.757	102.5	2.33	76.9	19	0.53	6.941	-1.86553	0.227209	16.51	-1.86989	21.6	1.23	520	1.55	59.8	2.05
K	Na	Mo	I	336.53	1032	0.82	418.81	370.87	1156	0.93	495.85	2896	4912	2.16	684.32	0.86	39.0983	-1.09652	-0.0540791	72.1	-1.09754	75.6	2.03	418.8	2.35	48.36	2.77	45.46	4.341	31.625	45.72	82	0.757	102.5	2.33	76.9	19	0.97	22.9898	-1.25448	1.31525	29.21	-1.26024	39.7	1.54	495.8	1.9	52.7	2.23
K	Li	Mo	Cl	336.53	1032	0.82	418.81	453.69	1615	0.98	520.22	2896	4912	2.16	684.32	0.86	39.0983	-1.09652	-0.0540791	72.1	-1.09754	75.6	2.03	418.8	2.35	48.36	2.77	45.46	4.341	31.625	45.72	82	0.757	102.5	2.33	76.9	19	0.53	6.941	-1.86553	0.227209	16.51	-1.86989	21.6	1.23	520	1.55	59.8	2.05
K	Ag	Sb	I	336.53	1032	0.82	418.81	1234.93	2435	1.93	731	903.78	1860	2.05	830.58	0.86	39.0983	-1.09652	-0.0540791	72.1	-1.09754	75.6	2.03	418.8	2.35	48.36	2.77	45.46	4.341	31.625	45.72	82	0.757	102.5	2.33	76.9	19	10.5	107.868	-2.71998	4.05276	16.2	-2.76539	17	1.34	731	1.444	125.7	1.75
K	Ag	Bi	I	336.53	1032	0.82	418.81	1234.93	2435	1.93	731	544.4	1837	2.02	702.95	0.86	39.0983	-1.09652	-0.0540791	72.1	-1.09754	75.6	2.03	418.8	2.35	48.36	2.77	45.46	4.341	31.625	45.72	82	0.757	102.5	2.33	76.9	19	10.5	107.868	-2.71998	4.05276	16.2	-2.76539	17	1.34	731	1.444	125.7	1.75
Na	Li	Lu	Cl	370.87	1156	0.93	495.85	453.69	1615	0.98	520.22	1925	3675	1.27	523.52	0.97	22.9898	-1.25448	1.31525	29.21	-1.26024	39.7	1.54	495.8	1.9	52.7	2.23	23.7	5.139	47.286	71.641	71	1.23	141	2.601	98.01	11	0.53	6.941	-1.86553	0.227209	16.51	-1.86989	21.6	1.23	520	1.55	59.8	2.05
Rb	Cu	Sb	Cl	312.46	961	0.82	403.03	1357.77	3200	1.9	745.48	903.78	1860	2.05	830.58	1.532	85.4678	-0.961937	0.0908836	88.64	-0.963335	93	2.16	403	2.48	46.89	2.98	55.9	4.177	27.28	40	91	0.363	58.2	2.34	69.2	37	8.96	63.456	-3.64289	4.37874	11.08	-3.68065	11.8	1.17	745.4	1.278	118.3	1.57
Rb	Ag	Mo	I	312.46	961	0.82	403.03	1234.93	2435	1.93	731	2896	4912	2.16	684.32	1.532	85.4678	-0.961937	0.0908836	88.64	-0.963335	93	2.16	403	2.48	46.89	2.98	55.9	4.177	27.28	40	91	0.363	58.2	2.34	69.2	37	10.5	107.868	-2.71998	4.05276	16.2	-2.76539	17	1.34	731	1.444	125.7	1.75
Rb	Ag	Sb	Br	312.46	961	0.82	403.03	1234.93	2435	1.93	731	903.78	1860	2.05	830.58	1.532	85.4678	-0.961937	0.0908836	88.64	-0.963335	93	2.16	403	2.48	46.89	2.98	55.9	4.177	27.28	40	91	0.363	58.2	2.34	69.2	37	10.5	107.868	-2.71998	4.05276	16.2	-2.76539	17	1.34	731	1.444	125.7	1.75
Na	Li	Bi	Br	370.87	1156	0.93	495.85	453.69	1615	0.98	520.22	544.4	1837	2.02	702.95	0.97	22.9898	-1.25448	1.31525	29.21	-1.26024	39.7	1.54	495.8	1.9	52.7	2.23	23.7	5.139	47.286	71.641	71	1.23	141	2.601	98.01	11	0.53	6.941	-1.86553	0.227209	16.51	-1.86989	21.6	1.23	520	1.55	59.8	2.05
Na	Li	Y	Br	370.87	1156	0.93	495.85	453.69	1615	0.98	520.22	1799	3609	1.22	599.87	0.97	22.9898	-1.25448	1.31525	29.21	-1.26024	39.7	1.54	495.8	1.9	52.7	2.23	23.7	5.139	47.286	71.641	71	1.23	141	2.601	98.01	11	0.53	6.941	-1.86553	0.227209	16.51	-1.86989	21.6	1.23	520	1.55	59.8	2.05
K	Rb	Mo	Cl	336.53	1032	0.82	418.81	312.46	961	0.82	403.03	2896	4912	2.16	684.32	0.86	39.0983	-1.09652	-0.0540791	72.1	-1.09754	75.6	2.03	418.8	2.35	48.36	2.77	45.46	4.341	31.625	45.72	82	0.757	102.5	2.33	76.9	19	1.532	85.4678	-0.961937	0.0908836	88.64	-0.963335	93	2.16	403	2.48	46.89	2.98
Rb	Li	Ce	Cl	312.46	961	0.82	403.03	453.69	1615	0.98	520.22	1068	3633	1.12	534.39	1.532	85.4678	-0.961937	0.0908836	88.64	-0.963335	93	2.16	403	2.48	46.89	2.98	55.9	4.177	27.28	40	91	0.363	58.2	2.34	69.2	37	0.53	6.941	-1.86553	0.227209	16.51	-1.86989	21.6	1.23	520	1.55	59.8	2.05
Rb	Na	Lu	Cl	312.46	961	0.82	403.03	370.87	1156	0.93	495.85	1925	3675	1.27	523.52	1.532	85.4678	-0.961937	0.0908836	88.64	-0.963335	93	2.16	403	2.48	46.89	2.98	55.9	4.177	27.28	40	91	0.363	58.2	2.34	69.2	37	0.97	22.9898	-1.25448	1.31525	29.21	-1.26024	39.7	1.54	495.8	1.9	52.7	2.23
Rb	Na	Mo	Br	312.46	961	0.82	403.03	370.87	1156	0.93	495.85	2896	4912	2.16	684.32	1.532	85.4678	-0.961937	0.0908836	88.64	-0.963335	93	2.16	403	2.48	46.89	2.98	55.9	4.177	27.28	40	91	0.363	58.2	2.34	69.2	37	0.97	22.9898	-1.25448	1.31525	29.21	-1.26024	39.7	1.54	495.8	1.9	52.7	2.23
Rb	Na	Sc	I	312.46	961	0.82	403.03	370.87	1156	0.93	495.85	1814	3103	1.36	633.09	1.532	85.4678	-0.961937	0.0908836	88.64	-0.963335	93	2.16	403	2.48	46.89	2.98	55.9	4.177	27.28	40	91	0.363	58.2	2.34	69.2	37	0.97	22.9898	-1.25448	1.31525	29.21	-1.26024	39.7	1.54	495.8	1.9	52.7	2.23
K	Rb	Ce	Br	336.53	1032	0.82	418.81	312.46	961	0.82	403.03	1068	3633	1.12	534.39	0.86	39.0983	-1.09652	-0.0540791	72.1	-1.09754	75.6	2.03	418.8	2.35	48.36	2.77	45.46	4.341	31.625	45.72	82	0.757	102.5	2.33	76.9	19	1.532	85.4678	-0.961937	0.0908836	88.64	-0.963335	93	2.16	403	2.48	46.89	2.98
Rb	K	In	Br	312.46	961	0.82	403.03	336.53	1032	0.82	418.81	429.75	2345	1.78	558.3	1.532	85.4678	-0.961937	0.0908836	88.64	-0.963335	93	2.16	403	2.48	46.89	2.98	55.9	4.177	27.28	40	91	0.363	58.2	2.34	69.2	37	0.86	39.0983	-1.09652	-0.0540791	72.1	-1.09754	75.6	2.03	418.8	2.35	48.36	2.77
Rb	Li	Dy	Cl	312.46	961	0.82	403.03	453.69	1615	0.98	520.22	1680	2840	1.22	573.03	1.532	85.4678	-0.961937	0.0908836	88.64	-0.963335	93	2.16	403	2.48	46.89	2.98	55.9	4.177	27.28	40	91	0.363	58.2	2.34	69.2	37	0.53	6.941	-1.86553	0.227209	16.51	-1.86989	21.6	1.23	520	1.55	59.8	2.05
Rb	Li	Pr	Br	312.46	961	0.82	403.03	453.69	1615	0.98	520.22	1208	3563	1.13	527.79	1.532	85.4678	-0.961937	0.0908836	88.64	-0.963335	93	2.16	403	2.48	46.89	2.98	55.9	4.177	27.28	40	91	0.363	58.2	2.34	69.2	37	0.53	6.941	-1.86553	0.227209	16.51	-1.86989	21.6	1.23	520	1.55	59.8	2.05
Rb	Li	Y	Br	312.46	961	0.82	403.03	453.69	1615	0.98	520.22	1799	3609	1.22	599.87	1.532	85.4678	-0.961937	0.0908836	88.64	-0.963335	93	2.16	403	2.48	46.89	2.98	55.9	4.177	27.28	40	91	0.363	58.2	2.34	69.2	37	0.53	6.941	-1.86553	0.227209	16.51	-1.86989	21.6	1.23	520	1.55	59.8	2.05
Rb	Li	Y	I	312.46	961	0.82	403.03	453.69	1615	0.98	520.22	1799	3609	1.22	599.87	1.532	85.4678	-0.961937	0.0908836	88.64	-0.963335	93	2.16	403	2.48	46.89	2.98	55.9	4.177	27.28	40	91	0.363	58.2	2.34	69.2	37	0.53	6.941	-1.86553	0.227209	16.51	-1.86989	21.6	1.23	520	1.55	59.8	2.05
Rb	Na	Eu	Cl	312.46	961	0.82	403.03	370.87	1156	0.93	495.85	1099	1800	1.19	547.11	1.532	85.4678	-0.961937	0.0908836	88.64	-0.963335	93	2.16	403	2.48	46.89	2.98	55.9	4.177	27.28	40	91	0.363	58.2	2.34	69.2	37	0.97	22.9898	-1.25448	1.31525	29.21	-1.26024	39.7	1.54	495.8	1.9	52.7	2.23
Rb	Na	Pr	Br	312.46	961	0.82	403.03	370.87	1156	0.93	495.85	1208	3563	1.13	527.79	1.532	85.4678	-0.961937	0.0908836	88.64	-0.963335	93	2.16	403	2.48	46.89	2.98	55.9	4.177	27.28	40	91	0.363	58.2	2.34	69.2	37	0.97	22.9898	-1.25448	1.31525	29.21	-1.26024	39.7	1.54	495.8	1.9	52.7	2.23
Rb	Na	Sb	I	312.46	961	0.82	403.03	370.87	1156	0.93	495.85	903.78	1860	2.05	830.58	1.532	85.4678	-0.961937	0.0908836	88.64	-0.963335	93	2.16	403	2.48	46.89	2.98	55.9	4.177	27.28	40	91	0.363	58.2	2.34	69.2	37	0.97	22.9898	-1.25448	1.31525	29.21	-1.26024	39.7	1.54	495.8	1.9	52.7	2.23
Rb	Na	Y	Br	312.46	961	0.82	403.03	370.87	1156	0.93	495.85	1799	3609	1.22	599.87	1.532	85.4678	-0.961937	0.0908836	88.64	-0.963335	93	2.16	403	2.48	46.89	2.98	55.9	4.177	27.28	40	91	0.363	58.2	2.34	69.2	37	0.97	22.9898	-1.25448	1.31525	29.21	-1.26024	39.7	1.54	495.8	1.9	52.7	2.23
Rb	K	In	Cl	312.46	961	0.82	403.03	336.53	1032	0.82	418.81	429.75	2345	1.78	558.3	1.532	85.4678	-0.961937	0.0908836	88.64	-0.963335	93	2.16	403	2.48	46.89	2.98	55.9	4.177	27.28	40	91	0.363	58.2	2.34	69.2	37	0.86	39.0983	-1.09652	-0.0540791	72.1	-1.09754	75.6	2.03	418.8	2.35	48.36	2.77
K	Rb	Tm	Cl	336.53	1032	0.82	418.81	312.46	961	0.82	403.03	1818	2223	1.25	596.7	0.86	39.0983	-1.09652	-0.0540791	72.1	-1.09754	75.6	2.03	418.8	2.35	48.36	2.77	45.46	4.341	31.625	45.72	82	0.757	102.5	2.33	76.9	19	1.532	85.4678	-0.961937	0.0908836	88.64	-0.963335	93	2.16	403	2.48	46.89	2.98
K	Na	Y	Cl	336.53	1032	0.82	418.81	370.87	1156	0.93	495.85	1799	3609	1.22	599.87	0.86	39.0983	-1.09652	-0.0540791	72.1	-1.09754	75.6	2.03	418.8	2.35	48.36	2.77	45.46	4.341	31.625	45.72	82	0.757	102.5	2.33	76.9	19	0.97	22.9898	-1.25448	1.31525	29.21	-1.26024	39.7	1.54	495.8	1.9	52.7	2.23
K	Na	Ce	Cl	336.53	1032	0.82	418.81	370.87	1156	0.93	495.85	1068	3633	1.12	534.39	0.86	39.0983	-1.09652	-0.0540791	72.1	-1.09754	75.6	2.03	418.8	2.35	48.36	2.77	45.46	4.341	31.625	45.72	82	0.757	102.5	2.33	76.9	19	0.97	22.9898	-1.25448	1.31525	29.21	-1.26024	39.7	1.54	495.8	1.9	52.7	2.23
K	Rb	Sc	Br	336.53	1032	0.82	418.81	312.46	961	0.82	403.03	1814	3103	1.36	633.09	0.86	39.0983	-1.09652	-0.0540791	72.1	-1.09754	75.6	2.03	418.8	2.35	48.36	2.77	45.46	4.341	31.625	45.72	82	0.757	102.5	2.33	76.9	19	1.532	85.4678	-0.961937	0.0908836	88.64	-0.963335	93	2.16	403	2.48	46.89	2.98
K	Cu	Bi	I	336.53	1032	0.82	418.81	1357.77	3200	1.9	745.48	544.4	1837	2.02	702.95	0.86	39.0983	-1.09652	-0.0540791	72.1	-1.09754	75.6	2.03	418.8	2.35	48.36	2.77	45.46	4.341	31.625	45.72	82	0.757	102.5	2.33	76.9	19	8.96	63.456	-3.64289	4.37874	11.08	-3.68065	11.8	1.17	745.4	1.278	118.3	1.57
K	Cu	Bi	Cl	336.53	1032	0.82	418.81	1357.77	3200	1.9	745.48	544.4	1837	2.02	702.95	0.86	39.0983	-1.09652	-0.0540791	72.1	-1.09754	75.6	2.03	418.8	2.35	48.36	2.77	45.46	4.341	31.625	45.72	82	0.757	102.5	2.33	76.9	19	8.96	63.456	-3.64289	4.37874	11.08	-3.68065	11.8	1.17	745.4	1.278	118.3	1.57
Na	Li	Bi	Cl	370.87	1156	0.93	495.85	453.69	1615	0.98	520.22	544.4	1837	2.02	702.95	0.97	22.9898	-1.25448	1.31525	29.21	-1.26024	39.7	1.54	495.8	1.9	52.7	2.23	23.7	5.139	47.286	71.641	71	1.23	141	2.601	98.01	11	0.53	6.941	-1.86553	0.227209	16.51	-1.86989	21.6	1.23	520	1.55	59.8	2.05
Na	Li	Er	Cl	370.87	1156	0.93	495.85	453.69	1615	0.98	520.22	1802	3141	1.24	589.3	0.97	22.9898	-1.25448	1.31525	29.21	-1.26024	39.7	1.54	495.8	1.9	52.7	2.23	23.7	5.139	47.286	71.641	71	1.23	141	2.601	98.01	11	0.53	6.941	-1.86553	0.227209	16.51	-1.86989	21.6	1.23	520	1.55	59.8	2.05
Rb	Li	Mo	Br	312.46	961	0.82	403.03	453.69	1615	0.98	520.22	2896	4912	2.16	684.32	1.532	85.4678	-0.961937	0.0908836	88.64	-0.963335	93	2.16	403	2.48	46.89	2.98	55.9	4.177	27.28	40	91	0.363	58.2	2.34	69.2	37	0.53	6.941	-1.86553	0.227209	16.51	-1.86989	21.6	1.23	520	1.55	59.8	2.05
Rb	Na	Dy	Cl	312.46	961	0.82	403.03	370.87	1156	0.93	495.85	1680	2840	1.22	573.03	1.532	85.4678	-0.961937	0.0908836	88.64	-0.963335	93	2.16	403	2.48	46.89	2.98	55.9	4.177	27.28	40	91	0.363	58.2	2.34	69.2	37	0.97	22.9898	-1.25448	1.31525	29.21	-1.26024	39.7	1.54	495.8	1.9	52.7	2.23
Rb	Na	Mo	I	312.46	961	0.82	403.03	370.87	1156	0.93	495.85	2896	4912	2.16	684.32	1.532	85.4678	-0.961937	0.0908836	88.64	-0.963335	93	2.16	403	2.48	46.89	2.98	55.9	4.177	27.28	40	91	0.363	58.2	2.34	69.2	37	0.97	22.9898	-1.25448	1.31525	29.21	-1.26024	39.7	1.54	495.8	1.9	52.7	2.23
Rb	Na	Nd	I	312.46	961	0.82	403.03	370.87	1156	0.93	495.85	1297	3373	1.14	533.08	1.532	85.4678	-0.961937	0.0908836	88.64	-0.963335	93	2.16	403	2.48	46.89	2.98	55.9	4.177	27.28	40	91	0.363	58.2	2.34	69.2	37	0.97	22.9898	-1.25448	1.31525	29.21	-1.26024	39.7	1.54	495.8	1.9	52.7	2.23
K	Rb	Pr	I	336.53	1032	0.82	418.81	312.46	961	0.82	403.03	1208	3563	1.13	527.79	0.86	39.0983	-1.09652	-0.0540791	72.1	-1.09754	75.6	2.03	418.8	2.35	48.36	2.77	45.46	4.341	31.625	45.72	82	0.757	102.5	2.33	76.9	19	1.532	85.4678	-0.961937	0.0908836	88.64	-0.963335	93	2.16	403	2.48	46.89	2.98
Rb	K	Lu	Cl	312.46	961	0.82	403.03	336.53	1032	0.82	418.81	1925	3675	1.27	523.52	1.532	85.4678	-0.961937	0.0908836	88.64	-0.963335	93	2.16	403	2.48	46.89	2.98	55.9	4.177	27.28	40	91	0.363	58.2	2.34	69.2	37	0.86	39.0983	-1.09652	-0.0540791	72.1	-1.09754	75.6	2.03	418.8	2.35	48.36	2.77
Rb	Li	Pr	I	312.46	961	0.82	403.03	453.69	1615	0.98	520.22	1208	3563	1.13	527.79	1.532	85.4678	-0.961937	0.0908836	88.64	-0.963335	93	2.16	403	2.48	46.89	2.98	55.9	4.177	27.28	40	91	0.363	58.2	2.34	69.2	37	0.53	6.941	-1.86553	0.227209	16.51	-1.86989	21.6	1.23	520	1.55	59.8	2.05
Rb	Na	Nd	Br	312.46	961	0.82	403.03	370.87	1156	0.93	495.85	1297	3373	1.14	533.08	1.532	85.4678	-0.961937	0.0908836	88.64	-0.963335	93	2.16	403	2.48	46.89	2.98	55.9	4.177	27.28	40	91	0.363	58.2	2.34	69.2	37	0.97	22.9898	-1.25448	1.31525	29.21	-1.26024	39.7	1.54	495.8	1.9	52.7	2.23
Rb	Na	Y	Cl	312.46	961	0.82	403.03	370.87	1156	0.93	495.85	1799	3609	1.22	599.87	1.532	85.4678	-0.961937	0.0908836	88.64	-0.963335	93	2.16	403	2.48	46.89	2.98	55.9	4.177	27.28	40	91	0.363	58.2	2.34	69.2	37	0.97	22.9898	-1.25448	1.31525	29.21	-1.26024	39.7	1.54	495.8	1.9	52.7	2.23
Rb	Li	Ho	Cl	312.46	961	0.82	403.03	453.69	1615	0.98	520.22	1734	2993	1.23	580.99	1.532	85.4678	-0.961937	0.0908836	88.64	-0.963335	93	2.16	403	2.48	46.89	2.98	55.9	4.177	27.28	40	91	0.363	58.2	2.34	69.2	37	0.53	6.941	-1.86553	0.227209	16.51	-1.86989	21.6	1.23	520	1.55	59.8	2.05
Rb	Na	V	Cl	312.46	961	0.82	403.03	370.87	1156	0.93	495.85	2183	3680	1.63	650.91	1.532	85.4678	-0.961937	0.0908836	88.64	-0.963335	93	2.16	403	2.48	46.89	2.98	55.9	4.177	27.28	40	91	0.363	58.2	2.34	69.2	37	0.97	22.9898	-1.25448	1.31525	29.21	-1.26024	39.7	1.54	495.8	1.9	52.7	2.23
K	Rb	Y	Cl	336.53	1032	0.82	418.81	312.46	961	0.82	403.03	1799	3609	1.22	599.87	0.86	39.0983	-1.09652	-0.0540791	72.1	-1.09754	75.6	2.03	418.8	2.35	48.36	2.77	45.46	4.341	31.625	45.72	82	0.757	102.5	2.33	76.9	19	1.532	85.4678	-0.961937	0.0908836	88.64	-0.963335	93	2.16	403	2.48	46.89	2.98
K	Rb	Sb	Cl	336.53	1032	0.82	418.81	312.46	961	0.82	403.03	903.78	1860	2.05	830.58	0.86	39.0983	-1.09652	-0.0540791	72.1	-1.09754	75.6	2.03	418.8	2.35	48.36	2.77	45.46	4.341	31.625	45.72	82	0.757	102.5	2.33	76.9	19	1.532	85.4678	-0.961937	0.0908836	88.64	-0.963335	93	2.16	403	2.48	46.89	2.98
K	Na	Y	I	336.53	1032	0.82	418.81	370.87	1156	0.93	495.85	1799	3609	1.22	599.87	0.86	39.0983	-1.09652	-0.0540791	72.1	-1.09754	75.6	2.03	418.8	2.35	48.36	2.77	45.46	4.341	31.625	45.72	82	0.757	102.5	2.33	76.9	19	0.97	22.9898	-1.25448	1.31525	29.21	-1.26024	39.7	1.54	495.8	1.9	52.7	2.23
K	Na	Bi	Br	336.53	1032	0.82	418.81	370.87	1156	0.93	495.85	544.4	1837	2.02	702.95	0.86	39.0983	-1.09652	-0.0540791	72.1	-1.09754	75.6	2.03	418.8	2.35	48.36	2.77	45.46	4.341	31.625	45.72	82	0.757	102.5	2.33	76.9	19	0.97	22.9898	-1.25448	1.31525	29.21	-1.26024	39.7	1.54	495.8	1.9	52.7	2.23
K	Li	Pr	Br	336.53	1032	0.82	418.81	453.69	1615	0.98	520.22	1208	3563	1.13	527.79	0.86	39.0983	-1.09652	-0.0540791	72.1	-1.09754	75.6	2.03	418.8	2.35	48.36	2.77	45.46	4.341	31.625	45.72	82	0.757	102.5	2.33	76.9	19	0.53	6.941	-1.86553	0.227209	16.51	-1.86989	21.6	1.23	520	1.55	59.8	2.05
K	Li	Pr	I	336.53	1032	0.82	418.81	453.69	1615	0.98	520.22	1208	3563	1.13	527.79	0.86	39.0983	-1.09652	-0.0540791	72.1	-1.09754	75.6	2.03	418.8	2.35	48.36	2.77	45.46	4.341	31.625	45.72	82	0.757	102.5	2.33	76.9	19	0.53	6.941	-1.86553	0.227209	16.51	-1.86989	21.6	1.23	520	1.55	59.8	2.05
K	Li	Bi	I	336.53	1032	0.82	418.81	453.69	1615	0.98	520.22	544.4	1837	2.02	702.95	0.86	39.0983	-1.09652	-0.0540791	72.1	-1.09754	75.6	2.03	418.8	2.35	48.36	2.77	45.46	4.341	31.625	45.72	82	0.757	102.5	2.33	76.9	19	0.53	6.941	-1.86553	0.227209	16.51	-1.86989	21.6	1.23	520	1.55	59.8	2.05
K	Rb	Al	Cl	336.53	1032	0.82	418.81	312.46	961	0.82	403.03	933.47	2792	1.61	577.54	0.86	39.0983	-1.09652	-0.0540791	72.1	-1.09754	75.6	2.03	418.8	2.35	48.36	2.77	45.46	4.341	31.625	45.72	82	0.757	102.5	2.33	76.9	19	1.532	85.4678	-0.961937	0.0908836	88.64	-0.963335	93	2.16	403	2.48	46.89	2.98
K	Na	Nd	I	336.53	1032	0.82	418.81	370.87	1156	0.93	495.85	1297	3373	1.14	533.08	0.86	39.0983	-1.09652	-0.0540791	72.1	-1.09754	75.6	2.03	418.8	2.35	48.36	2.77	45.46	4.341	31.625	45.72	82	0.757	102.5	2.33	76.9	19	0.97	22.9898	-1.25448	1.31525	29.21	-1.26024	39.7	1.54	495.8	1.9	52.7	2.23
K	Na	Eu	Cl	336.53	1032	0.82	418.81	370.87	1156	0.93	495.85	1099	1800	1.19	547.11	0.86	39.0983	-1.09652	-0.0540791	72.1	-1.09754	75.6	2.03	418.8	2.35	48.36	2.77	45.46	4.341	31.625	45.72	82	0.757	102.5	2.33	76.9	19	0.97	22.9898	-1.25448	1.31525	29.21	-1.26024	39.7	1.54	495.8	1.9	52.7	2.23
K	Na	Er	Cl	336.53	1032	0.82	418.81	370.87	1156	0.93	495.85	1802	3141	1.24	589.3	0.86	39.0983	-1.09652	-0.0540791	72.1	-1.09754	75.6	2.03	418.8	2.35	48.36	2.77	45.46	4.341	31.625	45.72	82	0.757	102.5	2.33	76.9	19	0.97	22.9898	-1.25448	1.31525	29.21	-1.26024	39.7	1.54	495.8	1.9	52.7	2.23
K	Li	Sb	Cl	336.53	1032	0.82	418.81	453.69	1615	0.98	520.22	903.78	1860	2.05	830.58	0.86	39.0983	-1.09652	-0.0540791	72.1	-1.09754	75.6	2.03	418.8	2.35	48.36	2.77	45.46	4.341	31.625	45.72	82	0.757	102.5	2.33	76.9	19	0.53	6.941	-1.86553	0.227209	16.51	-1.86989	21.6	1.23	520	1.55	59.8	2.05
K	Li	Ce	I	336.53	1032	0.82	418.81	453.69	1615	0.98	520.22	1068	3633	1.12	534.39	0.86	39.0983	-1.09652	-0.0540791	72.1	-1.09754	75.6	2.03	418.8	2.35	48.36	2.77	45.46	4.341	31.625	45.72	82	0.757	102.5	2.33	76.9	19	0.53	6.941	-1.86553	0.227209	16.51	-1.86989	21.6	1.23	520	1.55	59.8	2.05
K	Li	Ce	Cl	336.53	1032	0.82	418.81	453.69	1615	0.98	520.22	1068	3633	1.12	534.39	0.86	39.0983	-1.09652	-0.0540791	72.1	-1.09754	75.6	2.03	418.8	2.35	48.36	2.77	45.46	4.341	31.625	45.72	82	0.757	102.5	2.33	76.9	19	0.53	6.941	-1.86553	0.227209	16.51	-1.86989	21.6	1.23	520	1.55	59.8	2.05
K	Na	Mo	Cl	336.53	1032	0.82	418.81	370.87	1156	0.93	495.85	2896	4912	2.16	684.32	0.86	39.0983	-1.09652	-0.0540791	72.1	-1.09754	75.6	2.03	418.8	2.35	48.36	2.77	45.46	4.341	31.625	45.72	82	0.757	102.5	2.33	76.9	19	0.97	22.9898	-1.25448	1.31525	29.21	-1.26024	39.7	1.54	495.8	1.9	52.7	2.23
K	Ag	Mo	I	336.53	1032	0.82	418.81	1234.93	2435	1.93	731	2896	4912	2.16	684.32	0.86	39.0983	-1.09652	-0.0540791	72.1	-1.09754	75.6	2.03	418.8	2.35	48.36	2.77	45.46	4.341	31.625	45.72	82	0.757	102.5	2.33	76.9	19	10.5	107.868	-2.71998	4.05276	16.2	-2.76539	17	1.34	731	1.444	125.7	1.75
K	Ag	Mo	Br	336.53	1032	0.82	418.81	1234.93	2435	1.93	731	2896	4912	2.16	684.32	0.86	39.0983	-1.09652	-0.0540791	72.1	-1.09754	75.6	2.03	418.8	2.35	48.36	2.77	45.46	4.341	31.625	45.72	82	0.757	102.5	2.33	76.9	19	10.5	107.868	-2.71998	4.05276	16.2	-2.76539	17	1.34	731	1.444	125.7	1.75
Na	Li	Tm	Cl	370.87	1156	0.93	495.85	453.69	1615	0.98	520.22	1818	2223	1.25	596.7	0.97	22.9898	-1.25448	1.31525	29.21	-1.26024	39.7	1.54	495.8	1.9	52.7	2.23	23.7	5.139	47.286	71.641	71	1.23	141	2.601	98.01	11	0.53	6.941	-1.86553	0.227209	16.51	-1.86989	21.6	1.23	520	1.55	59.8	2.05
Na	Li	Gd	Cl	370.87	1156	0.93	495.85	453.69	1615	0.98	520.22	1585	3523	1.2	593.37	0.97	22.9898	-1.25448	1.31525	29.21	-1.26024	39.7	1.54	495.8	1.9	52.7	2.23	23.7	5.139	47.286	71.641	71	1.23	141	2.601	98.01	11	0.53	6.941	-1.86553	0.227209	16.51	-1.86989	21.6	1.23	520	1.55	59.8	2.05
K	Rb	Mo	Br	336.53	1032	0.82	418.81	312.46	961	0.82	403.03	2896	4912	2.16	684.32	0.86	39.0983	-1.09652	-0.0540791	72.1	-1.09754	75.6	2.03	418.8	2.35	48.36	2.77	45.46	4.341	31.625	45.72	82	0.757	102.5	2.33	76.9	19	1.532	85.4678	-0.961937	0.0908836	88.64	-0.963335	93	2.16	403	2.48	46.89	2.98
K	Rb	Pr	Cl	336.53	1032	0.82	418.81	312.46	961	0.82	403.03	1208	3563	1.13	527.79	0.86	39.0983	-1.09652	-0.0540791	72.1	-1.09754	75.6	2.03	418.8	2.35	48.36	2.77	45.46	4.341	31.625	45.72	82	0.757	102.5	2.33	76.9	19	1.532	85.4678	-0.961937	0.0908836	88.64	-0.963335	93	2.16	403	2.48	46.89	2.98
K	Rb	Y	I	336.53	1032	0.82	418.81	312.46	961	0.82	403.03	1799	3609	1.22	599.87	0.86	39.0983	-1.09652	-0.0540791	72.1	-1.09754	75.6	2.03	418.8	2.35	48.36	2.77	45.46	4.341	31.625	45.72	82	0.757	102.5	2.33	76.9	19	1.532	85.4678	-0.961937	0.0908836	88.64	-0.963335	93	2.16	403	2.48	46.89	2.98
Rb	Li	Bi	Br	312.46	961	0.82	403.03	453.69	1615	0.98	520.22	544.4	1837	2.02	702.95	1.532	85.4678	-0.961937	0.0908836	88.64	-0.963335	93	2.16	403	2.48	46.89	2.98	55.9	4.177	27.28	40	91	0.363	58.2	2.34	69.2	37	0.53	6.941	-1.86553	0.227209	16.51	-1.86989	21.6	1.23	520	1.55	59.8	2.05
Rb	Li	Bi	I	312.46	961	0.82	403.03	453.69	1615	0.98	520.22	544.4	1837	2.02	702.95	1.532	85.4678	-0.961937	0.0908836	88.64	-0.963335	93	2.16	403	2.48	46.89	2.98	55.9	4.177	27.28	40	91	0.363	58.2	2.34	69.2	37	0.53	6.941	-1.86553	0.227209	16.51	-1.86989	21.6	1.23	520	1.55	59.8	2.05
Rb	Li	Nd	Br	312.46	961	0.82	403.03	453.69	1615	0.98	520.22	1297	3373	1.14	533.08	1.532	85.4678	-0.961937	0.0908836	88.64	-0.963335	93	2.16	403	2.48	46.89	2.98	55.9	4.177	27.28	40	91	0.363	58.2	2.34	69.2	37	0.53	6.941	-1.86553	0.227209	16.51	-1.86989	21.6	1.23	520	1.55	59.8	2.05
Rb	Na	Bi	Br	312.46	961	0.82	403.03	370.87	1156	0.93	495.85	544.4	1837	2.02	702.95	1.532	85.4678	-0.961937	0.0908836	88.64	-0.963335	93	2.16	403	2.48	46.89	2.98	55.9	4.177	27.28	40	91	0.363	58.2	2.34	69.2	37	0.97	22.9898	-1.25448	1.31525	29.21	-1.26024	39.7	1.54	495.8	1.9	52.7	2.23
Rb	Na	Ce	Br	312.46	961	0.82	403.03	370.87	1156	0.93	495.85	1068	3633	1.12	534.39	1.532	85.4678	-0.961937	0.0908836	88.64	-0.963335	93	2.16	403	2.48	46.89	2.98	55.9	4.177	27.28	40	91	0.363	58.2	2.34	69.2	37	0.97	22.9898	-1.25448	1.31525	29.21	-1.26024	39.7	1.54	495.8	1.9	52.7	2.23
Rb	Na	Nd	Cl	312.46	961	0.82	403.03	370.87	1156	0.93	495.85	1297	3373	1.14	533.08	1.532	85.4678	-0.961937	0.0908836	88.64	-0.963335	93	2.16	403	2.48	46.89	2.98	55.9	4.177	27.28	40	91	0.363	58.2	2.34	69.2	37	0.97	22.9898	-1.25448	1.31525	29.21	-1.26024	39.7	1.54	495.8	1.9	52.7	2.23
Rb	Na	Sm	Cl	312.46	961	0.82	403.03	370.87	1156	0.93	495.85	1345	2076	1.17	544.54	1.532	85.4678	-0.961937	0.0908836	88.64	-0.963335	93	2.16	403	2.48	46.89	2.98	55.9	4.177	27.28	40	91	0.363	58.2	2.34	69.2	37	0.97	22.9898	-1.25448	1.31525	29.21	-1.26024	39.7	1.54	495.8	1.9	52.7	2.23
Rb	K	Al	Br	312.46	961	0.82	403.03	336.53	1032	0.82	418.81	933.47	2792	1.61	577.54	1.532	85.4678	-0.961937	0.0908836	88.64	-0.963335	93	2.16	403	2.48	46.89	2.98	55.9	4.177	27.28	40	91	0.363	58.2	2.34	69.2	37	0.86	39.0983	-1.09652	-0.0540791	72.1	-1.09754	75.6	2.03	418.8	2.35	48.36	2.77
Rb	K	Al	Cl	312.46	961	0.82	403.03	336.53	1032	0.82	418.81	933.47	2792	1.61	577.54	1.532	85.4678	-0.961937	0.0908836	88.64	-0.963335	93	2.16	403	2.48	46.89	2.98	55.9	4.177	27.28	40	91	0.363	58.2	2.34	69.2	37	0.86	39.0983	-1.09652	-0.0540791	72.1	-1.09754	75.6	2.03	418.8	2.35	48.36	2.77
K	Na	La	Cl	336.53	1032	0.82	418.81	370.87	1156	0.93	495.85	1193	3743	1.1	538.09	0.86	39.0983	-1.09652	-0.0540791	72.1	-1.09754	75.6	2.03	418.8	2.35	48.36	2.77	45.46	4.341	31.625	45.72	82	0.757	102.5	2.33	76.9	19	0.97	22.9898	-1.25448	1.31525	29.21	-1.26024	39.7	1.54	495.8	1.9	52.7	2.23
K	Rb	Sb	Br	336.53	1032	0.82	418.81	312.46	961	0.82	403.03	903.78	1860	2.05	830.58	0.86	39.0983	-1.09652	-0.0540791	72.1	-1.09754	75.6	2.03	418.8	2.35	48.36	2.77	45.46	4.341	31.625	45.72	82	0.757	102.5	2.33	76.9	19	1.532	85.4678	-0.961937	0.0908836	88.64	-0.963335	93	2.16	403	2.48	46.89	2.98
K	Rb	Gd	Cl	336.53	1032	0.82	418.81	312.46	961	0.82	403.03	1585	3523	1.2	593.37	0.86	39.0983	-1.09652	-0.0540791	72.1	-1.09754	75.6	2.03	418.8	2.35	48.36	2.77	45.46	4.341	31.625	45.72	82	0.757	102.5	2.33	76.9	19	1.532	85.4678	-0.961937	0.0908836	88.64	-0.963335	93	2.16	403	2.48	46.89	2.98
K	Na	Ce	I	336.53	1032	0.82	418.81	370.87	1156	0.93	495.85	1068	3633	1.12	534.39	0.86	39.0983	-1.09652	-0.0540791	72.1	-1.09754	75.6	2.03	418.8	2.35	48.36	2.77	45.46	4.341	31.625	45.72	82	0.757	102.5	2.33	76.9	19	0.97	22.9898	-1.25448	1.31525	29.21	-1.26024	39.7	1.54	495.8	1.9	52.7	2.23
K	Na	Bi	I	336.53	1032	0.82	418.81	370.87	1156	0.93	495.85	544.4	1837	2.02	702.95	0.86	39.0983	-1.09652	-0.0540791	72.1	-1.09754	75.6	2.03	418.8	2.35	48.36	2.77	45.46	4.341	31.625	45.72	82	0.757	102.5	2.33	76.9	19	0.97	22.9898	-1.25448	1.31525	29.21	-1.26024	39.7	1.54	495.8	1.9	52.7	2.23
K	Na	Bi	Cl	336.53	1032	0.82	418.81	370.87	1156	0.93	495.85	544.4	1837	2.02	702.95	0.86	39.0983	-1.09652	-0.0540791	72.1	-1.09754	75.6	2.03	418.8	2.35	48.36	2.77	45.46	4.341	31.625	45.72	82	0.757	102.5	2.33	76.9	19	0.97	22.9898	-1.25448	1.31525	29.21	-1.26024	39.7	1.54	495.8	1.9	52.7	2.23
K	Li	Nd	I	336.53	1032	0.82	418.81	453.69	1615	0.98	520.22	1297	3373	1.14	533.08	0.86	39.0983	-1.09652	-0.0540791	72.1	-1.09754	75.6	2.03	418.8	2.35	48.36	2.77	45.46	4.341	31.625	45.72	82	0.757	102.5	2.33	76.9	19	0.53	6.941	-1.86553	0.227209	16.51	-1.86989	21.6	1.23	520	1.55	59.8	2.05
K	Li	La	Cl	336.53	1032	0.82	418.81	453.69	1615	0.98	520.22	1193	3743	1.1	538.09	0.86	39.0983	-1.09652	-0.0540791	72.1	-1.09754	75.6	2.03	418.8	2.35	48.36	2.77	45.46	4.341	31.625	45.72	82	0.757	102.5	2.33	76.9	19	0.53	6.941	-1.86553	0.227209	16.51	-1.86989	21.6	1.23	520	1.55	59.8	2.05
K	Li	Dy	Cl	336.53	1032	0.82	418.81	453.69	1615	0.98	520.22	1680	2840	1.22	573.03	0.86	39.0983	-1.09652	-0.0540791	72.1	-1.09754	75.6	2.03	418.8	2.35	48.36	2.77	45.46	4.341	31.625	45.72	82	0.757	102.5	2.33	76.9	19	0.53	6.941	-1.86553	0.227209	16.51	-1.86989	21.6	1.23	520	1.55	59.8	2.05
K	Rb	Al	I	336.53	1032	0.82	418.81	312.46	961	0.82	403.03	933.47	2792	1.61	577.54	0.86	39.0983	-1.09652	-0.0540791	72.1	-1.09754	75.6	2.03	418.8	2.35	48.36	2.77	45.46	4.341	31.625	45.72	82	0.757	102.5	2.33	76.9	19	1.532	85.4678	-0.961937	0.0908836	88.64	-0.963335	93	2.16	403	2.48	46.89	2.98
K	Rb	Al	Br	336.53	1032	0.82	418.81	312.46	961	0.82	403.03	933.47	2792	1.61	577.54	0.86	39.0983	-1.09652	-0.0540791	72.1	-1.09754	75.6	2.03	418.8	2.35	48.36	2.77	45.46	4.341	31.625	45.72	82	0.757	102.5	2.33	76.9	19	1.532	85.4678	-0.961937	0.0908836	88.64	-0.963335	93	2.16	403	2.48	46.89	2.98
K	Na	In	Br	336.53	1032	0.82	418.81	370.87	1156	0.93	495.85	429.75	2345	1.78	558.3	0.86	39.0983	-1.09652	-0.0540791	72.1	-1.09754	75.6	2.03	418.8	2.35	48.36	2.77	45.46	4.341	31.625	45.72	82	0.757	102.5	2.33	76.9	19	0.97	22.9898	-1.25448	1.31525	29.21	-1.26024	39.7	1.54	495.8	1.9	52.7	2.23
K	Na	Ga	Br	336.53	1032	0.82	418.81	370.87	1156	0.93	495.85	302.91	2477	1.81	578.84	0.86	39.0983	-1.09652	-0.0540791	72.1	-1.09754	75.6	2.03	418.8	2.35	48.36	2.77	45.46	4.341	31.625	45.72	82	0.757	102.5	2.33	76.9	19	0.97	22.9898	-1.25448	1.31525	29.21	-1.26024	39.7	1.54	495.8	1.9	52.7	2.23
K	Li	Y	Br	336.53	1032	0.82	418.81	453.69	1615	0.98	520.22	1799	3609	1.22	599.87	0.86	39.0983	-1.09652	-0.0540791	72.1	-1.09754	75.6	2.03	418.8	2.35	48.36	2.77	45.46	4.341	31.625	45.72	82	0.757	102.5	2.33	76.9	19	0.53	6.941	-1.86553	0.227209	16.51	-1.86989	21.6	1.23	520	1.55	59.8	2.05
Rb	Cu	Mo	I	312.46	961	0.82	403.03	1357.77	3200	1.9	745.48	2896	4912	2.16	684.32	1.532	85.4678	-0.961937	0.0908836	88.64	-0.963335	93	2.16	403	2.48	46.89	2.98	55.9	4.177	27.28	40	91	0.363	58.2	2.34	69.2	37	8.96	63.456	-3.64289	4.37874	11.08	-3.68065	11.8	1.17	745.4	1.278	118.3	1.57
K	Ag	Bi	Br	336.53	1032	0.82	418.81	1234.93	2435	1.93	731	544.4	1837	2.02	702.95	0.86	39.0983	-1.09652	-0.0540791	72.1	-1.09754	75.6	2.03	418.8	2.35	48.36	2.77	45.46	4.341	31.625	45.72	82	0.757	102.5	2.33	76.9	19	10.5	107.868	-2.71998	4.05276	16.2	-2.76539	17	1.34	731	1.444	125.7	1.75
Rb	Cu	Mo	Cl	312.46	961	0.82	403.03	1357.77	3200	1.9	745.48	2896	4912	2.16	684.32	1.532	85.4678	-0.961937	0.0908836	88.64	-0.963335	93	2.16	403	2.48	46.89	2.98	55.9	4.177	27.28	40	91	0.363	58.2	2.34	69.2	37	8.96	63.456	-3.64289	4.37874	11.08	-3.68065	11.8	1.17	745.4	1.278	118.3	1.57
Na	Cu	Sb	Cl	370.87	1156	0.93	495.85	1357.77	3200	1.9	745.48	903.78	1860	2.05	830.58	0.97	22.9898	-1.25448	1.31525	29.21	-1.26024	39.7	1.54	495.8	1.9	52.7	2.23	23.7	5.139	47.286	71.641	71	1.23	141	2.601	98.01	11	8.96	63.456	-3.64289	4.37874	11.08	-3.68065	11.8	1.17	745.4	1.278	118.3	1.57
Na	Li	Sb	Cl	370.87	1156	0.93	495.85	453.69	1615	0.98	520.22	903.78	1860	2.05	830.58	0.97	22.9898	-1.25448	1.31525	29.21	-1.26024	39.7	1.54	495.8	1.9	52.7	2.23	23.7	5.139	47.286	71.641	71	1.23	141	2.601	98.01	11	0.53	6.941	-1.86553	0.227209	16.51	-1.86989	21.6	1.23	520	1.55	59.8	2.05
Na	Li	Bi	I	370.87	1156	0.93	495.85	453.69	1615	0.98	520.22	544.4	1837	2.02	702.95	0.97	22.9898	-1.25448	1.31525	29.21	-1.26024	39.7	1.54	495.8	1.9	52.7	2.23	23.7	5.139	47.286	71.641	71	1.23	141	2.601	98.01	11	0.53	6.941	-1.86553	0.227209	16.51	-1.86989	21.6	1.23	520	1.55	59.8	2.05
Na	Li	La	Cl	370.87	1156	0.93	495.85	453.69	1615	0.98	520.22	1193	3743	1.1	538.09	0.97	22.9898	-1.25448	1.31525	29.21	-1.26024	39.7	1.54	495.8	1.9	52.7	2.23	23.7	5.139	47.286	71.641	71	1.23	141	2.601	98.01	11	0.53	6.941	-1.86553	0.227209	16.51	-1.86989	21.6	1.23	520	1.55	59.8	2.05
Na	Li	Eu	Cl	370.87	1156	0.93	495.85	453.69	1615	0.98	520.22	1099	1800	1.19	547.11	0.97	22.9898	-1.25448	1.31525	29.21	-1.26024	39.7	1.54	495.8	1.9	52.7	2.23	23.7	5.139	47.286	71.641	71	1.23	141	2.601	98.01	11	0.53	6.941	-1.86553	0.227209	16.51	-1.86989	21.6	1.23	520	1.55	59.8	2.05
Rb	Li	Gd	Cl	312.46	961	0.82	403.03	453.69	1615	0.98	520.22	1585	3523	1.2	593.37	1.532	85.4678	-0.961937	0.0908836	88.64	-0.963335	93	2.16	403	2.48	46.89	2.98	55.9	4.177	27.28	40	91	0.363	58.2	2.34	69.2	37	0.53	6.941	-1.86553	0.227209	16.51	-1.86989	21.6	1.23	520	1.55	59.8	2.05
Rb	Li	Lu	Cl	312.46	961	0.82	403.03	453.69	1615	0.98	520.22	1925	3675	1.27	523.52	1.532	85.4678	-0.961937	0.0908836	88.64	-0.963335	93	2.16	403	2.48	46.89	2.98	55.9	4.177	27.28	40	91	0.363	58.2	2.34	69.2	37	0.53	6.941	-1.86553	0.227209	16.51	-1.86989	21.6	1.23	520	1.55	59.8	2.05
Rb	Li	Sb	Cl	312.46	961	0.82	403.03	453.69	1615	0.98	520.22	903.78	1860	2.05	830.58	1.532	85.4678	-0.961937	0.0908836	88.64	-0.963335	93	2.16	403	2.48	46.89	2.98	55.9	4.177	27.28	40	91	0.363	58.2	2.34	69.2	37	0.53	6.941	-1.86553	0.227209	16.51	-1.86989	21.6	1.23	520	1.55	59.8	2.05
Rb	Na	Mo	Cl	312.46	961	0.82	403.03	370.87	1156	0.93	495.85	2896	4912	2.16	684.32	1.532	85.4678	-0.961937	0.0908836	88.64	-0.963335	93	2.16	403	2.48	46.89	2.98	55.9	4.177	27.28	40	91	0.363	58.2	2.34	69.2	37	0.97	22.9898	-1.25448	1.31525	29.21	-1.26024	39.7	1.54	495.8	1.9	52.7	2.23
Rb	K	Al	I	312.46	961	0.82	403.03	336.53	1032	0.82	418.81	933.47	2792	1.61	577.54	1.532	85.4678	-0.961937	0.0908836	88.64	-0.963335	93	2.16	403	2.48	46.89	2.98	55.9	4.177	27.28	40	91	0.363	58.2	2.34	69.2	37	0.86	39.0983	-1.09652	-0.0540791	72.1	-1.09754	75.6	2.03	418.8	2.35	48.36	2.77
K	Rb	Ce	Cl	336.53	1032	0.82	418.81	312.46	961	0.82	403.03	1068	3633	1.12	534.39	0.86	39.0983	-1.09652	-0.0540791	72.1	-1.09754	75.6	2.03	418.8	2.35	48.36	2.77	45.46	4.341	31.625	45.72	82	0.757	102.5	2.33	76.9	19	1.532	85.4678	-0.961937	0.0908836	88.64	-0.963335	93	2.16	403	2.48	46.89	2.98
K	Rb	Ce	I	336.53	1032	0.82	418.81	312.46	961	0.82	403.03	1068	3633	1.12	534.39	0.86	39.0983	-1.09652	-0.0540791	72.1	-1.09754	75.6	2.03	418.8	2.35	48.36	2.77	45.46	4.341	31.625	45.72	82	0.757	102.5	2.33	76.9	19	1.532	85.4678	-0.961937	0.0908836	88.64	-0.963335	93	2.16	403	2.48	46.89	2.98
K	Rb	Nd	I	336.53	1032	0.82	418.81	312.46	961	0.82	403.03	1297	3373	1.14	533.08	0.86	39.0983	-1.09652	-0.0540791	72.1	-1.09754	75.6	2.03	418.8	2.35	48.36	2.77	45.46	4.341	31.625	45.72	82	0.757	102.5	2.33	76.9	19	1.532	85.4678	-0.961937	0.0908836	88.64	-0.963335	93	2.16	403	2.48	46.89	2.98
K	Rb	Sb	I	336.53	1032	0.82	418.81	312.46	961	0.82	403.03	903.78	1860	2.05	830.58	0.86	39.0983	-1.09652	-0.0540791	72.1	-1.09754	75.6	2.03	418.8	2.35	48.36	2.77	45.46	4.341	31.625	45.72	82	0.757	102.5	2.33	76.9	19	1.532	85.4678	-0.961937	0.0908836	88.64	-0.963335	93	2.16	403	2.48	46.89	2.98
Rb	Li	Sb	I	312.46	961	0.82	403.03	453.69	1615	0.98	520.22	903.78	1860	2.05	830.58	1.532	85.4678	-0.961937	0.0908836	88.64	-0.963335	93	2.16	403	2.48	46.89	2.98	55.9	4.177	27.28	40	91	0.363	58.2	2.34	69.2	37	0.53	6.941	-1.86553	0.227209	16.51	-1.86989	21.6	1.23	520	1.55	59.8	2.05
Rb	K	Ga	Br	312.46	961	0.82	403.03	336.53	1032	0.82	418.81	302.91	2477	1.81	578.84	1.532	85.4678	-0.961937	0.0908836	88.64	-0.963335	93	2.16	403	2.48	46.89	2.98	55.9	4.177	27.28	40	91	0.363	58.2	2.34	69.2	37	0.86	39.0983	-1.09652	-0.0540791	72.1	-1.09754	75.6	2.03	418.8	2.35	48.36	2.77
Rb	Li	Ce	Br	312.46	961	0.82	403.03	453.69	1615	0.98	520.22	1068	3633	1.12	534.39	1.532	85.4678	-0.961937	0.0908836	88.64	-0.963335	93	2.16	403	2.48	46.89	2.98	55.9	4.177	27.28	40	91	0.363	58.2	2.34	69.2	37	0.53	6.941	-1.86553	0.227209	16.51	-1.86989	21.6	1.23	520	1.55	59.8	2.05
Rb	Na	Cr	Cl	312.46	961	0.82	403.03	370.87	1156	0.93	495.85	2180	2944	1.66	652.87	1.532	85.4678	-0.961937	0.0908836	88.64	-0.963335	93	2.16	403	2.48	46.89	2.98	55.9	4.177	27.28	40	91	0.363	58.2	2.34	69.2	37	0.97	22.9898	-1.25448	1.31525	29.21	-1.26024	39.7	1.54	495.8	1.9	52.7	2.23
Rb	Li	Rh	Cl	312.46	961	0.82	403.03	453.69	1615	0.98	520.22	2237	3968	2.28	719.67	1.532	85.4678	-0.961937	0.0908836	88.64	-0.963335	93	2.16	403	2.48	46.89	2.98	55.9	4.177	27.28	40	91	0.363	58.2	2.34	69.2	37	0.53	6.941	-1.86553	0.227209	16.51	-1.86989	21.6	1.23	520	1.55	59.8	2.05
Rb	Li	Dy	Br	312.46	961	0.82	403.03	453.69	1615	0.98	520.22	1680	2840	1.22	573.03	1.532	85.4678	-0.961937	0.0908836	88.64	-0.963335	93	2.16	403	2.48	46.89	2.98	55.9	4.177	27.28	40	91	0.363	58.2	2.34	69.2	37	0.53	6.941	-1.86553	0.227209	16.51	-1.86989	21.6	1.23	520	1.55	59.8	2.05
K	Na	Sb	Br	336.53	1032	0.82	418.81	370.87	1156	0.93	495.85	903.78	1860	2.05	830.58	0.86	39.0983	-1.09652	-0.0540791	72.1	-1.09754	75.6	2.03	418.8	2.35	48.36	2.77	45.46	4.341	31.625	45.72	82	0.757	102.5	2.33	76.9	19	0.97	22.9898	-1.25448	1.31525	29.21	-1.26024	39.7	1.54	495.8	1.9	52.7	2.23
K	Na	Sb	I	336.53	1032	0.82	418.81	370.87	1156	0.93	495.85	903.78	1860	2.05	830.58	0.86	39.0983	-1.09652	-0.0540791	72.1	-1.09754	75.6	2.03	418.8	2.35	48.36	2.77	45.46	4.341	31.625	45.72	82	0.757	102.5	2.33	76.9	19	0.97	22.9898	-1.25448	1.31525	29.21	-1.26024	39.7	1.54	495.8	1.9	52.7	2.23
K	Na	Pr	Cl	336.53	1032	0.82	418.81	370.87	1156	0.93	495.85	1208	3563	1.13	527.79	0.86	39.0983	-1.09652	-0.0540791	72.1	-1.09754	75.6	2.03	418.8	2.35	48.36	2.77	45.46	4.341	31.625	45.72	82	0.757	102.5	2.33	76.9	19	0.97	22.9898	-1.25448	1.31525	29.21	-1.26024	39.7	1.54	495.8	1.9	52.7	2.23
K	Na	In	I	336.53	1032	0.82	418.81	370.87	1156	0.93	495.85	429.75	2345	1.78	558.3	0.86	39.0983	-1.09652	-0.0540791	72.1	-1.09754	75.6	2.03	418.8	2.35	48.36	2.77	45.46	4.341	31.625	45.72	82	0.757	102.5	2.33	76.9	19	0.97	22.9898	-1.25448	1.31525	29.21	-1.26024	39.7	1.54	495.8	1.9	52.7	2.23
K	Na	Ce	Br	336.53	1032	0.82	418.81	370.87	1156	0.93	495.85	1068	3633	1.12	534.39	0.86	39.0983	-1.09652	-0.0540791	72.1	-1.09754	75.6	2.03	418.8	2.35	48.36	2.77	45.46	4.341	31.625	45.72	82	0.757	102.5	2.33	76.9	19	0.97	22.9898	-1.25448	1.31525	29.21	-1.26024	39.7	1.54	495.8	1.9	52.7	2.23
K	Li	Bi	Cl	336.53	1032	0.82	418.81	453.69	1615	0.98	520.22	544.4	1837	2.02	702.95	0.86	39.0983	-1.09652	-0.0540791	72.1	-1.09754	75.6	2.03	418.8	2.35	48.36	2.77	45.46	4.341	31.625	45.72	82	0.757	102.5	2.33	76.9	19	0.53	6.941	-1.86553	0.227209	16.51	-1.86989	21.6	1.23	520	1.55	59.8	2.05
K	Li	Bi	Br	336.53	1032	0.82	418.81	453.69	1615	0.98	520.22	544.4	1837	2.02	702.95	0.86	39.0983	-1.09652	-0.0540791	72.1	-1.09754	75.6	2.03	418.8	2.35	48.36	2.77	45.46	4.341	31.625	45.72	82	0.757	102.5	2.33	76.9	19	0.53	6.941	-1.86553	0.227209	16.51	-1.86989	21.6	1.23	520	1.55	59.8	2.05
K	Na	Al	Cl	336.53	1032	0.82	418.81	370.87	1156	0.93	495.85	933.47	2792	1.61	577.54	0.86	39.0983	-1.09652	-0.0540791	72.1	-1.09754	75.6	2.03	418.8	2.35	48.36	2.77	45.46	4.341	31.625	45.72	82	0.757	102.5	2.33	76.9	19	0.97	22.9898	-1.25448	1.31525	29.21	-1.26024	39.7	1.54	495.8	1.9	52.7	2.23
K	Li	In	Cl	336.53	1032	0.82	418.81	453.69	1615	0.98	520.22	429.75	2345	1.78	558.3	0.86	39.0983	-1.09652	-0.0540791	72.1	-1.09754	75.6	2.03	418.8	2.35	48.36	2.77	45.46	4.341	31.625	45.72	82	0.757	102.5	2.33	76.9	19	0.53	6.941	-1.86553	0.227209	16.51	-1.86989	21.6	1.23	520	1.55	59.8	2.05
K	Ag	Sb	Cl	336.53	1032	0.82	418.81	1234.93	2435	1.93	731	903.78	1860	2.05	830.58	0.86	39.0983	-1.09652	-0.0540791	72.1	-1.09754	75.6	2.03	418.8	2.35	48.36	2.77	45.46	4.341	31.625	45.72	82	0.757	102.5	2.33	76.9	19	10.5	107.868	-2.71998	4.05276	16.2	-2.76539	17	1.34	731	1.444	125.7	1.75
K	Ag	Bi	Cl	336.53	1032	0.82	418.81	1234.93	2435	1.93	731	544.4	1837	2.02	702.95	0.86	39.0983	-1.09652	-0.0540791	72.1	-1.09754	75.6	2.03	418.8	2.35	48.36	2.77	45.46	4.341	31.625	45.72	82	0.757	102.5	2.33	76.9	19	10.5	107.868	-2.71998	4.05276	16.2	-2.76539	17	1.34	731	1.444	125.7	1.75
Rb	Cu	Sb	Br	312.46	961	0.82	403.03	1357.77	3200	1.9	745.48	903.78	1860	2.05	830.58	1.532	85.4678	-0.961937	0.0908836	88.64	-0.963335	93	2.16	403	2.48	46.89	2.98	55.9	4.177	27.28	40	91	0.363	58.2	2.34	69.2	37	8.96	63.456	-3.64289	4.37874	11.08	-3.68065	11.8	1.17	745.4	1.278	118.3	1.57
Na	Li	Pr	Cl	370.87	1156	0.93	495.85	453.69	1615	0.98	520.22	1208	3563	1.13	527.79	0.97	22.9898	-1.25448	1.31525	29.21	-1.26024	39.7	1.54	495.8	1.9	52.7	2.23	23.7	5.139	47.286	71.641	71	1.23	141	2.601	98.01	11	0.53	6.941	-1.86553	0.227209	16.51	-1.86989	21.6	1.23	520	1.55	59.8	2.05
Na	Li	Y	Cl	370.87	1156	0.93	495.85	453.69	1615	0.98	520.22	1799	3609	1.22	599.87	0.97	22.9898	-1.25448	1.31525	29.21	-1.26024	39.7	1.54	495.8	1.9	52.7	2.23	23.7	5.139	47.286	71.641	71	1.23	141	2.601	98.01	11	0.53	6.941	-1.86553	0.227209	16.51	-1.86989	21.6	1.23	520	1.55	59.8	2.05
Rb	Ag	Bi	Br	312.46	961	0.82	403.03	1234.93	2435	1.93	731	544.4	1837	2.02	702.95	1.532	85.4678	-0.961937	0.0908836	88.64	-0.963335	93	2.16	403	2.48	46.89	2.98	55.9	4.177	27.28	40	91	0.363	58.2	2.34	69.2	37	10.5	107.868	-2.71998	4.05276	16.2	-2.76539	17	1.34	731	1.444	125.7	1.75
Rb	Ag	Bi	Cl	312.46	961	0.82	403.03	1234.93	2435	1.93	731	544.4	1837	2.02	702.95	1.532	85.4678	-0.961937	0.0908836	88.64	-0.963335	93	2.16	403	2.48	46.89	2.98	55.9	4.177	27.28	40	91	0.363	58.2	2.34	69.2	37	10.5	107.868	-2.71998	4.05276	16.2	-2.76539	17	1.34	731	1.444	125.7	1.75
K	Rb	Mo	I	336.53	1032	0.82	418.81	312.46	961	0.82	403.03	2896	4912	2.16	684.32	0.86	39.0983	-1.09652	-0.0540791	72.1	-1.09754	75.6	2.03	418.8	2.35	48.36	2.77	45.46	4.341	31.625	45.72	82	0.757	102.5	2.33	76.9	19	1.532	85.4678	-0.961937	0.0908836	88.64	-0.963335	93	2.16	403	2.48	46.89	2.98
Rb	Na	Ce	I	312.46	961	0.82	403.03	370.87	1156	0.93	495.85	1068	3633	1.12	534.39	1.532	85.4678	-0.961937	0.0908836	88.64	-0.963335	93	2.16	403	2.48	46.89	2.98	55.9	4.177	27.28	40	91	0.363	58.2	2.34	69.2	37	0.97	22.9898	-1.25448	1.31525	29.21	-1.26024	39.7	1.54	495.8	1.9	52.7	2.23
Rb	K	Gd	Cl	312.46	961	0.82	403.03	336.53	1032	0.82	418.81	1585	3523	1.2	593.37	1.532	85.4678	-0.961937	0.0908836	88.64	-0.963335	93	2.16	403	2.48	46.89	2.98	55.9	4.177	27.28	40	91	0.363	58.2	2.34	69.2	37	0.86	39.0983	-1.09652	-0.0540791	72.1	-1.09754	75.6	2.03	418.8	2.35	48.36	2.77
Rb	K	Sm	Cl	312.46	961	0.82	403.03	336.53	1032	0.82	418.81	1345	2076	1.17	544.54	1.532	85.4678	-0.961937	0.0908836	88.64	-0.963335	93	2.16	403	2.48	46.89	2.98	55.9	4.177	27.28	40	91	0.363	58.2	2.34	69.2	37	0.86	39.0983	-1.09652	-0.0540791	72.1	-1.09754	75.6	2.03	418.8	2.35	48.36	2.77
Rb	Li	Sb	Br	312.46	961	0.82	403.03	453.69	1615	0.98	520.22	903.78	1860	2.05	830.58	1.532	85.4678	-0.961937	0.0908836	88.64	-0.963335	93	2.16	403	2.48	46.89	2.98	55.9	4.177	27.28	40	91	0.363	58.2	2.34	69.2	37	0.53	6.941	-1.86553	0.227209	16.51	-1.86989	21.6	1.23	520	1.55	59.8	2.05
Rb	Na	Ce	Cl	312.46	961	0.82	403.03	370.87	1156	0.93	495.85	1068	3633	1.12	534.39	1.532	85.4678	-0.961937	0.0908836	88.64	-0.963335	93	2.16	403	2.48	46.89	2.98	55.9	4.177	27.28	40	91	0.363	58.2	2.34	69.2	37	0.97	22.9898	-1.25448	1.31525	29.21	-1.26024	39.7	1.54	495.8	1.9	52.7	2.23
Rb	Na	In	Br	312.46	961	0.82	403.03	370.87	1156	0.93	495.85	429.75	2345	1.78	558.3	1.532	85.4678	-0.961937	0.0908836	88.64	-0.963335	93	2.16	403	2.48	46.89	2.98	55.9	4.177	27.28	40	91	0.363	58.2	2.34	69.2	37	0.97	22.9898	-1.25448	1.31525	29.21	-1.26024	39.7	1.54	495.8	1.9	52.7	2.23
Rb	Na	Sb	Br	312.46	961	0.82	403.03	370.87	1156	0.93	495.85	903.78	1860	2.05	830.58	1.532	85.4678	-0.961937	0.0908836	88.64	-0.963335	93	2.16	403	2.48	46.89	2.98	55.9	4.177	27.28	40	91	0.363	58.2	2.34	69.2	37	0.97	22.9898	-1.25448	1.31525	29.21	-1.26024	39.7	1.54	495.8	1.9	52.7	2.23
K	Na	Cr	Cl	336.53	1032	0.82	418.81	370.87	1156	0.93	495.85	2180	2944	1.66	652.87	0.86	39.0983	-1.09652	-0.0540791	72.1	-1.09754	75.6	2.03	418.8	2.35	48.36	2.77	45.46	4.341	31.625	45.72	82	0.757	102.5	2.33	76.9	19	0.97	22.9898	-1.25448	1.31525	29.21	-1.26024	39.7	1.54	495.8	1.9	52.7	2.23
Rb	Li	V	Cl	312.46	961	0.82	403.03	453.69	1615	0.98	520.22	2183	3680	1.63	650.91	1.532	85.4678	-0.961937	0.0908836	88.64	-0.963335	93	2.16	403	2.48	46.89	2.98	55.9	4.177	27.28	40	91	0.363	58.2	2.34	69.2	37	0.53	6.941	-1.86553	0.227209	16.51	-1.86989	21.6	1.23	520	1.55	59.8	2.05
Rb	Na	Tm	Cl	312.46	961	0.82	403.03	370.87	1156	0.93	495.85	1818	2223	1.25	596.7	1.532	85.4678	-0.961937	0.0908836	88.64	-0.963335	93	2.16	403	2.48	46.89	2.98	55.9	4.177	27.28	40	91	0.363	58.2	2.34	69.2	37	0.97	22.9898	-1.25448	1.31525	29.21	-1.26024	39.7	1.54	495.8	1.9	52.7	2.23
Rb	Na	In	Cl	312.46	961	0.82	403.03	370.87	1156	0.93	495.85	429.75	2345	1.78	558.3	1.532	85.4678	-0.961937	0.0908836	88.64	-0.963335	93	2.16	403	2.48	46.89	2.98	55.9	4.177	27.28	40	91	0.363	58.2	2.34	69.2	37	0.97	22.9898	-1.25448	1.31525	29.21	-1.26024	39.7	1.54	495.8	1.9	52.7	2.23
[truncated: 63 more columns]
